# Supplementary material for: A divergent construction of fused and bridged carbo-/heterocyclic scaffoldsviacascade reactions of aryl azomethine imines with vinyl cyclic carbonates
Source: Royal Society of Chemistry journal article supplement (doi:10.1039/d2qo01897g), 2023-01-01
Supplement: d2qo01897g1.pdf [file d2qo01897g1.pdf]

## Supporting Information

### **Divergent Construction of Fused and Bridged Carbo-/Heterocyclic Scaffolds via Cascade Reactions of Aryl Azomethine Imines with Vinyl Cyclic Carbonates**

Xinyuan Cai, Xia Song, Xueying Yang, Xinying Zhang\*, Xuesen Fan\*

*NMPA Key Laboratory for Research and Evaluation of Innovative Drug, Collaborative Innovation Center of Henan Province for Green Manufacturing of Fine Chemicals, Key Laboratory of Green Chemical Media and Reactions, Ministry of Education, School of Chemistry and Chemical Engineering, Henan Normal University,*

*Xinxiang, Henan 453007, China*

*E-mail: xinyingzhang@htu.cn; xuesen.fan@htu.cn*

## Table of Contents

|             |                                                |         |
|-------------|------------------------------------------------|---------|
| <b>I</b>    | General experimental information               | S3-S3   |
| <b>II</b>   | Experimental procedures and spectroscopic data | S4-S31  |
| <b>III</b>  | Mechanistic studies                            | S32-S35 |
| <b>IV</b>   | Copies of NMR spectra of <b>3a-3v</b>          | S36-S63 |
| <b>V</b>    | Copies of NMR spectra of <b>5a-5u</b>          | S64-S88 |
| <b>VI</b>   | Copies of NMR spectra of <b>6-9</b>            | S89-S92 |
| <b>VII</b>  | X-ray crystal structure and data of <b>3p</b>  | S93-S94 |
| <b>VIII</b> | X-ray crystal structure and data of <b>5a</b>  | S95-S96 |
| <b>IX</b>   | References                                     | S97-S97 |

## I. General experimental information

Commercial reagents were used without further purification. Aryl azomethine imines (**1**)<sup>[1]</sup> and 5-methylene-1,3-dioxan-2-one (**4**)<sup>[2]</sup> were prepared based on literature procedures. Melting points were recorded with a micro melting point apparatus and uncorrected. The <sup>1</sup>H NMR spectra were recorded at 400 MHz or 600 MHz. The <sup>13</sup>C NMR spectra were recorded at 100 MHz or 150 MHz. The <sup>19</sup>F NMR spectra were recorded at 376 MHz or 565 MHz. Chemical shifts were expressed in parts per million ( $\delta$ ), and were reported as s (singlet), d (doublet), t (triplet), dd (doublet of doublets), m (multiplet), br s (broad singlet), etc. The coupling constants  $J$  were given in Hz. High resolution mass spectra (HRMS) were obtained *via* ESI mode by using a MicrOTOF mass spectrometer. All reactions were monitored by thin layer chromatography (TLC) using silica gel plates (silica gel 60 F254 0.25 mm), and components were visualized by observation under UV light (254 and 365 nm).

## II. Experimental procedures and spectroscopic data

### 1. Typical procedure for the synthesis of 3a and spectroscopic data of 3a-3v

To a reaction tube equipped with a stir bar were charged with 2-benzylidene-3,3-dimethyl-5-oxopyrazolidin-2-ium-1-ide (**1a**, 40.4 mg, 0.2 mmol), 4-vinyl-1,3-dioxolan-2-one (**2**, 34.2 mg, 0.3 mmol), [RhCp\*(MeCN)<sub>3</sub>](SbF<sub>6</sub>)<sub>2</sub> (8.3 mg, 0.01 mmol), AgSbF<sub>6</sub> (6.9 mg, 0.02 mmol) and TFE (2 mL). The mixture was stirred at 120 °C under air for 6 h. Upon completion, it was cooled to room temperature, filtered through a pad of celite and concentrated under reduced pressure. The residue was purified by silica gel chromatography using petroleum ether/ethyl acetate (1:1) as eluent to afford **3a**. **3b-3v** were obtained in a similar manner.

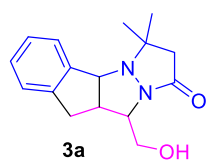

#### 10-(Hydroxymethyl)-3,3-dimethyl-2,3,4a,9,9a,10-hexahydro-1H-indeno[1,2-c]pyrazolo[1,2-a]pyrazol-1-one (**3a**)

Eluent: petroleum ether/ethyl acetate (1:1). Yellowish oil (44.7 mg, 82%). <sup>1</sup>H NMR (600 MHz, CDCl<sub>3</sub>): δ 7.29-7.25 (m, 3H), 7.22-7.21 (m, 1H), 5.55 (br s, 1H), 4.62 (d, *J* = 8.4 Hz, 1H), 3.99 (d, *J* = 12.0 Hz, 1H), 3.88 (dd, *J*<sub>1</sub> = 12.0 Hz, *J*<sub>2</sub> = 8.4 Hz, 1H), 3.23 (t, *J* = 9.0 Hz, 1H), 3.10 (dd, *J*<sub>1</sub> = 16.8 Hz, *J*<sub>2</sub> = 7.8 Hz, 1H), 2.85-2.79 (m, 3H), 2.37 (d, *J* = 15.6 Hz, 1H), 1.50 (s, 3H), 1.27 (s, 3H). <sup>13</sup>C{<sup>1</sup>H} NMR (150 MHz, CDCl<sub>3</sub>): δ 164.9, 142.5, 140.3, 128.4, 127.6, 125.5, 125.3, 64.0, 63.75, 63.69, 61.6, 49.7, 46.8, 34.3, 26.3, 19.6. HRMS (ESI) *m/z*: [M+H]<sup>+</sup> Calcd for C<sub>16</sub>H<sub>21</sub>N<sub>2</sub>O<sub>2</sub> 273.1598; Found 273.1590.

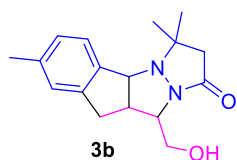

#### 10-(Hydroxymethyl)-3,3,7-trimethyl-2,3,4a,9,9a,10-hexahydro-1H-indeno[1,2-c]pyrazolo[1,2-a]pyrazol-1-one (**3b**)

Eluent: petroleum ether/ethyl acetate (1:1). Yellow solid (41.1 mg, 72%), mp 137.0-137.9 °C. <sup>1</sup>H NMR (600 MHz, CDCl<sub>3</sub>): δ 7.11 (d, *J* = 7.8 Hz, 1H), 7.08 (d, *J* = 7.8 Hz, 1H), 7.06 (s, 1H), 5.55 (dd, *J*<sub>1</sub> = 11.4 Hz, *J*<sub>2</sub> = 3.6 Hz, 1H), 4.61 (d, *J* = 8.4 Hz, 1H), 4.03-3.99 (m, 1H), 3.92-3.88 (m, 1H), 3.25 (t, *J* = 9.0 Hz, 1H), 3.07 (dd, *J*<sub>1</sub> = 16.2 Hz, *J*<sub>2</sub> = 7.2 Hz, 1H), 2.86-2.81 (m, 2H), 2.77 (d, *J* = 16.2 Hz, 1H), 2.40 (d, *J* = 15.0 Hz, 1H), 2.36 (s, 3H), 1.54 (s, 3H), 1.28 (s, 3H). <sup>13</sup>C{<sup>1</sup>H} NMR (150 MHz, CDCl<sub>3</sub>): δ 165.0, 140.7, 138.6, 128.6, 126.1, 125.0, 64.1, 63.8, 61.6, 49.6, 47.2, 34.3, 26.2, 21.3, 19.9. HRMS (ESI) *m/z*: [M+H]<sup>+</sup> Calcd for C<sub>17</sub>H<sub>23</sub>N<sub>2</sub>O<sub>2</sub> 287.1754; Found 287.1750.

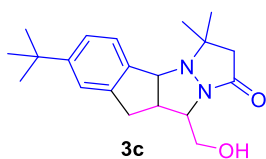

**7-(*tert*-Butyl)-10-(hydroxymethyl)-3,3-dimethyl-2,3,4a,9,9a,10-hexahydro-1*H*-indeno[1,2-*c*]pyrazolo[1,2-*a*]pyrazol-1-one (3c)**

Eluent: petroleum ether/ethyl acetate (1:1). Yellowish solid (43.8 mg, 67%), mp 190.4-191.0 °C. <sup>1</sup>H NMR (600 MHz, CDCl<sub>3</sub>): δ 7.33 (dd, *J*<sub>1</sub> = 8.4 Hz, *J*<sub>2</sub> = 1.8 Hz, 1H), 7.25 (s, 1H), 7.20 (d, *J* = 7.8 Hz, 1H), 5.56 (dd, *J*<sub>1</sub> = 11.4 Hz, *J*<sub>2</sub> = 3.6 Hz, 1H), 4.62 (d, *J* = 8.4 Hz, 1H), 4.01 (td, *J*<sub>1</sub> = 12.6 Hz, *J*<sub>2</sub> = 2.4 Hz, 1H), 3.92-3.88 (m, 1H), 3.29 (t, *J* = 8.4 Hz, 1H), 3.11 (dd, *J*<sub>1</sub> = 16.2 Hz, *J*<sub>2</sub> = 7.2 Hz, 1H), 2.88-2.81 (m, 3H), 2.39 (d, *J* = 15.6 Hz, 1H), 1.51 (s, 3H), 1.30 (s, 9H), 1.29 (s, 3H). <sup>13</sup>C{<sup>1</sup>H} NMR (150 MHz, CDCl<sub>3</sub>): δ 164.8, 151.9, 140.3, 139.5, 125.1, 124.7, 122.2, 63.8, 63.7, 63.6, 61.8, 49.8, 47.1, 34.7, 34.5, 31.5, 26.4, 19.7. HRMS (ESI) *m/z*: [M+H]<sup>+</sup> Calcd for C<sub>20</sub>H<sub>29</sub>N<sub>2</sub>O<sub>2</sub> 329.2224; Found 329.2215.

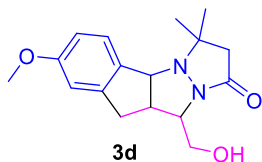

**10-(Hydroxymethyl)-7-methoxy-3,3-dimethyl-2,3,4a,9,9a,10-hexahydro-1*H*-indeno[1,2-*c*]pyrazolo[1,2-*a*]pyrazol-1-one (3d)**

Eluent: petroleum ether/ethyl acetate (1:1). Yellow solid (38.5 mg, 64%), mp 114.3-115.1 °C.  $^1\text{H}$  NMR (600 MHz,  $\text{CDCl}_3$ ):  $\delta$  7.16 (d,  $J = 8.4$  Hz, 1H), 6.83 (dd,  $J_1 = 8.4$  Hz,  $J_2 = 2.4$  Hz, 1H), 6.74 (d,  $J = 1.8$  Hz, 1H), 5.57 (br s, 1H), 4.59 (d,  $J = 8.4$  Hz, 1H), 4.00 (dd,  $J_1 = 12.0$  Hz,  $J_2 = 2.4$  Hz, 1H), 3.89 (dd,  $J_1 = 12.6$  Hz,  $J_2 = 8.4$  Hz, 1H), 3.79 (s, 3H), 3.29 (t,  $J = 9.0$  Hz, 1H), 3.09 (dd,  $J_1 = 16.2$  Hz,  $J_2 = 7.2$  Hz, 1H), 2.87-2.78 (m, 3H), 2.39 (d,  $J = 15.0$  Hz, 1H), 1.50 (s, 3H), 1.28 (s, 3H).  $^{13}\text{C}\{^1\text{H}\}$  NMR (150 MHz,  $\text{CDCl}_3$ ):  $\delta$  164.9, 160.3, 142.1, 134.4, 126.0, 114.3, 110.1, 63.8, 63.6, 63.5, 61.8, 55.5, 49.7, 47.5, 34.6, 26.4, 19.8. HRMS (ESI)  $m/z$ :  $[\text{M}+\text{H}]^+$  Calcd for  $\text{C}_{17}\text{H}_{23}\text{N}_2\text{O}_3$  303.1703; Found 303.1704.

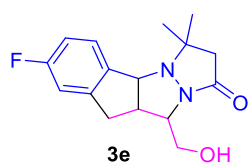

**7-Fluoro-10-(hydroxymethyl)-3,3-dimethyl-2,3,4a,9,9a,10-hexahydro-1H-indeno[1,2-c]pyrazolo[1,2-a]pyrazol-1-one (3e)**

Eluent: petroleum ether/ethyl acetate (1:1). Yellow solid (38.9 mg, 67%), mp 149.7-150.8 °C.  $^1\text{H}$  NMR (400 MHz,  $\text{CDCl}_3$ ):  $\delta$  7.21 (dd,  $J_1 = 8.0$  Hz,  $J_2 = 5.2$  Hz, 1H), 6.98 (td,  $J_1 = 8.8$  Hz,  $J_2 = 2.0$  Hz, 1H), 6.91 (d,  $J = 8.8$  Hz, 1H), 5.47 (dd,  $J_1 = 10.8$  Hz,  $J_2 = 3.6$  Hz, 1H), 4.60 (d,  $J = 8.0$  Hz, 1H), 4.05-3.98 (m, 1H), 3.92-3.86 (m, 1H), 3.27 (t,  $J = 8.8$  Hz, 1H), 3.12 (dd,  $J_1 = 16.4$  Hz,  $J_2 = 7.2$  Hz, 1H), 2.92-2.88 (m, 1H), 2.85-2.79 (m, 2H), 2.39 (d,  $J = 15.2$  Hz, 1H), 1.50 (s, 3H), 1.28 (s, 3H).  $^{13}\text{C}\{^1\text{H}\}$  NMR (100 MHz,  $\text{CDCl}_3$ ):  $\delta$  165.0, 163.3 (d,  $^1J_{\text{C-F}} = 244.1$  Hz), 142.6 (d,  $^3J_{\text{C-F}} = 8.7$  Hz), 138.1 (d,  $^4J_{\text{C-F}} = 2.9$  Hz), 126.6 (d,  $^3J_{\text{C-F}} = 9.4$  Hz), 115.0 (d,  $^2J_{\text{C-F}} = 23.1$  Hz), 112.2 (d,  $^2J_{\text{C-F}} = 22.4$  Hz), 63.8, 63.7, 63.3, 61.5, 49.6, 47.3, 34.3 (d,  $^4J_{\text{C-F}} = 2.1$  Hz), 26.3, 19.7.  $^{19}\text{F}$  NMR (565 MHz,  $\text{CDCl}_3$ ):  $\delta$  -114.30 - -114.34 (m). HRMS (ESI)  $m/z$ :  $[\text{M}+\text{H}]^+$  Calcd for  $\text{C}_{16}\text{H}_{20}\text{FN}_2\text{O}_2$  291.1503; Found 291.1503.

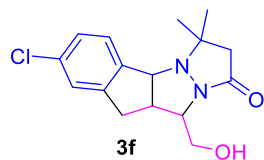

**7-Chloro-10-(hydroxymethyl)-3,3-dimethyl-2,3,4a,9,9a,10-hexahydro-1H-indeno[1,2-c]pyrazolo[1,2-a]pyrazol-1-one (3f)**

Eluent: petroleum ether/ethyl acetate (1:1). Yellow solid (43.4 mg, 71%), mp 153.2-154.4 °C.  $^1\text{H}$  NMR (600 MHz,  $\text{CDCl}_3$ ):  $\delta$  7.25 (dd,  $J_1 = 8.4$  Hz,  $J_2 = 1.8$  Hz, 1H), 7.21 (s, 1H), 7.18 (d,  $J = 7.8$  Hz, 1H), 5.47-5.45 (m, 1H), 4.59 (d,  $J = 7.8$  Hz, 1H), 4.01 (t,  $J = 10.2$  Hz, 1H), 3.88 (dd,  $J_1 = 12.6$  Hz,  $J_2 = 8.4$  Hz, 1H), 3.24 (t,  $J = 9.0$  Hz, 1H), 3.10 (dd,  $J_1 = 16.2$  Hz,  $J_2 = 7.2$  Hz, 1H), 2.87 (dd,  $J_1 = 15.6$  Hz,  $J_2 = 7.8$  Hz, 1H), 2.83-2.78 (m, 2H), 2.39 (d,  $J = 15.6$  Hz, 1H), 1.49 (s, 3H), 1.28 (s, 3H).  $^{13}\text{C}\{^1\text{H}\}$  NMR (150 MHz,  $\text{CDCl}_3$ ):  $\delta$  165.0, 142.3, 141.1, 134.3, 128.0, 126.5, 125.6, 63.7, 63.6, 63.4, 61.5, 49.6, 47.0, 34.1, 26.3, 19.7. HRMS (ESI)  $m/z$ :  $[\text{M}+\text{H}]^+$  Calcd for  $\text{C}_{16}\text{H}_{20}\text{ClN}_2\text{O}_2$  307.1208; Found 307.1204.

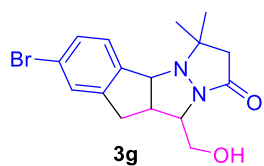

**7-Bromo-10-(hydroxymethyl)-3,3-dimethyl-2,3,4a,9,9a,10-hexahydro-1H-indeno[1,2-c]pyrazolo[1,2-a]pyrazol-1-one (3g)**

Eluent: petroleum ether/ethyl acetate (1:1). Yellow solid (45.5 mg, 65%), mp 176.7-177.7 °C.  $^1\text{H}$  NMR (600 MHz,  $\text{CDCl}_3$ ):  $\delta$  7.40 (d,  $J = 7.8$  Hz, 1H), 7.38 (s, 1H), 7.13 (d,  $J = 7.8$  Hz, 1H), 5.44 (dd,  $J_1 = 10.8$  Hz,  $J_2 = 3.6$  Hz, 1H), 4.57 (d,  $J = 8.4$  Hz, 1H), 4.03-3.99 (m, 1H), 3.90-3.86 (m, 1H), 3.24 (t,  $J = 9.0$  Hz, 1H), 3.12 (dd,  $J_1 = 16.8$  Hz,  $J_2 = 7.2$  Hz, 1H), 2.88-2.79 (m, 3H), 2.39 (d,  $J = 15.0$  Hz, 1H), 1.49 (s, 3H), 1.28 (s, 3H).  $^{13}\text{C}\{^1\text{H}\}$  NMR (150 MHz,  $\text{DMSO}-d_6$ ):  $\delta$  164.5, 144.9, 142.9, 130.2, 128.5, 128.0, 121.4, 63.3, 63.0, 62.3, 60.0, 49.8, 48.7, 35.0, 26.3, 19.7. HRMS (ESI)  $m/z$ :  $[\text{M}+\text{Na}]^+$  Calcd for  $\text{C}_{16}\text{H}_{19}\text{BrN}_2\text{NaO}_2$  373.0522; Found 373.0512.

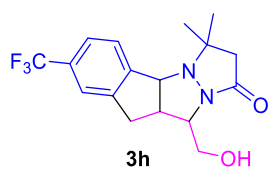

**10-(Hydroxymethyl)-3,3-dimethyl-7-(trifluoromethyl)-2,3,4a,9,9a,10-hexahydro-1H-indeno[1,2-c]pyrazolo[1,2-a]pyrazol-1-one (3h)**

Eluent: petroleum ether/ethyl acetate (1:1). White solid (32.4 mg, 48%), mp 175.4-176.0 °C. <sup>1</sup>H NMR (600 MHz, CDCl<sub>3</sub>): δ 7.55 (d, *J* = 7.8 Hz, 1H), 7.50 (s, 1H), 7.38 (d, *J* = 7.8 Hz, 1H), 5.38-5.37 (m, 1H), 4.67 (d, *J* = 8.4 Hz, 1H), 4.04 (t, *J* = 10.8 Hz, 1H), 3.92-3.89 (m, 1H), 3.23 (t, *J* = 9.0 Hz, 1H), 3.18 (dd, *J*<sub>1</sub> = 16.2 Hz, *J*<sub>2</sub> = 7.2 Hz, 1H), 2.93 (dd, *J*<sub>1</sub> = 16.2 Hz, *J*<sub>2</sub> = 8.4 Hz, 1H), 2.88 (d, *J* = 16.8 Hz, 1H), 2.84 (d, *J* = 15.6 Hz, 1H), 2.41 (d, *J* = 15.6 Hz, 1H), 1.53 (s, 3H), 1.30 (s, 3H). <sup>13</sup>C{<sup>1</sup>H} NMR (150 MHz, CDCl<sub>3</sub>): 165.0, 146.5, 141.1, 131.0 (q, <sup>2</sup>*J*<sub>C-F</sub> = 32.9 Hz), 125.9, 124.9 (q, <sup>3</sup>*J*<sub>C-F</sub> = 4.4 Hz), 124.1 (q, <sup>1</sup>*J*<sub>C-F</sub> = 271.4 Hz), 122.5 (q, <sup>3</sup>*J*<sub>C-F</sub> = 4.4 Hz), 63.9, 63.8, 63.5, 61.3, 49.5, 46.8, 34.1, 26.4, 19.7. <sup>19</sup>F NMR (565 MHz, CDCl<sub>3</sub>): δ -62.24 (s). HRMS (ESI) *m/z*: [M+H]<sup>+</sup> Calcd for C<sub>17</sub>H<sub>20</sub>F<sub>3</sub>N<sub>2</sub>O<sub>2</sub> 341.1471; Found 341.1467.

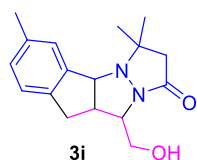

**10-(Hydroxymethyl)-3,3,6-trimethyl-2,3,4a,9,9a,10-hexahydro-1H-indeno[1,2-c]pyrazolo[1,2-a]pyrazol-1-one (3i)**

Eluent: petroleum ether/ethyl acetate (1:1). Yellow solid (37.0 mg, 65%), mp 153.4-154.4 °C. <sup>1</sup>H NMR (600 MHz, CDCl<sub>3</sub>): δ 7.15 (d, *J* = 7.8 Hz, 1H), 7.09 (d, *J* = 8.4 Hz, 1H), 7.04 (s, 1H), 5.60 (dd, *J*<sub>1</sub> = 10.8 Hz, *J*<sub>2</sub> = 3.6 Hz, 1H), 4.60 (d, *J* = 8.4 Hz, 1H), 4.02-3.98 (m, 1H), 3.91-3.87 (m, 1H), 3.28 (t, *J* = 9.0 Hz, 1H), 3.08 (dd, *J*<sub>1</sub> = 16.2 Hz, *J*<sub>2</sub> = 7.2 Hz, 1H), 2.86-2.82 (m, 2H), 2.78 (d, *J* = 16.8 Hz, 1H), 2.39 (d, *J* = 15.0 Hz, 1H), 2.34 (s, 3H), 1.51 (s, 3H), 1.28 (s, 3H). <sup>13</sup>C{<sup>1</sup>H} NMR (150 MHz, CDCl<sub>3</sub>): δ 165.0, 142.5, 137.5, 137.2, 129.5, 125.7, 125.3, 64.0, 63.9, 63.8, 61.6, 49.6, 47.0, 33.8, 26.3, 21.4, 19.7. HRMS (ESI) *m/z*: [M+H]<sup>+</sup> Calcd for C<sub>17</sub>H<sub>23</sub>N<sub>2</sub>O<sub>2</sub> 287.1754; Found 287.1749.



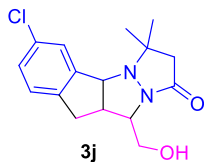

**6-Chloro-10-(hydroxymethyl)-3,3-dimethyl-2,3,4a,9,9a,10-hexahydro-1H-indeno[1,2-c]pyrazolo[1,2-a]pyrazol-1-one (3j)**

Eluent: petroleum ether/ethyl acetate (1:1). Yellow solid (37.5 mg, 61%), mp 150.0-151.4 °C.  $^1\text{H}$  NMR (400 MHz,  $\text{CDCl}_3$ ):  $\delta$  7.25-7.22 (m, 2H), 7.15 (d,  $J = 8.0$  Hz, 1H), 5.42 (dd,  $J_1 = 10.8$  Hz,  $J_2 = 4.0$  Hz, 1H), 4.61 (d,  $J = 8.4$  Hz, 1H), 4.05-3.99 (m, 1H), 3.92-3.86 (m, 1H), 3.23 (t,  $J = 9.2$  Hz, 1H), 3.08 (dd,  $J_1 = 16.4$  Hz,  $J_2 = 7.2$  Hz, 1H), 2.90-2.82 (m, 2H), 2.78 (d,  $J = 16.8$  Hz, 1H), 2.39 (d,  $J = 15.2$  Hz, 1H), 1.52 (s, 3H), 1.27 (s, 3H).  $^{13}\text{C}\{^1\text{H}\}$  NMR (150 MHz,  $\text{CDCl}_3$ ):  $\delta$  165.1, 144.6, 138.6, 133.4, 128.8, 126.6, 125.6, 63.9, 63.8, 63.7, 61.4, 49.6, 47.0, 33.7, 26.3, 19.6. HRMS (ESI)  $m/z$ :  $[\text{M}+\text{H}]^+$  Calcd for  $\text{C}_{16}\text{H}_{20}\text{ClN}_2\text{O}_2$  307.1208; Found 307.1206.

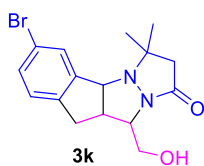

**6-Bromo-10-(hydroxymethyl)-3,3-dimethyl-2,3,4a,9,9a,10-hexahydro-1H-indeno[1,2-c]pyrazolo[1,2-a]pyrazol-1-one (3k)**

Eluent: petroleum ether/ethyl acetate (1:1). Yellow solid (44.8 mg, 64%). mp 147.4-148.3 °C.  $^1\text{H}$  NMR (600 MHz,  $\text{CDCl}_3$ ):  $\delta$  7.38 (dd,  $J_1 = 8.4$  Hz,  $J_2 = 1.8$  Hz, 1H), 7.37 (s, 1H), 7.10 (d,  $J = 7.8$  Hz, 1H), 5.42 (dd,  $J_1 = 10.8$  Hz,  $J_2 = 3.6$  Hz, 1H), 4.62 (d,  $J = 8.4$  Hz, 1H), 4.04-3.00 (m, 1H), 3.91-3.87 (m, 1H), 3.23 (t,  $J = 9.0$  Hz, 1H), 3.06 (dd,  $J_1 = 16.8$  Hz,  $J_2 = 7.2$  Hz, 1H), 2.87-2.82 (m, 2H), 2.76 (d,  $J = 16.8$  Hz, 1H), 2.39 (d,  $J = 15.6$  Hz, 1H), 1.52 (s, 3H), 1.27 (s, 3H).  $^{13}\text{C}\{^1\text{H}\}$  NMR (150 MHz,  $\text{CDCl}_3$ ):  $\delta$  165.1, 145.0, 139.2, 131.6, 128.6, 127.0, 121.4, 63.9, 63.8, 63.7, 61.4, 49.5, 46.9, 33.7, 26.4, 19.6. HRMS (ESI)  $m/z$ :  $[\text{M}+\text{H}]^+$  Calcd for  $\text{C}_{16}\text{H}_{20}\text{BrN}_2\text{O}_2$  351.0703; Found 351.0701.

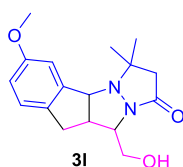

**10-(Hydroxymethyl)-6-methoxy-3,3-dimethyl-2,3,4a,9,9a,10-hexahydro-1H-indeno[1,2-c]pyrazolo[1,2-a]pyrazol-1-one (3l)**

Eluent: petroleum ether/ethyl acetate (1:1). Yellowish solid (11.5 mg, 19%), mp 114.7-115.3 °C. <sup>1</sup>H NMR (600 MHz, CDCl<sub>3</sub>): δ 7.13 (d, *J* = 7.8 Hz, 1H), 6.83 (dd, *J*<sub>1</sub> = 8.4 Hz, *J*<sub>2</sub> = 1.8 Hz, 1H), 6.78 (d, *J* = 1.8 Hz, 1H), 5.52-5.50 (m, 1H), 4.60 (d, *J* = 7.8 Hz, 1H), 4.01 (t, *J* = 10.8 Hz, 1H), 3.91-3.88 (m, 1H), 3.81 (s, 3H), 3.26 (t, *J* = 9.6 Hz, 1H), 3.05 (dd, *J*<sub>1</sub> = 15.6 Hz, *J*<sub>2</sub> = 7.2 Hz, 1H), 2.86-2.82 (m, 2H), 2.74 (d, *J* = 16.2 Hz, 1H), 2.39 (d, *J* = 15.0 Hz, 1H), 1.52 (s, 3H), 1.28 (s, 3H). <sup>13</sup>C{<sup>1</sup>H} NMR (150 MHz, CDCl<sub>3</sub>): δ 164.9, 159.7, 144.0, 132.1, 126.2, 114.7, 110.3, 64.1, 63.8, 63.7, 61.7, 55.5, 49.7, 47.3, 33.4, 26.4, 19.6. HRMS (ESI) *m/z*: [M+H]<sup>+</sup> Calcd for C<sub>17</sub>H<sub>23</sub>N<sub>2</sub>O<sub>3</sub> 303.1703; Found 303.1696.

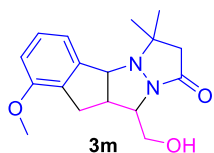

**10-(Hydroxymethyl)-8-methoxy-3,3-dimethyl-2,3,4a,9,9a,10-hexahydro-1H-indeno[1,2-c]pyrazolo[1,2-a]pyrazol-1-one (3m)**

Eluent: petroleum ether/ethyl acetate (1:1). Yellow solid (31.3 mg, 52%), mp 150.6-151.3 °C. <sup>1</sup>H NMR (600MHz, CDCl<sub>3</sub>): δ 7.28-7.26 (m, 1H), 6.87 (d, *J* = 7.2 Hz, 1H), 6.76 (d, *J* = 7.8 Hz, 1H), 5.50 (br s, 1H), 4.64 (d, *J* = 8.4 Hz, 1H), 4.03-4.01 (m, 1H), 3.89 (dd, *J*<sub>1</sub> = 12.6 Hz, *J*<sub>2</sub> = 8.4 Hz, 1H), 3.83 (s, 3H), 3.26 (t, *J* = 9.0 Hz, 1H), 2.97 (dd, *J*<sub>1</sub> = 16.2 Hz, *J*<sub>2</sub> = 6.6 Hz, 1H), 2.88-2.82 (m, 3H), 2.39 (d, *J* = 15.0 Hz, 1H), 1.51 (s, 3H), 1.28 (s, 3H). <sup>13</sup>C{<sup>1</sup>H} NMR (150 MHz, CDCl<sub>3</sub>): δ 164.9, 156.5, 144.3, 129.4, 128.3, 117.1, 109.4, 64.5, 63.9, 63.7, 61.6, 55.3, 49.7, 46.7, 31.1, 26.4, 19.6. HRMS (ESI) *m/z*: [M+H]<sup>+</sup> Calcd for C<sub>17</sub>H<sub>23</sub>N<sub>2</sub>O<sub>3</sub> 303.1703; Found 303.1702.

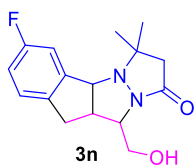

**6-Fluoro-10-(hydroxymethyl)-3,3-dimethyl-2,3,4a,9,9a,10-hexahydro-1H-indeno[1,2-c]pyrazolo[1,2-a]pyrazol-1-one (3n)**

Eluent: petroleum ether/ethyl acetate (1:1). Yellow solid (11.6 mg, 20%), mp 117.5-118.1 °C. <sup>1</sup>H NMR (600 MHz, CDCl<sub>3</sub>): δ 7.17 (dd, *J*<sub>1</sub> = 8.4 Hz, *J*<sub>2</sub> = 6.0 Hz, 1H), 6.98-6.93 (m, 2H), 5.45 (dd, *J*<sub>1</sub> = 10.8 Hz, *J*<sub>2</sub> = 3.6 Hz, 1H), 4.61 (d, *J* = 8.4 Hz, 1H), 4.04-4.00 (m, 1H), 3.91-3.87 (m, 1H), 3.24 (t, *J* = 8.4 Hz, 1H), 3.08 (dd, *J*<sub>1</sub> = 16.2 Hz, *J*<sub>2</sub> = 7.2 Hz, 1H), 2.88 (q, *J* = 7.8 Hz, 1H), 2.83 (d, *J* = 15.6 Hz, 1H), 2.77 (d, *J* = 16.8 Hz, 1H), 2.39 (d, *J* = 15.0 Hz, 1H), 1.51 (s, 3H), 1.27 (s, 3H). <sup>13</sup>C{<sup>1</sup>H} NMR (150 MHz, CDCl<sub>3</sub>): δ 165.0, 162.8 (d, <sup>1</sup>*J*<sub>C-F</sub> = 243.9 Hz), 144.8 (d, <sup>3</sup>*J*<sub>C-F</sub> = 7.7 Hz), 135.5 (d, <sup>4</sup>*J*<sub>C-F</sub> = 2.3 Hz), 126.6 (d, <sup>3</sup>*J*<sub>C-F</sub> = 8.9 Hz), 115.7 (d, <sup>2</sup>*J*<sub>C-F</sub> = 21.9 Hz), 112.2 (d, <sup>2</sup>*J*<sub>C-F</sub> = 23.1 Hz), 63.9 (d, <sup>4</sup>*J*<sub>C-F</sub> = 2.1 Hz), 63.8, 63.7, 61.5, 49.6, 47.3, 33.5, 26.3, 19.6. <sup>19</sup>F NMR (565 MHz, CDCl<sub>3</sub>): δ -115.2 - -115.3 (m). HRMS (ESI) *m/z*: [M+H]<sup>+</sup> Calcd for C<sub>16</sub>H<sub>20</sub>FN<sub>2</sub>O<sub>2</sub> 291.1503; Found 291.1500.

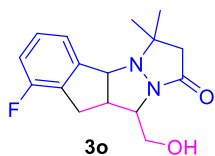

**8-Fluoro-10-(hydroxymethyl)-3,3-dimethyl-2,3,4a,9,9a,10-hexahydro-1H-indeno[1,2-c]pyrazolo[1,2-a]pyrazol-1-one (3o)**

Eluent: petroleum ether/ethyl acetate (1:1). Yellow solid (29.7 mg, 51%), mp 148.7-149.1 °C. <sup>1</sup>H NMR (600 MHz, CDCl<sub>3</sub>): δ 7.29-7.27 (m, 1H), 7.06 (d, *J* = 7.8 Hz, 1H), 6.96 (t, *J* = 9.0 Hz, 1H), 5.42 (dd, *J*<sub>1</sub> = 10.8 Hz, *J*<sub>2</sub> = 3.6 Hz, 1H), 4.66 (d, *J* = 7.8 Hz, 1H), 4.06-4.02 (m, 1H), 3.92-3.88 (m, 1H), 3.26 (t, *J* = 8.4 Hz, 1H), 3.08 (dd, *J*<sub>1</sub> = 16.8 Hz, *J*<sub>2</sub> = 7.2 Hz, 1H), 2.93-2.90 (m, 2H), 2.83 (d, *J* = 15.6 Hz, 1H), 2.40 (d, *J* = 15.6 Hz, 1H), 1.51 (s, 3H), 1.29 (s, 3H). <sup>13</sup>C{<sup>1</sup>H} NMR (150 MHz, CDCl<sub>3</sub>): δ 165.0, 159.7 (d, <sup>1</sup>*J*<sub>C-F</sub> = 247.2 Hz), 146.1 (d, <sup>3</sup>*J*<sub>C-F</sub> = 5.6 Hz), 129.8 (d, <sup>3</sup>*J*<sub>C-F</sub> = 7.8 Hz), 126.8 (d, <sup>2</sup>*J*<sub>C-F</sub> = 17.6 Hz), 120.9 (d, <sup>4</sup>*J*<sub>C-F</sub> = 3.3 Hz), 114.7 (d, <sup>2</sup>*J*<sub>C-F</sub> = 20.7 Hz), 64.2 (d, <sup>4</sup>*J*<sub>C-F</sub> = 2.1 Hz), 63.8, 63.6, 61.4, 49.6, 46.8, 30.3, 26.4, 19.7. <sup>19</sup>F NMR (565 MHz, CDCl<sub>3</sub>): δ -117.50 - -117.53 (m). HRMS (ESI) *m/z*: [M+H]<sup>+</sup> Calcd for C<sub>16</sub>H<sub>20</sub>FN<sub>2</sub>O<sub>2</sub> 291.1503; Found 291.1504.

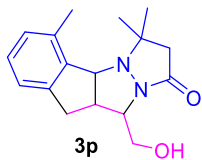

**10-(Hydroxymethyl)-3,3,5-trimethyl-2,3,4a,9,9a,10-hexahydro-1H-indeno[1,2-c]pyrazolo[1,2-a]pyrazol-1-one (3p)**

Eluent: petroleum ether/ethyl acetate (1:1). Orange solid (35.6 mg, 62%), mp 205.5-206.8 °C. <sup>1</sup>H NMR (400 MHz, CDCl<sub>3</sub>): δ 7.15 (t, *J* = 7.6 Hz, 1H), 7.04 (d, *J* = 7.2 Hz, 1H), 7.00 (d, *J* = 7.6 Hz, 1H), 5.30 (dd, *J*<sub>1</sub> = 10.4 Hz, *J*<sub>2</sub> = 3.6 Hz, 1H), 4.70 (d, *J* = 7.2 Hz, 1H), 4.08-4.01 (m, 1H), 3.96-3.90 (m, 1H), 3.22 (t, *J* = 8.8 Hz, 1H), 3.01 (dd, *J*<sub>1</sub> = 16.0 Hz, *J*<sub>2</sub> = 6.8 Hz, 1H), 2.84 (d, *J* = 15.2 Hz, 1H), 2.78-2.74 (m, 2H), 2.48 (s, 3H), 2.27 (d, *J* = 14.8 Hz, 1H), 1.52 (s, 3H), 1.25 (s, 3H). <sup>13</sup>C{<sup>1</sup>H} NMR (100 MHz, CDCl<sub>3</sub>): δ 167.1, 140.6, 139.6, 136.1, 129.4, 128.7, 123.2, 66.8, 65.2, 64.3, 61.6, 49.5, 46.7, 33.5, 26.5, 19.9, 19.3. HRMS (ESI) *m/z*: [M+H]<sup>+</sup> Calcd for C<sub>17</sub>H<sub>23</sub>N<sub>2</sub>O<sub>2</sub> 287.1754; Found 287.1746.

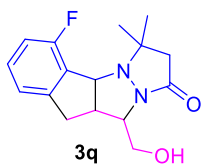

**5-Fluoro-10-(hydroxymethyl)-3,3-dimethyl-2,3,4a,9,9a,10-hexahydro-1H-indeno[1,2-c]pyrazolo[1,2-a]pyrazol-1-one (3q)**

Eluent: petroleum ether/ethyl acetate (1:1). White solid (38.5 mg, 66%), mp 186.7-187.7 °C. <sup>1</sup>H NMR (400 MHz, CDCl<sub>3</sub>): δ 7.28-7.23 (m, 1H), 7.01 (d, *J* = 7.2 Hz, 1H), 6.92 (t, *J* = 8.4 Hz, 1H), 5.49 (br s, 1H), 4.80 (d, *J* = 8.0 Hz, 1H), 4.01 (dd, *J*<sub>1</sub> = 12.4 Hz, *J*<sub>2</sub> = 2.4 Hz, 1H), 3.90 (dd, *J*<sub>1</sub> = 12.4 Hz, *J*<sub>2</sub> = 8.0 Hz, 1H), 3.39 (t, *J* = 8.4 Hz, 1H), 3.12 (dd, *J*<sub>1</sub> = 16.8 Hz, *J*<sub>2</sub> = 8.0 Hz, 1H), 2.95-2.89 (m, 2H), 2.86 (d, *J* = 16.0 Hz, 1H), 2.39 (d, *J* = 15.2 Hz, 1H), 1.47 (d, *J* = 2.0 Hz, 3H), 1.32 (s, 3H). <sup>13</sup>C{<sup>1</sup>H} NMR (150 MHz, CDCl<sub>3</sub>): δ 164.9, 160.1 (d, <sup>1</sup>*J*<sub>C-F</sub> = 248.3 Hz), 144.6 (d, <sup>3</sup>*J*<sub>C-F</sub> = 5.4 Hz), 130.8 (d, <sup>3</sup>*J*<sub>C-F</sub> = 7.8 Hz), 128.4 (d, <sup>2</sup>*J*<sub>C-F</sub> = 14.3 Hz), 121.2 (d, <sup>4</sup>*J*<sub>C-F</sub> = 3.3 Hz), 114.3 (d, <sup>2</sup>*J*<sub>C-F</sub> = 20.7 Hz), 64.4, 63.2, 62.1 (d, <sup>4</sup>*J*<sub>C-F</sub> = 2.3 Hz), 62.0, 50.0, 47.9, 35.1, 25.8 (d, <sup>3</sup>*J*<sub>C-F</sub> =

5.4 Hz), 19.6.  $^{19}\text{F}$  NMR (565 MHz,  $\text{CDCl}_3$ ):  $\delta$  -116.08 – -116.11 (m). HRMS (ESI)  $m/z$ :  $[\text{M}+\text{H}]^+$  Calcd for  $\text{C}_{16}\text{H}_{20}\text{FN}_2\text{O}_2$  291.1503; Found 291.1502.

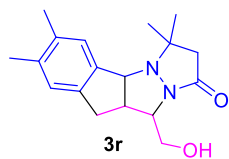

**10-(Hydroxymethyl)-3,3,6,7-tetramethyl-2,3,4a,9,9a,10-hexahydro-1H-indeno[1,2-c]pyrazolo[1,2-a]pyrazol-1-one (3r)**

Eluent: petroleum ether/ethyl acetate (1:1). Yellow solid (38.9 mg, 65%), mp 181.5-182.1 °C.  $^1\text{H}$  NMR (600 MHz,  $\text{CDCl}_3$ ):  $\delta$  7.01 (s, 1H), 7.00 (s, 1H), 5.56 (dd,  $J_1 = 10.8$  Hz,  $J_2 = 3.0$  Hz, 1H), 4.59 (d,  $J = 8.4$  Hz, 1H), 4.02-3.98 (m, 1H), 3.91-3.87 (m, 1H), 3.25 (t,  $J = 9.0$  Hz, 1H), 3.05 (dd,  $J_1 = 16.2$  Hz,  $J_2 = 7.2$  Hz, 1H), 2.84-2.81 (m, 2H), 2.74 (d,  $J = 16.2$  Hz, 1H), 2.39 (d,  $J = 15.6$  Hz, 1H), 2.26 (s, 3H), 2.24 (s, 3H), 1.53 (s, 3H), 1.28 (s, 3H).  $^{13}\text{C}\{^1\text{H}\}$  NMR (150 MHz,  $\text{CDCl}_3$ ):  $\delta$  164.9, 140.0, 137.8, 137.1, 136.2, 126.4, 126.0, 63.91, 63.89, 63.7, 61.8, 49.7, 47.1, 34.0, 26.4, 19.94, 19.88, 19.7. HRMS (ESI)  $m/z$ :  $[\text{M}+\text{H}]^+$  Calcd for  $\text{C}_{18}\text{H}_{25}\text{N}_2\text{O}_2$  301.1911; Found 301.1903.

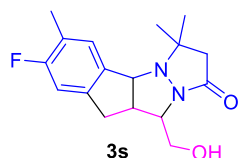

**7-Fluoro-10-(hydroxymethyl)-3,3,6-trimethyl-2,3,4a,9,9a,10-hexahydro-1H-indeno[1,2-c]pyrazolo[1,2-a]pyrazol-1-one (3s)**

Eluent: petroleum ether/ethyl acetate (1:1). White solid (37.1 mg, 61%), mp 181.4-182.4 °C.  $^1\text{H}$  NMR (600 MHz,  $\text{CDCl}_3$ ):  $\delta$  7.04 (d,  $J = 7.2$  Hz, 1H), 6.86 (d,  $J = 9.6$  Hz, 1H), 5.46 (dd,  $J_1 = 10.8$  Hz,  $J_2 = 3.0$  Hz, 1H), 4.58 (d,  $J = 7.8$  Hz, 1H), 4.03-3.99 (m, 1H), 3.91-3.87 (m, 1H), 3.25 (t,  $J = 9.0$  Hz, 1H), 3.07 (dd,  $J_1 = 16.2$  Hz,  $J_2 = 7.2$  Hz, 1H), 2.88-2.83 (m, 2H), 2.76 (d,  $J = 16.2$  Hz, 1H), 2.39 (d,  $J = 15.0$  Hz, 1H), 2.27 (s, 3H), 1.52 (s, 3H), 1.28 (s, 3H).  $^{13}\text{C}\{^1\text{H}\}$  NMR (150 MHz,  $\text{CDCl}_3$ ):  $\delta$  165.0, 161.7 (d,  $^1J_{\text{C-F}} = 243.9$  Hz), 139.5 (d,  $^3J_{\text{C-F}} = 8.7$  Hz), 137.8 (d,  $^4J_{\text{C-F}} = 2.3$  Hz), 127.7 (d,  $^3J_{\text{C-F}} = 5.4$  Hz), 124.6 (d,  $^2J_{\text{C-F}} = 18.5$  Hz), 111.8 (d,  $^2J_{\text{C-F}} = 23.1$  Hz),

63.81, 63.78, 63.5, 61.5, 49.6, 47.3, 34.0 (d,  $^4J_{C-F} = 2.3$  Hz), 26.4, 19.7, 14.8 (d,  $^3J_{C-F} = 4.4$  Hz).  $^{19}\text{F}$  NMR (565 MHz,  $\text{CDCl}_3$ ):  $\delta$  -117.93 – -117.96 (m). HRMS (ESI)  $m/z$ :  $[\text{M}+\text{H}]^+$  Calcd for  $\text{C}_{17}\text{H}_{22}\text{FN}_2\text{O}_2$  305.1660; Found 305.1655.

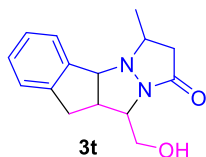

**10-(Hydroxymethyl)-3-methyl-2,3,4a,9,9a,10-hexahydro-1H-indeno[1,2-c]pyrazolo[1,2-a]pyrazol-1-one**  
**(3t)**

Eluent: petroleum ether/ethyl acetate (1:1). White solid (34.6 mg, 67%), mp 123.7-124.6 °C.  $^1\text{H}$  NMR (600 MHz,  $\text{CDCl}_3$ ):  $\delta$  7.32-7.30 (m, 1H), 7.29-7.27 (m, 2H), 7.25-7.23 (m, 1H), 5.43-5.41 (m, 1H), 4.34 (d,  $J = 8.4$  Hz, 1H), 4.04-4.00 (m, 1H), 3.93-3.90 (m, 1H), 3.46-3.41 (m, 1H), 3.39-3.35 (m, 1H), 3.15 (dd,  $J_1 = 16.2$  Hz,  $J_2 = 7.8$  Hz, 1H), 3.06-3.01 (m, 1H), 2.89 (dd,  $J_1 = 16.8$  Hz,  $J_2 = 2.4$  Hz, 1H), 2.74 (dd,  $J_1 = 15.6$  Hz,  $J_2 = 7.2$  Hz, 1H), 2.65-2.60 (m, 1H), 1.50 (d,  $J = 6.0$  Hz, 3H).  $^{13}\text{C}\{^1\text{H}\}$  NMR (150 MHz,  $\text{CDCl}_3$ ): 164.8, 141.3, 141.2, 128.8, 127.6, 125.6, 125.4, 73.4, 64.3, 63.2, 61.6, 46.8, 43.2, 34.8, 18.7. HRMS (ESI)  $m/z$ :  $[\text{M}+\text{H}]^+$  Calcd for  $\text{C}_{15}\text{H}_{19}\text{N}_2\text{O}_2$  259.1441; Found 259.1437.

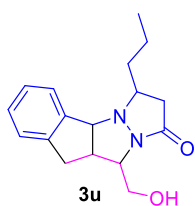

**10-(Hydroxymethyl)-3-propyl-2,3,4a,9,9a,10-hexahydro-1H-indeno[1,2-c]pyrazolo[1,2-a]pyrazol-1-one**  
**(3u)**

Eluent: petroleum ether/ethyl acetate (1:1). Orange solid (33.1 mg, 58%), mp 120.7-121.1 °C.  $^1\text{H}$  NMR (600 MHz,  $\text{CDCl}_3$ ):  $\delta$  7.31-7.28 (m, 3H), 7.24-7.23 (m, 1H), 5.38 (dd,  $J_1 = 10.2$  Hz,  $J_2 = 3.6$  Hz, 1H), 4.36 (d,  $J = 9.0$  Hz, 1H), 4.05-4.01 (m, 1H), 3.93-3.89 (m, 1H), 3.37-3.32 (m, 2H), 3.14 (dd,  $J_1 = 16.2$  Hz,  $J_2 = 7.8$  Hz, 1H), 3.04-3.00 (m, 1H), 2.87 (d,  $J = 16.2$  Hz, 1H), 2.73 (dd,  $J_1 = 16.2$  Hz,  $J_2 = 7.2$  Hz, 1H), 2.63-2.58 (m, 1H),

1.96-1.90 (m, 1H), 1.76-1.70 (m, 1H), 1.49-1.37 (m, 2H), 1.03 (t,  $J = 7.2$  Hz, 3H).  $^{13}\text{C}\{^1\text{H}\}$  NMR (150 MHz,  $\text{CDCl}_3$ ):  $\delta$  165.0, 141.4, 141.2, 128.8, 127.6, 125.6, 125.4, 73.5, 67.6, 64.1, 61.5, 46.6, 41.0, 35.7, 34.6, 19.2, 14.2. HRMS (ESI)  $m/z$ :  $[\text{M}+\text{H}]^+$  Calcd for  $\text{C}_{17}\text{H}_{23}\text{N}_2\text{O}_2$  287.1754; Found 287.1753.

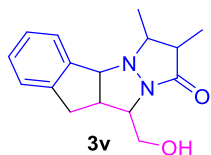

**10-(Hydroxymethyl)-2,3-dimethyl-2,3,4a,9,9a,10-hexahydro-1H-indeno[1,2-c]pyrazolo[1,2-a]pyrazol-1-one (3v)**

Eluent: petroleum ether/ethyl acetate (1:1). White solid (30.6 mg, 56%), mp 126.3-127.6 °C.  $^1\text{H}$  NMR (600 MHz,  $\text{CDCl}_3$ ):  $\delta$  7.33-7.32 (m, 1H), 7.29-7.28 (m, 2H), 7.25-7.23 (m, 1H), 5.47 (dd,  $J_1 = 10.8$  Hz,  $J_2 = 4.2$  Hz, 1H), 4.32 (d,  $J = 8.4$  Hz, 1H), 4.05-4.01 (m, 1H), 3.91-3.87 (m, 1H), 3.38 (t,  $J = 8.4$  Hz, 1H), 3.15 (dd,  $J_1 = 16.8$  Hz,  $J_2 = 8.4$  Hz, 1H), 3.04-3.00 (m, 1H), 2.93-2.88 (m, 2H), 2.60-2.57 (m, 1H), 1.50 (d,  $J = 6.0$  Hz, 3H), 1.22 (d,  $J = 6.6$  Hz, 3H).  $^{13}\text{C}\{^1\text{H}\}$  NMR (150 MHz,  $\text{CDCl}_3$ ):  $\delta$  167.1, 141.3, 141.2, 128.8, 127.6, 125.6, 125.5, 73.3, 70.6, 64.2, 61.6, 47.8, 46.6, 34.7, 17.3, 12.1. HRMS (ESI)  $m/z$ :  $[\text{M}+\text{H}]^+$  Calcd for  $\text{C}_{16}\text{H}_{21}\text{N}_2\text{O}_2$  273.1598; Found 273.1589.

## 2. Optimization study for the formation of 5a<sup>a</sup>

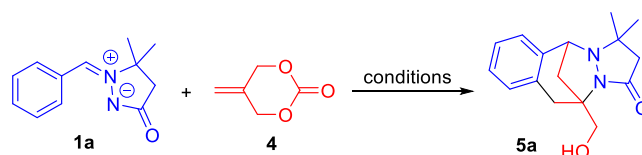

| Entry           | Catalyst (mol%)                                                 | Additive                        | Solvent | T (°C) | Yield (%) <sup>b</sup> |
|-----------------|-----------------------------------------------------------------|---------------------------------|---------|--------|------------------------|
| 1 <sup>c</sup>  | [RhCp*(MeCN) <sub>3</sub> ](SbF <sub>6</sub> ) <sub>2</sub> (5) | AgSbF <sub>6</sub>              | TFE     | 120    | 21                     |
| 2               | [RhCp*(MeCN) <sub>3</sub> ](SbF <sub>6</sub> ) <sub>2</sub> (5) | AgSbF <sub>6</sub>              | TFE     | 120    | 40                     |
| 3               | [RhCp*Cl <sub>2</sub> ] <sub>2</sub> (5)                        | AgSbF <sub>6</sub>              | TFE     | 120    | 15                     |
| 4               | CoCp*(CO)I <sub>2</sub> (5)                                     | AgSbF <sub>6</sub>              | TFE     | 120    | ND                     |
| 5               | [IrCp*Cl <sub>2</sub> ] <sub>2</sub> (5)                        | AgSbF <sub>6</sub>              | TFE     | 120    | trace                  |
| 6               | [Ru( <i>p</i> -cymene)Cl <sub>2</sub> ] <sub>2</sub> (5)        | AgSbF <sub>6</sub>              | TFE     | 120    | 50                     |
| 7               | [Ru( <i>p</i> -cymene)Cl <sub>2</sub> ] <sub>2</sub> (5)        | AgSbF <sub>6</sub>              | DCE     | 120    | trace                  |
| 8               | [Ru( <i>p</i> -cymene)Cl <sub>2</sub> ] <sub>2</sub> (5)        | AgSbF <sub>6</sub>              | MeOH    | 120    | trace                  |
| 9               | [Ru( <i>p</i> -cymene)Cl <sub>2</sub> ] <sub>2</sub> (5)        | AgSbF <sub>6</sub>              | HFIP    | 120    | 65                     |
| 10              | [Ru( <i>p</i> -cymene)Cl <sub>2</sub> ] <sub>2</sub> (2.5)      | AgSbF <sub>6</sub>              | HFIP    | 120    | 66                     |
| 11              | [Ru( <i>p</i> -cymene)Cl <sub>2</sub> ] <sub>2</sub> (2.5)      | AgSbF <sub>6</sub>              | HFIP    | 60     | 53                     |
| 12              | [Ru( <i>p</i> -cymene)Cl <sub>2</sub> ] <sub>2</sub> (2.5)      | AgSbF <sub>6</sub>              | HFIP    | 80     | 72                     |
| 13              | [Ru( <i>p</i> -cymene)Cl <sub>2</sub> ] <sub>2</sub> (2.5)      | AgSbF <sub>6</sub>              | HFIP    | 100    | 70                     |
| 14              | [Ru( <i>p</i> -cymene)Cl <sub>2</sub> ] <sub>2</sub> (2.5)      | AgBF <sub>4</sub>               | HFIP    | 80     | 65                     |
| 15              | [Ru( <i>p</i> -cymene)Cl <sub>2</sub> ] <sub>2</sub> (2.5)      | Ag <sub>2</sub> CO <sub>3</sub> | HFIP    | 80     | 22                     |
| 16              | [Ru( <i>p</i> -cymene)Cl <sub>2</sub> ] <sub>2</sub> (2.5)      | AgOAc                           | HFIP    | 80     | 20                     |
| 17              | [Ru( <i>p</i> -cymene)Cl <sub>2</sub> ] <sub>2</sub> (2.5)      | Cu(OAc) <sub>2</sub>            | HFIP    | 80     | 11                     |
| 18              | [Ru( <i>p</i> -cymene)Cl <sub>2</sub> ] <sub>2</sub> (2.5)      | NaOAc                           | HFIP    | 80     | 67                     |
| 19 <sup>d</sup> | [Ru( <i>p</i> -cymene)Cl <sub>2</sub> ] <sub>2</sub> (2.5)      | AgSbF <sub>6</sub>              | HFIP    | 80     | 76                     |
| 20              |                                                                 | AgSbF <sub>6</sub>              | HFIP    | 80     | ND                     |
| 21              | [Ru( <i>p</i> -cymene)Cl <sub>2</sub> ] <sub>2</sub> (2.5)      |                                 | HFIP    | 80     | trace                  |
| 22 <sup>e</sup> | [Ru( <i>p</i> -cymene)Cl <sub>2</sub> ] <sub>2</sub> (2.5)      | AgSbF <sub>6</sub>              | HFIP    | 80     | 75                     |

<sup>a</sup>Reaction conditions: **1a** (0.2 mmol), **4** (0.3 mmol), additive (0.02 mmol), solvent (2 mL), argon, 6 h.

<sup>b</sup>Isolated yields. <sup>c</sup>Under air. <sup>d</sup>**4** (0.4 mmol). <sup>e</sup>8 h.



### 3. Typical procedure for the synthesis of 5a and spectroscopic data of 5a-5u

To a reaction tube equipped with a stir bar were charged with 2-benzylidene-3,3-dimethyl-5-oxopyrazolidin-2-ium-1-ide (**1a**, 40.4 mg, 0.2 mmol), 5-methylene-1,3-dioxan-2-one (**4**, 45.6 mg, 0.4 mmol), [Ru(*p*-cymene)Cl<sub>2</sub>]<sub>2</sub> (3.1 mg, 0.005 mmol), AgSbF<sub>6</sub> (6.9 mg, 0.02 mmol) and HFIP (2 mL). The mixture was stirred at 80 °C under argon for 6 h. Upon completion, it was cooled to room temperature, filtered through a pad of celite, and concentrated under reduced pressure. The residue was purified by silica gel chromatography using petroleum ether/ethyl acetate (1:1) as eluent to afford **5a**. **5b-5u** were obtained in a similar manner.

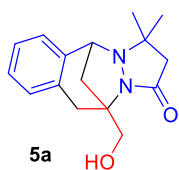

#### 11-(Hydroxymethyl)-3,3-dimethyl-2,3,10,11-tetrahydro-1*H*,5*H*-5,11-methanobenzo[*d*]pyrazolo[1,2-*a*][1,2]diazepin-1-one (**5a**)

Eluent: petroleum ether/ethyl acetate (1:1). White solid (41.5 mg, 76%), mp 172.6-173.4 °C. <sup>1</sup>H NMR (600 MHz, CDCl<sub>3</sub>): δ 7.23 (td, *J*<sub>1</sub> = 7.2 Hz, *J*<sub>2</sub> = 0.6 Hz, 1H), 7.18 (d, *J* = 7.2 Hz, 1H), 7.15 (t, *J* = 7.2 Hz, 1H), 7.07 (d, *J* = 7.2 Hz, 1H), 5.21 (dd, *J*<sub>1</sub> = 9.6 Hz, *J*<sub>2</sub> = 4.8 Hz, 1H), 4.12 (d, *J* = 5.4 Hz, 1H), 4.08-4.05 (m, 2H), 3.50 (d, *J* = 17.4 Hz, 1H), 2.99 (d, *J* = 17.4 Hz, 1H), 2.60 (d, *J* = 15.0 Hz, 1H), 2.32 (d, *J* = 15.6 Hz, 1H), 2.26 (dd, *J*<sub>1</sub> = 11.4 Hz, *J*<sub>2</sub> = 4.8 Hz, 1H), 1.87 (d, *J* = 10.8 Hz, 1H), 1.22 (s, 3H) 1.15 (s, 3H). <sup>13</sup>C{<sup>1</sup>H} NMR (150 MHz, CDCl<sub>3</sub>): δ 166.8, 140.4, 133.5, 129.7, 128.2, 126.2, 126.1, 65.9, 65.8, 64.5, 56.0, 49.4, 38.7, 38.3, 24.9, 21.5.

HRMS (ESI) *m/z*: [M+H]<sup>+</sup> Calcd for C<sub>16</sub>H<sub>21</sub>N<sub>2</sub>O<sub>2</sub> 273.1598; Found 273.1595.

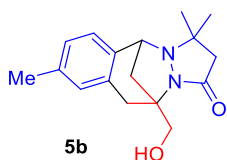

#### 11-(Hydroxymethyl)-3,3,8-trimethyl-2,3,10,11-tetrahydro-1*H*,5*H*-5,11-methanobenzo[*d*]pyrazolo[1,2-*a*][1,2]diazepin-1-one (**5b**)

Eluent: petroleum ether/ethyl acetate (1:1). White solid (48.0 mg, 84%), mp 187.0-187.8 °C. <sup>1</sup>H NMR (600 MHz, CDCl<sub>3</sub>): δ 7.00 (s, 1H), 6.96 (s, 2H), 5.21 (br s, 1H), 4.10 (d, *J* = 5.4 Hz, 1H), 4.07-4.02 (m, 2H), 3.47 (d, *J* = 18.0 Hz, 1H), 2.94 (d, *J* = 18.0 Hz, 1H), 2.58 (d, *J* = 15.0 Hz, 1H), 2.33-2.30 (m, 4H), 2.25 (dd, *J*<sub>1</sub> = 10.8 Hz, *J*<sub>2</sub> = 4.8 Hz, 1H), 1.85 (d, *J* = 10.8 Hz, 1H), 1.21 (s, 3H) 1.14 (s, 3H). <sup>13</sup>C{<sup>1</sup>H} NMR (150 MHz, CDCl<sub>3</sub>): δ 166.8, 138.0, 137.5, 133.2, 130.4, 126.9, 126.0, 66.0, 65.9, 64.5, 55.7, 49.4, 38.9, 38.2, 24.9, 21.7, 21.2. HRMS (ESI) *m/z*: [M+H]<sup>+</sup> Calcd for C<sub>17</sub>H<sub>23</sub>N<sub>2</sub>O<sub>2</sub> 287.1754; Found 287.1749.

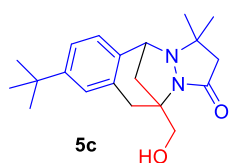

**8-(*tert*-Butyl)-11-(hydroxymethyl)-3,3-dimethyl-2,3,10,11-tetrahydro-1*H*,5*H*-5,11-methanobenzo[*d*]pyrazolo[1,2-*a*][1,2]diazepin-1-one (5c)**

Eluent: petroleum ether/ethyl acetate (1:1). Yellowish solid (44.2 mg, 67%), mp 226.8-227.4 °C. <sup>1</sup>H NMR (600 MHz, CDCl<sub>3</sub>): δ 7.18 (s, 1H), 7.16 (d, *J* = 7.8 Hz, 1H), 7.00 (d, *J* = 7.8 Hz, 1H), 5.16 (t, *J* = 7.8 Hz, 1H), 4.10 (d *J* = 4.2 Hz, 1H), 4.06 (d, *J* = 7.2 Hz, 2H), 3.48 (d, *J* = 17.4 Hz, 1H), 2.98 (d, *J* = 18.0 Hz, 1H), 2.62 (d, *J* = 15.0 Hz, 1H), 2.31 (d, *J* = 15.0 Hz, 1H), 2.25 (dd, *J*<sub>1</sub> = 10.8 Hz, *J*<sub>2</sub> = 4.2 Hz, 1H), 1.85 (d, *J* = 11.4 Hz, 1H), 1.28 (s, 9H), 1.21 (s, 3H) 1.16 (s, 3H). <sup>13</sup>C{<sup>1</sup>H} NMR (150 MHz, CDCl<sub>3</sub>): δ 167.0, 151.1, 137.5, 132.7, 126.6, 125.6, 123.2, 66.2, 65.8, 64.5, 55.6, 49.4, 38.7, 38.4, 34.5, 31.4, 24.9, 21.5. HRMS (ESI) *m/z*: [M+H]<sup>+</sup> Calcd for C<sub>20</sub>H<sub>29</sub>N<sub>2</sub>O<sub>2</sub> 329.2224; Found 329.2214.

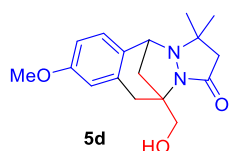

**11-(Hydroxymethyl)-8-methoxy-3,3-dimethyl-2,3,10,11-tetrahydro-1*H*,5*H*-5,11-methanobenzo[*d*]pyrazolo[1,2-*a*][1,2]diazepin-1-one (5d)**

Eluent: petroleum ether/ethyl acetate (1:1). Yellowish solid (47.1 mg, 78%), mp 138.3-139.3 °C. <sup>1</sup>H NMR (600 MHz, CDCl<sub>3</sub>): δ 6.99 (d, *J* = 7.8 Hz, 1H), 6.72 (s, 1H), 6.69 (dd, *J*<sub>1</sub> = 8.4 Hz, *J*<sub>2</sub> = 1.8 Hz, 1H), 5.23 (br s,

1H), 4.10 (d  $J = 4.8$  Hz, 1H), 4.07-4.01 (m, 2H), 3.77 (s, 3H), 3.51 (d,  $J = 17.4$  Hz, 1H), 2.96 (d,  $J = 18.0$  Hz, 1H), 2.56 (d,  $J = 15.6$  Hz, 1H), 2.35 (d,  $J = 15.0$  Hz, 1H), 2.27 (dd,  $J_1 = 10.8$  Hz,  $J_2 = 4.8$  Hz, 1H), 1.85 (d,  $J = 10.8$  Hz, 1H), 1.22 (s, 3H) 1.11 (s, 3H).  $^{13}\text{C}\{^1\text{H}\}$  NMR (150 MHz,  $\text{CDCl}_3$ ):  $\delta$  166.8, 159.5, 134.9, 132.6, 127.3, 114.8, 111.9, 66.0, 65.7, 64.3, 55.5, 55.3, 49.5, 39.3, 38.5, 24.7, 22.0. HRMS (ESI)  $m/z$ :  $[\text{M}+\text{H}]^+$  Calcd for  $\text{C}_{17}\text{H}_{23}\text{N}_2\text{O}_3$  303.1703; Found 303.1701.

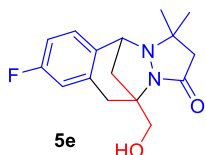

**8-Fluoro-11-(hydroxymethyl)-3,3-dimethyl-2,3,10,11-tetrahydro-1H,5H-5,11-methanobenzo[d]pyrazolo[1,2-a][1,2]diazepin-1-one (5e)**

Eluent: petroleum ether/ethyl acetate (1:1). Yellowish solid (29.0 mg, 50%), mp 219.3-220.0 °C.  $^1\text{H}$  NMR (600 MHz,  $\text{CDCl}_3$ ):  $\delta$  7.04 (dd,  $J_1 = 8.4$  Hz,  $J_2 = 6.0$ , 1H), 6.89 (d,  $J = 9.6$  Hz, 1H), 6.85 (td,  $J_1 = 8.4$  Hz,  $J_2 = 2.4$  Hz, 1H), 5.16 (br s, 1H), 4.13 (d,  $J = 4.8$  Hz, 1H), 4.09-4.05 (m, 2H), 3.49 (d,  $J = 18.0$  Hz, 1H), 2.97 (d,  $J = 18.0$  Hz, 1H), 2.61 (d,  $J = 15.0$  Hz, 1H), 2.33 (d,  $J = 15.0$  Hz, 1H), 2.27 (dd,  $J_1 = 10.8$  Hz,  $J_2 = 4.8$  Hz, 1H), 1.84 (d,  $J = 11.4$  Hz, 1H), 1.22 (s, 3H) 1.16 (s, 3H).  $^{13}\text{C}\{^1\text{H}\}$  NMR (150 MHz,  $\text{CDCl}_3$ ):  $\delta$  166.9, 162.4 (d,  $^1J_{\text{C-F}} = 245.0$  Hz), 136.4, 135.9 (d,  $^3J_{\text{C-F}} = 7.7$  Hz), 127.5 (d,  $^3J_{\text{C-F}} = 8.7$  Hz), 116.5 (d,  $^2J_{\text{C-F}} = 21.9$  Hz), 113.1 (d,  $^2J_{\text{C-F}} = 20.7$  Hz), 65.61, 65.59, 64.6, 55.3, 49.3, 38.8, 38.5, 25.0, 21.5.  $^{19}\text{F}$  NMR (376 MHz,  $\text{CDCl}_3$ ):  $\delta$  -114.04 – -114.10 (m). HRMS (ESI)  $m/z$ :  $[\text{M}+\text{H}]^+$  Calcd for  $\text{C}_{16}\text{H}_{20}\text{FN}_2\text{O}_2$  291.1503; Found 291.1501.

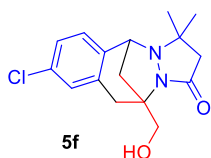

**8-Chloro-11-(hydroxymethyl)-3,3-dimethyl-2,3,10,11-tetrahydro-1H,5H-5,11-methanobenzo[d]pyrazolo[1,2-a][1,2]diazepin-1-one (5f)**

Eluent: petroleum ether/ethyl acetate (1:1). White solid (34.2 mg, 56%), mp 208.4-209.4 °C.  $^1\text{H}$  NMR (600 MHz,  $\text{DMSO}-d_6$ ):  $\delta$  7.24 (s, 1H), 7.23 (d,  $J = 7.8$  Hz, 1H), 7.18 (dd,  $J_1 = 7.8$  Hz,  $J_2 = 1.8$  Hz, 1H), 5.16 (br s,

1H), 4.39 (d,  $J = 4.2$  Hz, 1H), 3.94 (s, 2H), 3.13 (d,  $J = 17.4$  Hz, 1H), 3.00 (d,  $J = 17.4$  Hz, 1H), 2.36 (d,  $J = 15.0$  Hz, 1H), 2.19 (dd,  $J_1 = 11.4$  Hz,  $J_2 = 4.8$  Hz, 1H), 2.15 (d,  $J = 15.6$  Hz, 1H), 1.80 (d,  $J = 10.8$  Hz, 1H), 1.14 (s, 3H) 1.11 (s, 3H).  $^{13}\text{C}\{^1\text{H}\}$  NMR (150 MHz, DMSO- $d_6$ ):  $\delta$  167.4, 140.4, 137.0, 132.2, 129.3, 128.5, 126.1, 65.6, 64.2, 63.8, 54.7, 48.9, 38.6, 38.0, 25.1, 21.9. HRMS (ESI)  $m/z$ :  $[\text{M}+\text{H}]^+$  Calcd for  $\text{C}_{16}\text{H}_{20}\text{ClN}_2\text{O}_2$  307.1208; Found 307.1206.

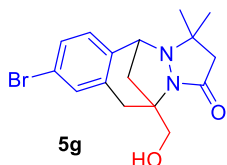

**8-Bromo-11-(hydroxymethyl)-3,3-dimethyl-2,3,10,11-tetrahydro-1H,5H-5,11-methanobenzo[d]pyrazolo[1,2-a][1,2]diazepin-1-one (5g)**

Eluent: petroleum ether/ethyl acetate (1:1). Yellow solid (41.8 mg, 60%), mp 198.5-199.4 °C.  $^1\text{H}$  NMR (400 MHz,  $\text{CDCl}_3$ ):  $\delta$  7.33 (s, 1H), 7.30-7.27 (m, 1H), 6.95 (d,  $J = 8.0$  Hz, 1H), 5.13 (br s, 1H), 4.11 (d,  $J = 4.8$  Hz, 1H), 4.06 (s, 2H), 3.47 (d,  $J = 18.0$  Hz, 1H), 2.95 (d,  $J = 18.0$  Hz, 1H), 2.61 (d,  $J = 15.2$  Hz, 1H), 2.31 (d,  $J = 15.2$  Hz, 1H), 2.28-2.24 (m, 1H), 1.82 (d,  $J = 10.8$  Hz, 1H), 1.21 (s, 3H) 1.17 (s, 3H).  $^{13}\text{C}\{^1\text{H}\}$  NMR (100 MHz,  $\text{CDCl}_3$ ):  $\delta$  166.9, 139.5, 135.9, 132.6, 129.4, 127.5, 121.8, 65.7, 65.5, 64.7, 55.4, 49.2, 38.4, 38.2, 25.1, 21.3. HRMS (ESI)  $m/z$ :  $[\text{M}+\text{H}]^+$  Calcd for  $\text{C}_{16}\text{H}_{20}\text{BrN}_2\text{O}_2$  351.0703; Found 351.0695.

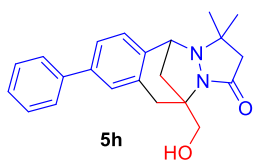

**11-(Hydroxymethyl)-3,3-dimethyl-8-phenyl-2,3,10,11-tetrahydro-1H,5H-5,11-methanobenzo[d]pyrazolo[1,2-a][1,2]diazepin-1-one (5h)**

Eluent: petroleum ether/ethyl acetate (1:1). White solid (45.9 mg, 66%), mp 185.3-186.1 °C.  $^1\text{H}$  NMR (400 MHz,  $\text{CDCl}_3$ ):  $\delta$  7.55-7.52 (m, 2H), 7.44-7.32 (m, 5H), 7.14 (d,  $J = 7.6$  Hz, 1H), 5.18 (t,  $J = 7.2$  Hz, 1H), 4.18 (d,  $J = 4.8$  Hz, 1H), 4.09 (d,  $J = 6.8$  Hz, 1H), 3.57 (d,  $J = 17.6$  Hz, 1H), 3.05 (d,  $J = 17.6$  Hz, 1H), 2.65 (d,  $J = 15.2$  Hz, 1H), 2.35-2.28 (m, 3H), 1.90 (d,  $J = 11.2$  Hz, 1H), 1.24 (s, 3H) 1.21 (s, 3H).  $^{13}\text{C}\{^1\text{H}\}$  NMR (150

MHz, CDCl<sub>3</sub>):  $\delta$  167.0, 141.3, 140.7, 139.6, 133.9, 128.8, 128.5, 127.4, 127.1, 126.4, 125.2, 66.1, 65.7, 64.7, 55.7, 49.4, 38.7, 38.5, 25.1, 21.4. HRMS (ESI)  $m/z$ : [M+Na]<sup>+</sup> Calcd for C<sub>22</sub>H<sub>24</sub>N<sub>2</sub>NaO<sub>2</sub> 371.1730; Found 371.1726.

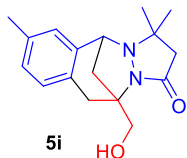

**11-(Hydroxymethyl)-3,3,7-trimethyl-2,3,10,11-tetrahydro-1H,5H-5,11-methanobenzo[d]pyrazolo[1,2-a][1,2]diazepin-1-one (5i)**

Eluent: petroleum ether/ethyl acetate (1:1). Yellow solid (50.9 mg, 89%), mp 178.9-179.5 °C. <sup>1</sup>H NMR (600 MHz, CDCl<sub>3</sub>):  $\delta$  7.06 (d,  $J$  = 7.2 Hz, 1H), 7.04 (d,  $J$  = 7.8 Hz, 1H), 6.88 (s, 1H), 5.20 (br s, 1H), 4.07-4.05 (m, 3H), 3.44 (d,  $J$  = 17.4 Hz, 1H), 2.93 (d,  $J$  = 18.0 Hz, 1H), 2.60 (d,  $J$  = 15.0 Hz, 1H), 2.31-2.29 (m, 4H), 2.24 (dd,  $J_1$  = 11.4 Hz,  $J_2$  = 4.8 Hz, 1H), 1.84 (d,  $J$  = 11.4 Hz, 1H), 1.21 (s, 3H) 1.17 (s, 3H). <sup>13</sup>C{<sup>1</sup>H} NMR (150 MHz, CDCl<sub>3</sub>):  $\delta$  166.9, 140.3, 135.9, 130.2, 129.6, 128.9, 126.7, 66.2, 65.8, 64.7, 56.0, 49.4, 38.7, 37.9, 24.9, 21.4, 21.0. HRMS (ESI)  $m/z$ : [M+H]<sup>+</sup> Calcd for C<sub>17</sub>H<sub>23</sub>N<sub>2</sub>O<sub>2</sub> 287.1754; Found 287.1745.

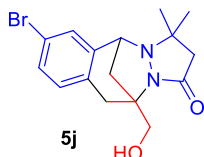

**7-Bromo-11-(hydroxymethyl)-3,3-dimethyl-2,3,10,11-tetrahydro-1H,5H-5,11-methanobenzo[d]pyrazolo[1,2-a][1,2]diazepin-1-one (5j)**

Eluent: petroleum ether/ethyl acetate (1:1). White solid (38.6 mg, 55%), mp 206.8-207.4 °C. <sup>1</sup>H NMR (600 MHz, CDCl<sub>3</sub>):  $\delta$  7.35 (dd,  $J_1$  = 7.8 Hz,  $J_2$  = 1.8 Hz, 1H), 7.22 (d,  $J$  = 1.8 Hz, 1H), 7.06 (d,  $J$  = 7.8 Hz, 1H), 5.12 (br s, 1H), 4.08-4.06 (m, 3H), 3.42 (d,  $J$  = 18.0 Hz, 1H), 2.91 (d,  $J$  = 18.0 Hz, 1H), 2.63 (d,  $J$  = 15.6 Hz, 1H), 2.31 (d,  $J$  = 15.0 Hz, 1H), 2.25 (dd,  $J_1$  = 11.4 Hz,  $J_2$  = 5.4 Hz, 1H), 1.83 (d,  $J$  = 11.4 Hz, 1H), 1.21 (s, 3H) 1.19 (s, 3H). <sup>13</sup>C{<sup>1</sup>H} NMR (150 MHz, CDCl<sub>3</sub>):  $\delta$  166.9, 142.6, 132.5, 131.4, 131.0, 128.8, 119.7, 65.8, 65.5,

64.8, 55.6, 49.2, 38.3, 38.0, 25.1, 21.2. HRMS (ESI)  $m/z$ :  $[M+H]^+$  Calcd for  $C_{16}H_{20}BrN_2O_2$  351.0703; Found 351.0698.

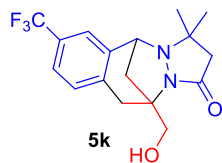

**11-(Hydroxymethyl)-3,3-dimethyl-7-(trifluoromethyl)-2,3,10,11-tetrahydro-1H,5H-5,11-methanobenzo[d]pyrazolo[1,2-a][1,2]diazepin-1-one (5k)**

Eluent: petroleum ether/ethyl acetate (1:1). White solid (27.3 mg, 40%), mp 176.4-177.2 °C.  $^1H$  NMR (600 MHz,  $CDCl_3$ ):  $\delta$  7.49 (d,  $J = 7.8$  Hz, 1H), 7.32 (s, 1H), 7.30 (d,  $J = 7.8$  Hz, 1H), 5.12 (dd,  $J_1 = 9.6$  Hz,  $J_2 = 5.4$  Hz, 1H), 4.19 (d,  $J = 4.8$  Hz, 1H), 4.01-4.08 (m, 2H), 3.54 (d,  $J = 18.6$  Hz, 1H), 3.03 (d,  $J = 18.0$  Hz, 1H), 2.65 (d,  $J = 15.6$  Hz, 1H), 2.33-2.28 (m, 2H), 1.85 (d,  $J = 11.4$  Hz, 1H), 1.23 (s, 3H), 1.20 (s, 3H).  $^{13}C\{^1H\}$  NMR (150 MHz,  $CDCl_3$ ):  $\delta$  167.0, 141.4, 137.9, 130.2, 128.6 (q,  $^2J_{C-F} = 32.9$  Hz), 124.9 (q,  $^3J_{C-F} = 3.3$  Hz), 124.0 (q,  $^1J_{C-F} = 270.2$  Hz), 122.6 (q,  $^3J_{C-F} = 4.4$  Hz), 65.8, 65.4, 64.9, 64.8, 55.6, 49.2, 38.5, 38.2, 25.2, 21.1.  $^{19}F$  NMR (565 MHz,  $CDCl_3$ ):  $\delta$  -62.4 (s). HRMS (ESI)  $m/z$ :  $[M+H]^+$  Calcd for  $C_{17}H_{20}F_3N_2O_2$  341.1471; Found 341.1462.

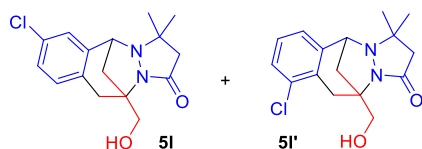

**7-Chloro-11-(hydroxymethyl)-3,3-dimethyl-2,3,10,11-tetrahydro-1H,5H-5,11-methanobenzo[d]pyrazolo[1,2-a][1,2]diazepin-1-one and 9-Chloro-11-(hydroxymethyl)-3,3-dimethyl-2,3,10,11-tetrahydro-1H,5H-5,11-methanobenzo[d]pyrazolo[1,2-a][1,2]diazepin-1-one (5l and 5l' as 1:1 mixture of diastereoisomers)**

Eluent: petroleum ether/ethyl acetate (1:1). Yellow solid (40.5 mg, 66%, the ratio of two isomers = 1:1).  $^1H$  NMR (400 MHz,  $CDCl_3$ ):  $\delta$  7.29-7.27 (m, 1H), 7.20 (dd,  $J_1 = 8.0$  Hz,  $J_2 = 2.0$  Hz, 1H), 7.14-7.10 (m, 2H), 7.07 (d,  $J = 2.0$  Hz, 1H), 6.99 (d,  $J = 7.2$  Hz, 1H), 5.11 (br s, 2H), 4.14 (d,  $J = 5.2$  Hz, 2H), 4.13-4.07 (m, 4H), 3.47-3.39 (m, 2H), 2.96-2.89 (m, 2H), 2.68-2.61 (m, 2H), 2.33-2.23 (m, 4H), 1.84-1.80 (m, 2H), 1.21-1.19 (m,

12H).  $^{13}\text{C}\{^1\text{H}\}$  NMR (150 MHz,  $\text{CDCl}_3$ ):  $\delta$  166.9, 166.8, 142.8, 142.3, 135.4, 131.94, 131.85, 131.7, 131.1, 128.8, 128.1, 127.6, 125.9, 124.1, 65.9, 65.7, 65.5, 65.4, 64.9, 64.8, 55.8, 55.6, 49.23, 49.17, 38.3, 37.9, 37.8, 37.7, 25.2, 25.1, 21.2, 20.8. HRMS (ESI)  $m/z$ :  $[\text{M}+\text{H}]^+$  Calcd for  $\text{C}_{16}\text{H}_{20}\text{ClN}_2\text{O}_2$  307.1208; Found 307.1205.

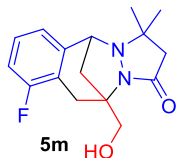

**9-Fluoro-11-(hydroxymethyl)-3,3-dimethyl-2,3,10,11-tetrahydro-1H,5H-5,11-methanobenzo[d]pyrazolo[1,2-a][1,2]diazepin-1-one (5m)**

Eluent: petroleum ether/ethyl acetate (1:1). Yellowish solid (31.8 mg, 55%), mp 178.4-179.5 °C.  $^1\text{H}$  NMR (600 MHz,  $\text{CDCl}_3$ ):  $\delta$  7.15 (td,  $J_1 = 7.8$  Hz,  $J_2 = 5.4$  Hz, 1H), 6.96-6.93 (m, 1H), 6.88 (d,  $J = 7.2$  Hz, 1H), 5.09 (dd,  $J_1 = 9.6$  Hz,  $J_2 = 5.4$  Hz, 1H), 4.16 (dd,  $J_1 = 4.8$  Hz,  $J_2 = 1.2$  Hz, 1H), 4.14-4.07 (m, 2H), 3.41 (d,  $J = 18.0$  Hz, 1H), 2.91 (d,  $J = 18.6$  Hz, 1H), 2.65 (d,  $J = 15.0$  Hz, 1H), 2.31 (d,  $J = 15.0$  Hz, 1H), 2.29-2.26 (m, 1H), 1.83 (d,  $J = 10.8$  Hz, 1H), 1.22 (s, 3H) 1.19 (s, 3H).  $^{13}\text{C}\{^1\text{H}\}$  NMR (150 MHz,  $\text{CDCl}_3$ ):  $\delta$  166.9, 161.5 (d,  $^1J_{\text{C-F}} = 246.2$  Hz), 143.1 (d,  $^3J_{\text{C-F}} = 4.4$  Hz), 127.9 (d,  $^3J_{\text{C-F}} = 7.7$  Hz), 121.2 (d,  $^4J_{\text{C-F}} = 3.2$  Hz), 120.8 (d,  $^2J_{\text{C-F}} = 16.5$  Hz), 114.8 (d,  $^2J_{\text{C-F}} = 20.9$  Hz), 65.5, 65.3, 64.8, 55.4 (d,  $^4J_{\text{C-F}} = 2.1$  Hz), 49.3, 38.2, 32.9, 25.1, 21.0.  $^{19}\text{F}$  NMR (565 MHz,  $\text{CDCl}_3$ ):  $\delta$  -115.65 – -115.68 (m). HRMS (ESI)  $m/z$ :  $[\text{M}+\text{H}]^+$  Calcd for  $\text{C}_{16}\text{H}_{20}\text{FN}_2\text{O}_2$  291.1503; Found 291.1499.

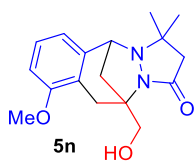

**11-(Hydroxymethyl)-9-methoxy-3,3-dimethyl-2,3,10,11-tetrahydro-1H,5H-5,11-methanobenzo[d]pyrazolo[1,2-a][1,2]diazepin-1-one (5n)**

Eluent: petroleum ether/ethyl acetate (1:1). White solid (38.1 mg, 63%), mp 192.5-193.7 °C.  $^1\text{H}$  NMR (600 MHz,  $\text{CDCl}_3$ ):  $\delta$  7.15 (t,  $J = 8.4$  Hz, 1H), 6.77 (d,  $J = 8.4$  Hz, 1H), 6.70 (d,  $J = 7.2$  Hz, 1H), 5.12 (dd,  $J_1 = 9.6$  Hz,  $J_2 = 4.8$  Hz, 1H), 4.13-4.10 (m, 2H), 4.06 (dd,  $J_1 = 12.6$  Hz,  $J_2 = 4.8$  Hz, 1H), 3.79 (s, 3H), 3.31 (d,  $J =$

18.6 Hz, 1H), 2.81 (d,  $J = 18.6$  Hz, 1H), 2.63 (d,  $J = 15.0$  Hz, 1H), 2.29 (d,  $J = 15.6$  Hz, 1H), 2.25 (dd,  $J_1 = 10.8$  Hz,  $J_2 = 4.8$  Hz, 1H), 1.82 (d,  $J = 11.4$  Hz, 1H), 1.21 (s, 3H) 1.18 (s, 3H).  $^{13}\text{C}\{^1\text{H}\}$  NMR (150 MHz,  $\text{CDCl}_3$ ):  $\delta$  166.8, 158.0, 141.9, 127.3, 121.8, 117.9, 109.6, 65.71, 65.65, 64.7, 55.7, 55.2, 49.3, 38.2, 34.1, 25.0, 21.1. HRMS (ESI)  $m/z$ :  $[\text{M}+\text{H}]^+$  Calcd for  $\text{C}_{17}\text{H}_{23}\text{N}_2\text{O}_3$  303.1703; Found 303.1695.

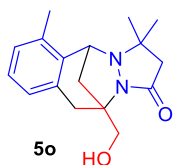

**11-(Hydroxymethyl)-3,3,6-trimethyl-2,3,10,11-tetrahydro-1H,5H-5,11-methanobenzo[d]pyrazolo[1,2-a][1,2]diazepin-1-one (5o)**

Eluent: petroleum ether/ethyl acetate (1:1). White solid (37.1 mg, 65%), mp 188.7-189.9 °C.  $^1\text{H}$  NMR (600 MHz,  $\text{CDCl}_3$ ):  $\delta$  7.11 (t,  $J = 7.2$  Hz, 1H), 7.02 (d,  $J = 7.2$  Hz, 1H), 6.99 (d,  $J = 7.8$  Hz, 1H), 5.19 (t,  $J = 7.2$  Hz, 1H), 4.45 (d,  $J = 5.4$  Hz, 1H), 4.08 (d,  $J = 6.6$  Hz, 2H), 3.43 (d,  $J = 17.4$  Hz, 1H), 3.00 (d,  $J = 18.0$  Hz, 1H), 2.67 (d,  $J = 15.0$  Hz, 1H), 2.38 (s, 3H), 2.29 (d,  $J = 15.0$  Hz, 1H), 2.23 (dd,  $J_1 = 10.8$  Hz,  $J_2 = 4.8$  Hz, 1H), 1.81 (d,  $J = 10.8$  Hz, 1H), 1.23 (s, 3H) 1.22 (s, 3H).  $^{13}\text{C}\{^1\text{H}\}$  NMR (150 MHz,  $\text{CDCl}_3$ ):  $\delta$  167.0, 139.0, 133.4, 132.7, 128.1, 127.6, 66.0, 65.5, 64.9, 51.0, 49.3, 38.8, 38.1, 25.2, 20.8, 19.1. HRMS (ESI)  $m/z$ :  $[\text{M}+\text{Na}]^+$  Calcd for  $\text{C}_{17}\text{H}_{22}\text{N}_2\text{NaO}_2$  309.1573; Found 309.1570.

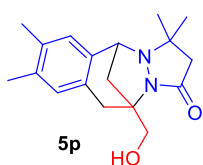

**11-(Hydroxymethyl)-3,3,7,8-tetramethyl-2,3,10,11-tetrahydro-1H,5H-5,11-methanobenzo[d]pyrazolo[1,2-a][1,2]diazepin-1-one (5p)**

Eluent: petroleum ether/ethyl acetate (1:1). Yellowish solid (32.6 mg, 54%), mp 157.6-158.5 °C.  $^1\text{H}$  NMR (400 MHz,  $\text{CDCl}_3$ ):  $\delta$  6.88 (s, 1H), 6.76 (s, 1H), 5.12 (t,  $J = 8.0$  Hz, 1H), 3.98-3.96 (m, 3H), 3.35 (d,  $J = 17.6$  Hz, 1H), 2.84 (d,  $J = 17.6$  Hz, 1H), 2.53 (d,  $J = 15.6$  Hz, 1H), 2.22 (d,  $J = 15.2$  Hz, 1H), 2.18-2.15 (m, 4H), 2.13 (s, 3H), 1.76 (d,  $J = 10.8$  Hz, 1H), 1.14 (s, 3H) 1.10 (s, 3H).  $^{13}\text{C}\{^1\text{H}\}$  NMR (100 MHz,  $\text{CDCl}_3$ ):  $\delta$  167.0,



137.9, 136.5, 134.4, 130.9, 130.4, 127.2, 66.2, 65.9, 64.6, 55.6, 49.4, 38.9, 37.8, 24.9, 21.5, 19.5, 19.3. HRMS

(ESI)  $m/z$ :  $[M+H]^+$  Calcd for  $C_{18}H_{25}N_2O_2$  301.1911; Found 301.1902.

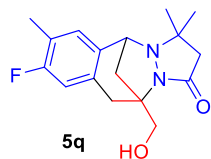

**8-Fluoro-11-(hydroxymethyl)-3,3,7-trimethyl-2,3,10,11-tetrahydro-1H,5H-5,11-methanobenzo[d]pyrazolo[1,2-a][1,2]diazepin-1-one (5q)**

Eluent: petroleum ether/ethyl acetate (1:1). Yellowish solid (37.0 mg, 61%), mp 181.7-182.3 °C.  $^1H$  NMR (600 MHz,  $CDCl_3$ ):  $\delta$  6.88 (d,  $J = 7.8$  Hz, 1H), 6.82 (d,  $J = 10.2$  Hz, 1H), 5.16 (dd,  $J_1 = 9.6$  Hz,  $J_2 = 5.4$  Hz, 1H), 4.08-4.02 (m, 3H), 3.44 (d,  $J = 18.0$  Hz, 1H), 2.93 (d,  $J = 18.0$  Hz, 1H), 2.62 (d,  $J = 15.0$  Hz, 1H), 2.31 (d,  $J = 15.0$  Hz, 1H), 2.26-2.23 (m, 4H), 1.82 (d,  $J = 10.8$  Hz, 1H), 1.21 (s, 3H) 1.17 (s, 3H).  $^{13}C\{^1H\}$  NMR (150 MHz,  $CDCl_3$ ):  $\delta$  167.0, 160.9 (d,  $^1J_{C-F} = 243.9$  Hz), 136.1 (d,  $^4J_{C-F} = 3.3$  Hz), 132.7 (d,  $^3J_{C-F} = 7.7$  Hz), 128.8 (d,  $^3J_{C-F} = 5.4$  Hz), 122.6 (d,  $^2J_{C-F} = 17.6$  Hz), 116.0 (d,  $^2J_{C-F} = 23.0$  Hz), 65.8, 65.7, 64.6, 55.3, 49.3, 38.7, 38.1, 25.0, 21.4, 14.2 (d,  $^4J_{C-F} = 3.3$  Hz).  $^{19}F$  NMR (565 MHz,  $CDCl_3$ ):  $\delta$  -118.39 – -118.42 (m). HRMS (ESI)  $m/z$ :  $[M+Na]^+$  Calcd for  $C_{17}H_{21}FN_2NaO_2$  327.1479; Found 327.1471.

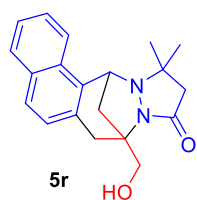

**8-(Hydroxymethyl)-12,12-dimethyl-7,11,12,14-tetrahydro-8H,10H-8,14-methanonaphtho[1,2-d]pyrazolo[1,2-a][1,2]diazepin-10-one (5r)**

Eluent: petroleum ether/ethyl acetate (1:1). Yellowish solid (36.6 mg, 57%), mp 221.3-224.0 °C.  $^1H$  NMR (600 MHz,  $CDCl_3$ ):  $\delta$  8.03 (d,  $J = 8.4$  Hz, 1H), 7.84 (d,  $J = 7.8$  Hz, 1H), 7.74 (d,  $J = 8.4$  Hz, 1H), 7.56 (t,  $J = 7.2$  Hz, 1H), 7.47 (t,  $J = 7.8$  Hz, 1H), 7.29 (d,  $J = 8.4$  Hz, 1H), 5.30 (br s, 1H), 5.07 (d,  $J = 5.4$  Hz, 1H), 4.17-4.13 (m, 2H), 3.62 (d,  $J = 17.4$  Hz, 1H), 3.18 (d,  $J = 18.0$  Hz, 1H), 2.59 (d,  $J = 15.0$  Hz, 1H), 2.41 (dd,  $J_1$

= 10.8 Hz,  $J_2 = 4.8$  Hz, 1H), 2.38 (d,  $J = 15.6$  Hz, 1H), 1.96 (d,  $J = 10.8$  Hz, 1H), 1.32 (s, 3H) 1.08 (s, 3H).  $^{13}\text{C}\{^1\text{H}\}$  NMR (150 MHz,  $\text{CDCl}_3$ ):  $\delta$  166.8, 135.2, 132.4, 131.4, 129.6, 129.0, 128.1, 127.5, 126.7, 125.3, 121.4, 65.8, 64.8, 49.64, 49.55, 39.6, 38.7, 24.7, 21.5. HRMS (ESI)  $m/z$ :  $[\text{M}+\text{H}]^+$  Calcd for  $\text{C}_{20}\text{H}_{23}\text{N}_2\text{O}_2$  323.1754; Found 323.1745.

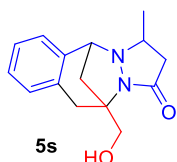

**11-(Hydroxymethyl)-3-methyl-2,3,10,11-tetrahydro-1H,5H-5,11-methanobenzo[d]pyrazolo[1,2-a][1,2]diazepin-1-one (5s)**

Eluent: petroleum ether/ethyl acetate (1:1). White solid (47.1 mg, 91%), mp 199.4-200.2 °C.  $^1\text{H}$  NMR (600 MHz,  $\text{CDCl}_3$ ):  $\delta$  7.25-7.22 (m, 1H), 7.18-7.15 (m, 2H), 7.09 (d,  $J = 7.2$  Hz, 1H), 4.85 (br s, 1H), 4.09 (s, 2H), 4.01 (d,  $J = 5.4$  Hz, 1H), 3.42 (d,  $J = 17.4$  Hz, 1H), 3.30-3.26 (m, 1H), 2.98 (d,  $J = 18.0$  Hz, 1H), 2.55 (dd,  $J_1 = 15.6$  Hz,  $J_2 = 12.6$  Hz, 1H), 2.45 (dd,  $J_1 = 15.6$  Hz,  $J_2 = 6.6$  Hz, 1H), 2.17 (dd,  $J_1 = 10.8$  Hz,  $J_2 = 4.8$  Hz, 1H), 1.88 (d,  $J = 11.4$  Hz, 1H) 1.33 (d,  $J = 6.0$  Hz, 3H).  $^{13}\text{C}\{^1\text{H}\}$  NMR (150 MHz,  $\text{CDCl}_3$ ):  $\delta$  170.9, 140.1, 133.0, 129.7, 128.3, 126.4, 125.7, 68.8, 65.7, 62.5, 59.9, 42.1, 38.3, 35.9, 17.8. HRMS (ESI)  $m/z$ :  $[\text{M}+\text{H}]^+$  Calcd for  $\text{C}_{15}\text{H}_{19}\text{N}_2\text{O}_2$  259.1441; Found 259.1436.

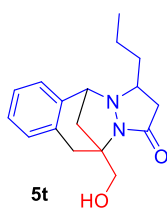

**11-(Hydroxymethyl)-3-propyl-2,3,10,11-tetrahydro-1H,5H-5,11-methanobenzo[d]pyrazolo[1,2-a][1,2]diazepin-1-one (5t)**

Eluent: petroleum ether/ethyl acetate (1:1). White solid (40.8 mg, 71%), mp 176.9-177.4 °C.  $^1\text{H}$  NMR (600 MHz,  $\text{CDCl}_3$ ):  $\delta$  7.23 (t,  $J = 7.2$  Hz, 1H), 7.18-7.15 (m, 2H), 7.09 (d,  $J = 7.2$  Hz, 1H), 4.84 (t,  $J = 7.8$  Hz, 1H), 4.09 (d,  $J = 7.2$  Hz, 2H), 4.03 (d,  $J = 4.8$  Hz, 1H), 3.42 (d,  $J = 18.0$  Hz, 1H), 3.22-3.16 (m, 1H), 2.98 (d,  $J = 18.0$  Hz, 1H), 2.56-2.46 (m, 2H), 2.16 (dd,  $J_1 = 10.8$  Hz,  $J_2 = 5.4$  Hz, 1H), 1.87 (d,  $J = 11.4$  Hz, 1H), 1.75-1.70

(m, 1H), 1.64-1.57 (m, 1H), 1.42-1.35 (m, 2H), 0.98 (t,  $J = 7.2$  Hz, 3H).  $^{13}\text{C}\{^1\text{H}\}$  NMR (150 MHz,  $\text{CDCl}_3$ ):  $\delta$  170.7, 140.3, 133.0, 129.7, 128.2, 126.4, 125.5, 68.4, 67.1, 65.7, 60.3, 40.6, 38.3, 35.9, 35.5, 19.7, 14.3. HRMS (ESI)  $m/z$ :  $[\text{M}+\text{H}]^+$  Calcd for  $\text{C}_{17}\text{H}_{23}\text{N}_2\text{O}_2$  287.1754; Found 287.1751.

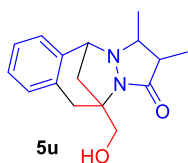

### 11-(Hydroxymethyl)-2,3-dimethyl-2,3,10,11-tetrahydro-1H,5H-5,11-methanobenzo[d]pyrazolo[1,2-a][1,2]diazepin-1-one (5u)

Eluent: petroleum ether/ethyl acetate (1:1). White solid (32.0 mg, 59%), mp 184.9-185.9 °C.  $^1\text{H}$  NMR (600 MHz,  $\text{CDCl}_3$ ):  $\delta$  7.25-7.22 (m, 1H), 7.18-7.15 (m, 2H), 7.09 (d,  $J = 7.8$  Hz, 1H), 4.83 (dd,  $J_1 = 10.2$  Hz,  $J_2 = 5.4$  Hz, 1H), 4.12 (dd,  $J_1 = 13.2$  Hz,  $J_2 = 10.8$  Hz, 1H), 4.04 (dd,  $J_1 = 12.6$  Hz,  $J_2 = 5.4$  Hz, 1H), 4.00 (d,  $J = 4.8$  Hz, 1H), 3.42 (d,  $J = 17.4$  Hz, 1H), 2.99 (d,  $J = 18.0$  Hz, 1H), 2.79-2.75 (m, 1H), 2.52-2.49 (m, 1H), 2.14 (dd,  $J_1 = 11.4$  Hz,  $J_2 = 4.8$  Hz, 1H), 1.86 (d,  $J = 11.4$  Hz, 1H), 1.32 (d,  $J = 6.6$  Hz, 3H), 1.12 (d,  $J = 7.2$  Hz, 3H).  $^{13}\text{C}\{^1\text{H}\}$  NMR (150 MHz,  $\text{CDCl}_3$ ):  $\delta$  173.3, 140.3, 133.1, 129.7, 128.3, 126.4, 125.6, 69.4, 68.5, 65.7, 59.7, 46.1, 38.3, 35.6, 16.7, 11.3. HRMS (ESI)  $m/z$ :  $[\text{M}+\text{H}]^+$  Calcd for  $\text{C}_{16}\text{H}_{21}\text{N}_2\text{O}_2$  273.1598; Found 273.1593.

## 4. Structural elaborations of 5a

### 4.1. Synthesis of 6

To a reaction tube equipped with a stir bar were charged with **5a** (0.2 mmol, 54.4 mg) and toluene (10 mL). The resulting solution was then added with iodine (0.4 mmol, 103 mg), triphenylphosphine (0.6 mmol, 157 mg) and imidazole (0.6 mmol, 40 mg) under argon. The resulting mixture was stirred at 110 °C for 6 h. Upon completion, it was cooled to room temperature, and then concentrated under reduced pressure. The residual was purified by silica gel chromatography using petroleum ether/ethyl acetate (1:1) as eluent to afford **6**.

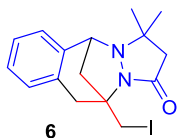

**11-(Iodomethyl)-3,3-dimethyl-2,3,10,11-tetrahydro-1H,5H-5,11-methanobenzo[d]pyrazolo[1,2-a][1,2]diazepin-1-one (6)**

Eluent: petroleum ether/ethyl acetate (1:1). Yellowish solid (52.1 mg, 68%), mp 145.7-146.6 °C. <sup>1</sup>H NMR (400 MHz, CDCl<sub>3</sub>): δ 7.27-7.22 (m, 1H), 7.19-7.16 (m, 2H), 7.14 (d, *J* = 7.6 Hz, 1H), 4.20 (d, *J* = 4.0 Hz, 1H), 3.91 (d, *J* = 10.4 Hz, 1H), 3.84 (d, *J* = 10.8 Hz, 1H), 3.69 (d, *J* = 16.8 Hz, 1H), 3.29 (d, *J* = 16.8 Hz, 1H), 2.62-2.58 (m, 1H), 2.23 (d, *J* = 15.6 Hz, 1H), 2.11 (d, *J* = 10.4 Hz, 1H), 1.94 (d, *J* = 15.6 Hz, 1H), 1.29 (s, 3H), 1.06 (s, 3H). <sup>13</sup>C{<sup>1</sup>H} NMR (100 MHz, CDCl<sub>3</sub>): δ 169.8, 136.5, 134.3, 129.4, 128.8, 128.5, 126.3, 62.2, 59.6, 58.4, 48.2, 45.6, 37.9, 27.9, 23.7, 11.1. HRMS (ESI) *m/z*: [M+H]<sup>+</sup> Calcd for C<sub>16</sub>H<sub>20</sub>IN<sub>2</sub>O 383.0615; Found 383.0614.

**4.2. Synthesis of 7**

To a reaction tube equipped with a stir bar were added **5a** (81.7 mg, 0.3 mmol), DMAP (110.0 mg, 0.9 mmol), *p*-TsCl (85.8 mg, 0.45 mmol) and DCM (1.5 mL). The resulting mixture was stirred at room temperature for 3 h. Upon completion, it was filtered through a pad of celite, and concentrated under reduced pressure. The residue was purified by silica gel chromatography using petroleum ether/ethyl acetate (1:1) as eluent to afford **7**.

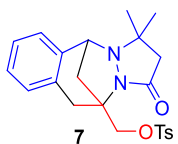

**(3,3-Dimethyl-1-oxo-2,3,5,10-tetrahydro-1H,11H-5,11-methanobenzo[d]pyrazolo[1,2-a][1,2]diazepin-11-yl)methyl 4-methylbenzenesulfonate (7)**

Eluent: petroleum ether/ethyl acetate (1:1). Yellow solid (94.6 mg, 74%), mp 182.8-183.5 °C. <sup>1</sup>H NMR (600 MHz, CDCl<sub>3</sub>): δ 7.83 (d, *J* = 8.4 Hz, 2H), 7.37 (d, *J* = 7.8 Hz, 2H), 7.23-7.20 (m, 1H), 7.17-7.13 (m, 2H), 7.09

(d,  $J = 7.8$  Hz, 1H), 4.62 (d,  $J = 10.2$  Hz, 1H), 4.52 (d,  $J = 10.2$  Hz, 1H), 4.17 (d,  $J = 4.2$  Hz, 1H), 3.42 (d,  $J = 16.8$  Hz, 1H), 3.03 (d,  $J = 16.8$  Hz, 1H), 2.51 (dd,  $J_1 = 11.4$  Hz,  $J_2 = 3.6$  Hz, 1H), 2.46 (s, 3H), 2.13 (d,  $J = 16.2$  Hz, 1H), 2.08-2.04 (m, 2H), 1.20 (s, 3H), 1.12 (s, 3H).  $^{13}\text{C}\{^1\text{H}\}$  NMR (150 MHz,  $\text{CDCl}_3$ ):  $\delta$  170.1, 145.1, 137.4, 133.2, 132.6, 130.0, 129.6, 128.4, 128.11, 128.08, 126.4, 71.1, 62.0, 60.6, 57.4, 48.1, 40.9, 36.4, 26.2, 24.2, 21.7. HRMS (ESI)  $m/z$ :  $[\text{M}+\text{H}]^+$  Calcd for  $\text{C}_{23}\text{H}_{27}\text{N}_2\text{O}_4\text{S}$  427.1686; Found 427.1680.

### 4.3. Synthesis of **8**<sup>[3]</sup>

To a reaction tube equipped with a stir bar were added **5a** (54.4 mg, 0.2 mmol), DCC (41.3 mg, 0.2 mmol), DMAP (4.9 mg, 0.04 mmol), oxaprozin (58.7 mg, 0.2 mmol) and DCM (1 mL). The resulting mixture was stirred at room temperature under air for 24 h. Upon completion, it was filtered through a pad of celite and concentrated under reduced pressure. The residue was purified by silica gel chromatography using petroleum ether/ethyl acetate (1:1) as eluent to afford **8**.

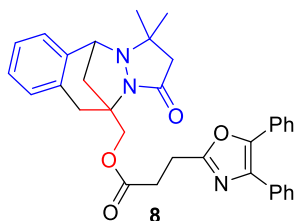

### (3,3-Dimethyl-1-oxo-2,3,5,10-tetrahydro-1H,11H-5,11-methanobenzo[d]pyrazolo[1,2-a][1,2]diazepin-11-yl)methyl 3-(4,5-diphenyloxazol-2-yl)propanoate (**8**)

Eluent: petroleum ether/ethyl acetate (1:1). Colorless oil (71.3 mg, 65%).  $^1\text{H}$  NMR (600 MHz,  $\text{CDCl}_3$ ):  $\delta$  7.58 (d,  $J = 7.2$  Hz, 2H), 7.54 (d,  $J = 7.8$  Hz, 2H), 7.34-7.30 (m, 6H), 7.18 (t,  $J = 7.2$  Hz, 1H), 7.14 (t,  $J = 7.2$  Hz, 1H), 7.09 (d,  $J = 7.8$  Hz, 1H), 7.06 (d,  $J = 7.2$  Hz, 1H), 4.82 (d,  $J = 11.4$  Hz, 1H), 4.71 (d,  $J = 11.4$  Hz, 1H), 4.03 (d,  $J = 4.2$  Hz, 1H), 3.50 (d,  $J = 16.8$  Hz, 1H), 3.25-3.18 (m, 2H), 3.00-2.97 (m, 2H), 2.94 (d,  $J = 16.8$  Hz, 1H), 2.47 (dd,  $J_1 = 10.8$  Hz,  $J_2 = 4.2$  Hz, 1H), 2.17-2.11 (m, 2H), 1.89 (d,  $J = 10.8$  Hz, 1H), 1.21 (s, 3H), 1.13 (s, 3H).  $^{13}\text{C}\{^1\text{H}\}$  NMR (150 MHz,  $\text{CDCl}_3$ ):  $\delta$  171.5, 169.7, 161.7, 145.5, 138.0, 135.1, 133.4, 132.5, 129.7,

129.0, 128.7, 128.6, 128.5, 128.3, 128.1, 127.9, 127.8, 126.5, 126.3, 65.3, 62.5, 60.8, 57.1, 48.4, 40.3, 37.0, 31.0, 25.6, 24.3, 23.5. HRMS (ESI)  $m/z$ :  $[M+H]^+$  Calcd for  $C_{34}H_{34}N_3O_4$  548.2544; Found 548.2539.

#### 4.4. Synthesis of 9

To a reaction tube equipped with a stir bar were added **5a** (54.4 mg, 0.2 mmol), DCC (41.3 mg, 0.2 mmol), DMAP (4.9 mg, 0.04 mmol), adapalene (82.5 mg, 0.2 mmol) and DCM (1 mL). The resulting mixture was stirred at room temperature for 24 h. Upon completion, it was filtered through a pad of celite and concentrated under reduced pressure. The residue was purified by silica gel chromatography using dichloromethane/methanol (20:1) as eluent to afford **9**.

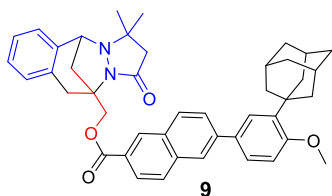

#### (3,3-Dimethyl-1-oxo-2,3,5,10-tetrahydro-1*H*,11*H*-5,11-methanobenzo[*d*]pyrazolo[1,2-*a*][1,2]diazepin-11-yl)methyl 6-(3-((3*r*,5*r*,7*r*)-adamantan-1-yl)-4-methoxyphenyl)-2-naphthoate (**9**)

Eluent: dichloromethane/methanol (20:1). White solid (105.8 mg, 79%), mp 167.9-168.7 °C.  $^1H$  NMR (600 MHz,  $CDCl_3$ ):  $\delta$  8.66 (s, 1H), 8.10 (d,  $J = 8.4$  Hz, 1H), 8.10 (s, 1H), 7.98 (d,  $J = 8.4$  Hz, 1H), 7.91 (d,  $J = 9.0$  Hz, 1H), 7.79 (d,  $J = 8.4$  Hz, 1H), 7.60 (d,  $J = 1.8$  Hz, 1H), 7.53 (dd,  $J_1 = 8.4$  Hz,  $J_2 = 1.8$  Hz, 1H), 7.27-7.24 (m, 1H), 7.20-7.18 (m, 3H), 6.98 (d,  $J = 8.4$  Hz, 1H), 5.02-4.96 (m, 2H), 4.21 (d,  $J = 4.2$  Hz, 1H), 3.89 (s, 3H), 3.74 (d,  $J = 16.8$  Hz, 1H), 3.12 (d,  $J = 16.8$  Hz, 1H), 2.64 (dd,  $J_1 = 10.8$  Hz,  $J_2 = 3.6$  Hz, 1H), 2.22 (d,  $J = 15.6$  Hz, 1H), 2.18 (s, 6H), 2.15-2.10 (m, 5H), 1.80 (s, 6H), 1.29 (s, 3H), 1.20 (s, 3H).  $^{13}C\{^1H\}$  NMR (150 MHz,  $CDCl_3$ ):  $\delta$  170.4, 166.4, 159.0, 141.5, 139.0, 137.7, 136.1, 133.7, 133.0, 132.5, 131.3, 131.2, 129.8, 128.41, 128.35, 128.1, 126.7, 126.5, 126.4, 126.0, 125.8, 125.7, 124.8, 112.2, 65.9, 62.8, 60.2, 57.6, 55.2, 48.2, 40.9, 40.6, 37.23, 37.15, 36.9, 29.1, 26.5, 24.3. HRMS (ESI)  $m/z$ :  $[M+H]^+$  Calcd for  $C_{44}H_{47}N_2O_4$  667.3530; Found 667.3519.

## 5. Gram-Scale Synthesis of **3a** and **5a**

To a reaction tube equipped with a stir bar were charged with **1a** (1.01 g, 5.0 mmol), **2** (0.86 g, 7.5 mmol), [RhCp\*(MeCN)<sub>3</sub>](SbF<sub>6</sub>)<sub>2</sub> (104.0 mg, 0.125 mmol), AgSbF<sub>6</sub> (85.8 mg, 0.25 mmol) and TFE (10 mL). The mixture was stirred at 120 °C for 6 h. Upon completion, it was cooled to room temperature, filtered through a pad of celite, and concentrated under reduced pressure. The residue was purified by silica gel chromatography using petroleum ether/ethyl acetate (1:1) as eluent to afford **3a** (0.91 g, 67%).

To a reaction tube equipped with a stir bar were charged with **1a** (1.01 g, 5.0 mmol), **4** (1.14 g, 10.0 mmol), [Ru(*p*-cymene)Cl<sub>2</sub>]<sub>2</sub> (76.5 mg, 0.125 mmol), AgSbF<sub>6</sub> (171.7 g, 0.5 mmol) and HFIP (10 mL). The mixture was stirred at 80 °C under argon for 6 h. Upon completion, it was cooled to room temperature, filtered through a pad of celite, and concentrated under reduced pressure. The residue was purified by silica gel chromatography using petroleum ether/ethyl acetate (1:1) as eluent to afford **5a** (1.13 g, 83%).

### III. Mechanim studies

#### 1. Studies on the reversibility of C–H bond activation

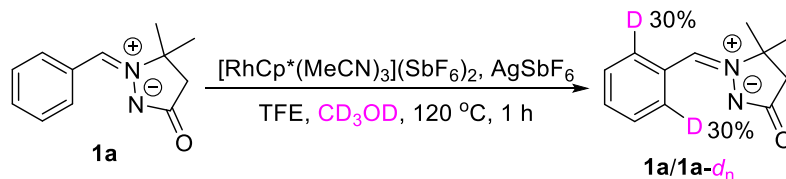

To a reaction tube equipped with a stir bar were charged with **1a** (40.4 mg, 0.2 mmol),  $\text{CD}_3\text{OD}$  (0.16 mL, 4 mmol),  $[\text{RhCp}^*(\text{MeCN})_3](\text{SbF}_6)_2$  (8.3 mg, 0.01 mmol),  $\text{AgSbF}_6$  (6.9 mg, 0.02 mmol) and TFE (2 mL). The resulting mixture was stirred at  $120\text{ }^\circ\text{C}$  under air for 1 h. Afterwards, it was cooled to room temperature and concentrated under reduced pressure. The residue was purified by silica gel chromatography using ethyl acetate as eluent to give a mixture of **1a** and **1a-d<sub>n</sub>**. Upon analyzing the  $^1\text{H}$  NMR spectrum of the mixture, the deuteration ratio was determined to be 30%.

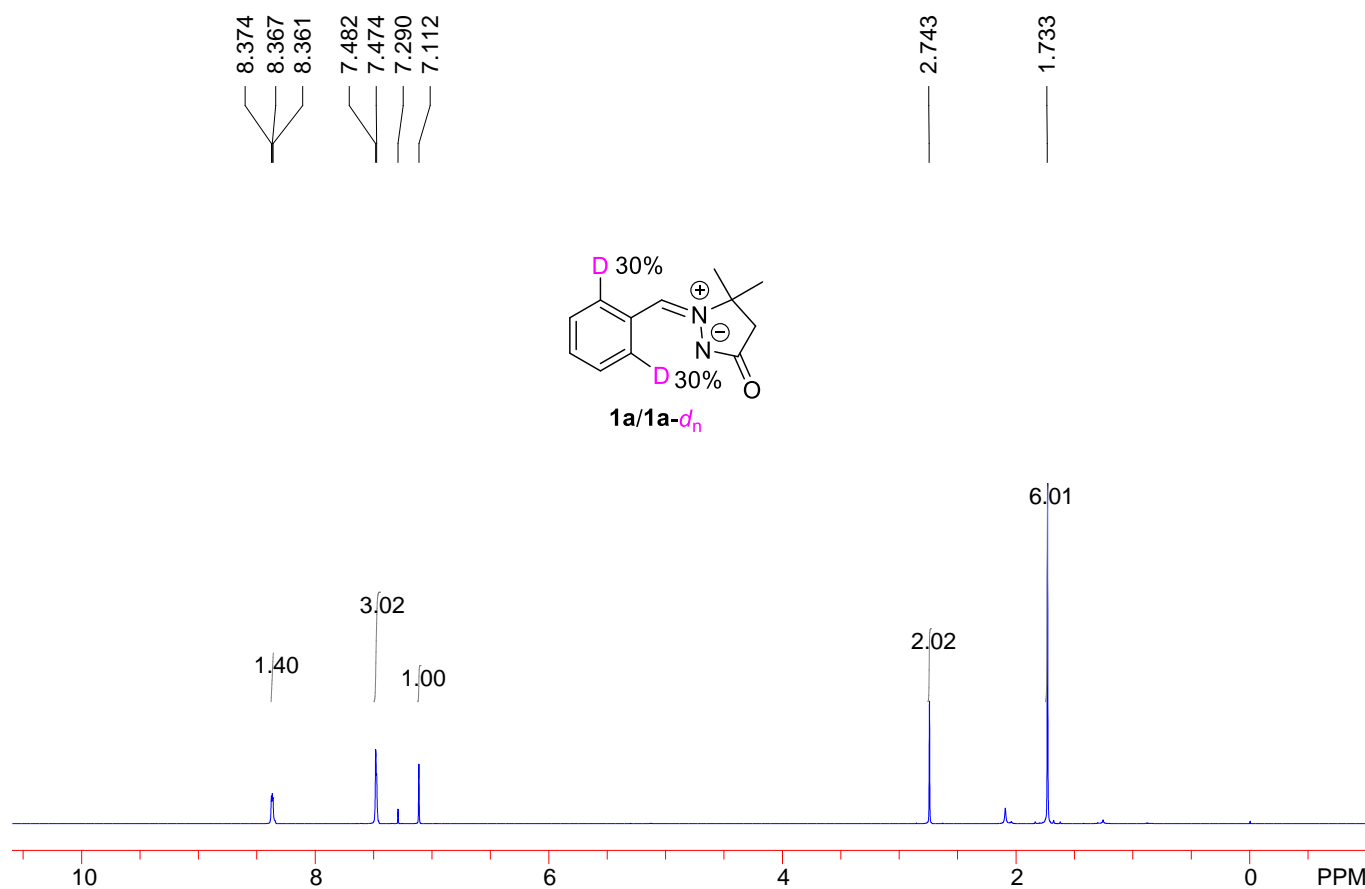



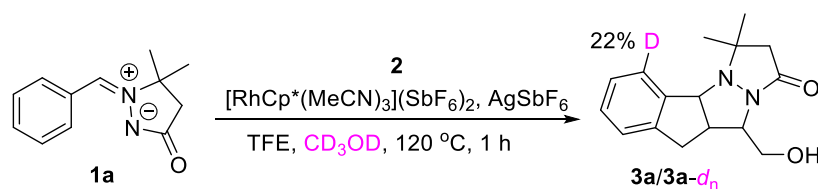

To a reaction tube equipped with a stir bar were charged with **1a** (40.4 mg, 0.2 mmol), **2** (34.2 mg, 0.3 mmol),  $\text{CD}_3\text{OD}$  (0.16 mL, 4 mmol),  $[\text{RhCp}^*(\text{MeCN})_3](\text{SbF}_6)_2$  (8.3 mg, 0.01 mmol),  $\text{AgSbF}_6$  (6.9 mg, 0.02 mmol) and TFE (2 mL). The resulting mixture was stirred at  $120\text{ }^\circ\text{C}$  under air for 1 h. Afterwards, it was cooled to room temperature and concentrated under reduced pressure. The residue was purified by silica gel chromatography using petroleum ether/ethyl acetate (1:1) as eluent to give a mixture of **3a** and **3a-d<sub>n</sub>**. Upon analyzing the  $^1\text{H}$  NMR spectrum of the mixture, the deuteration ratio was determined to be 22%.

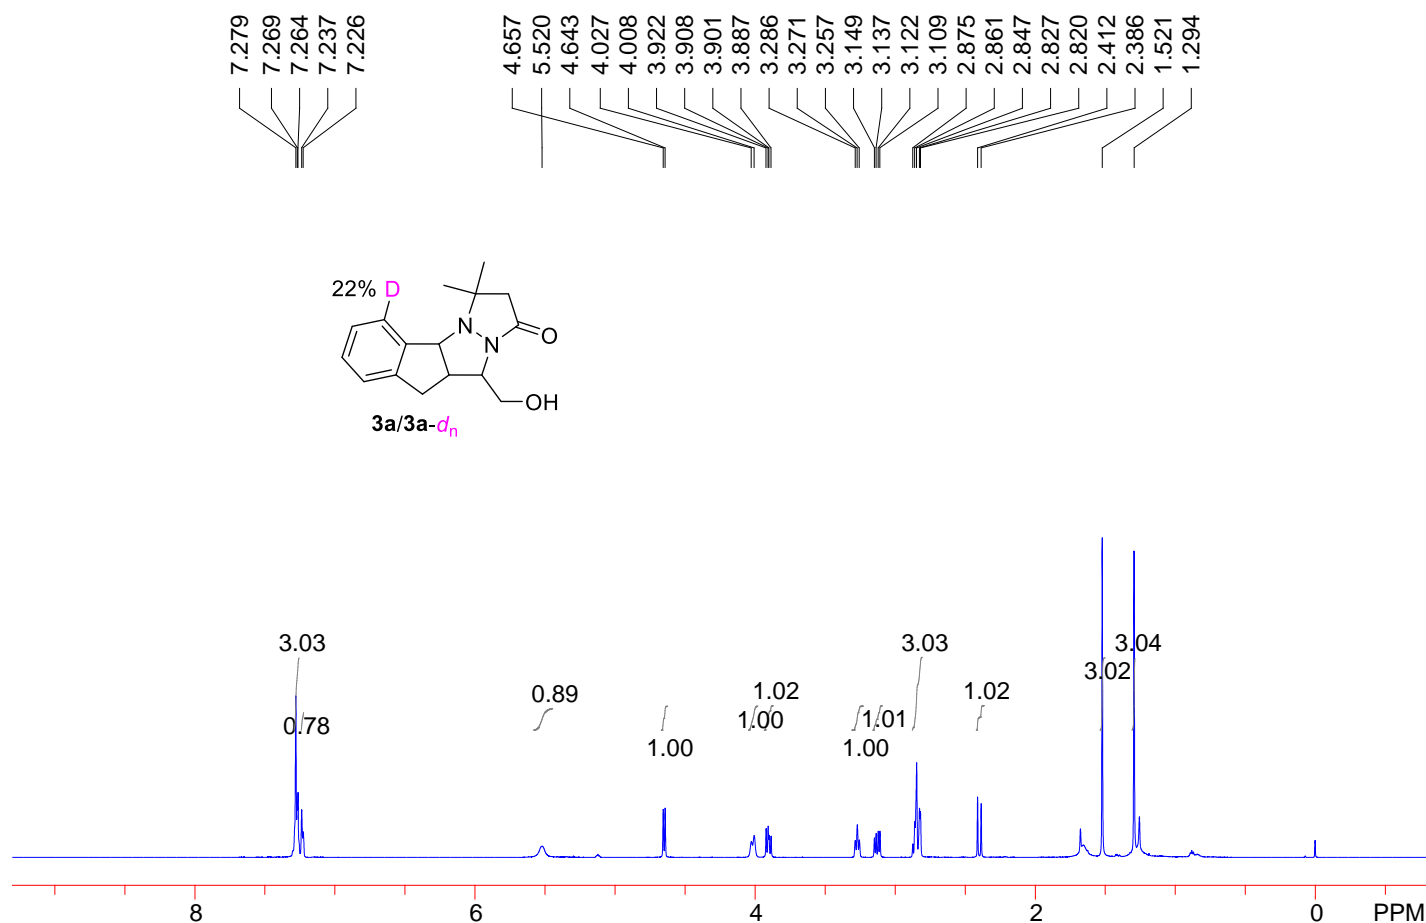

## 2. Kinetic isotope effect study

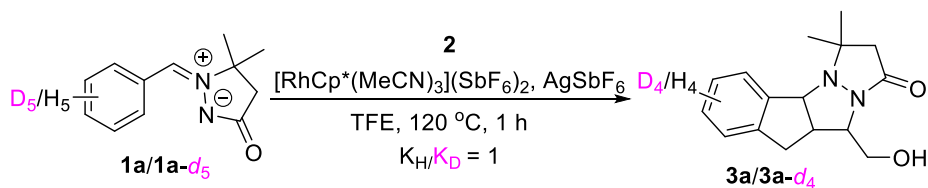

To a reaction tube equipped with a stir bar were added **1a** (40.4 mg, 0.2 mmol), **1a-d<sub>5</sub>** (41.5 mg, 0.2 mmol), TFE (2 mL), **2** (34.2 mg, 0.3 mmol), [RhCp\*(MeCN)<sub>3</sub>](SbF<sub>6</sub>)<sub>2</sub> (8.3 mg, 0.01 mmol) and AgSbF<sub>6</sub> (6.9 mg, 0.02 mmol) with stirring. The resulting mixture was stirred at 120 °C under air for 1 h. Afterwards, it was cooled to room temperature, and concentrated under reduced pressure. The residue was purified by silica gel chromatography using petroleum ether/ethyl acetate (1:1) as eluent to afford a mixture of **3a** and **3a-d<sub>4</sub>**. Upon analyzing the <sup>1</sup>H NMR spectrum of the mixture, the ratio of **3a** to **3a-d<sub>4</sub>** was determined to be 0.5:0.5. Accordingly, the intermolecular KIE (k<sub>H</sub>/k<sub>D</sub>) was calculated to be 1.

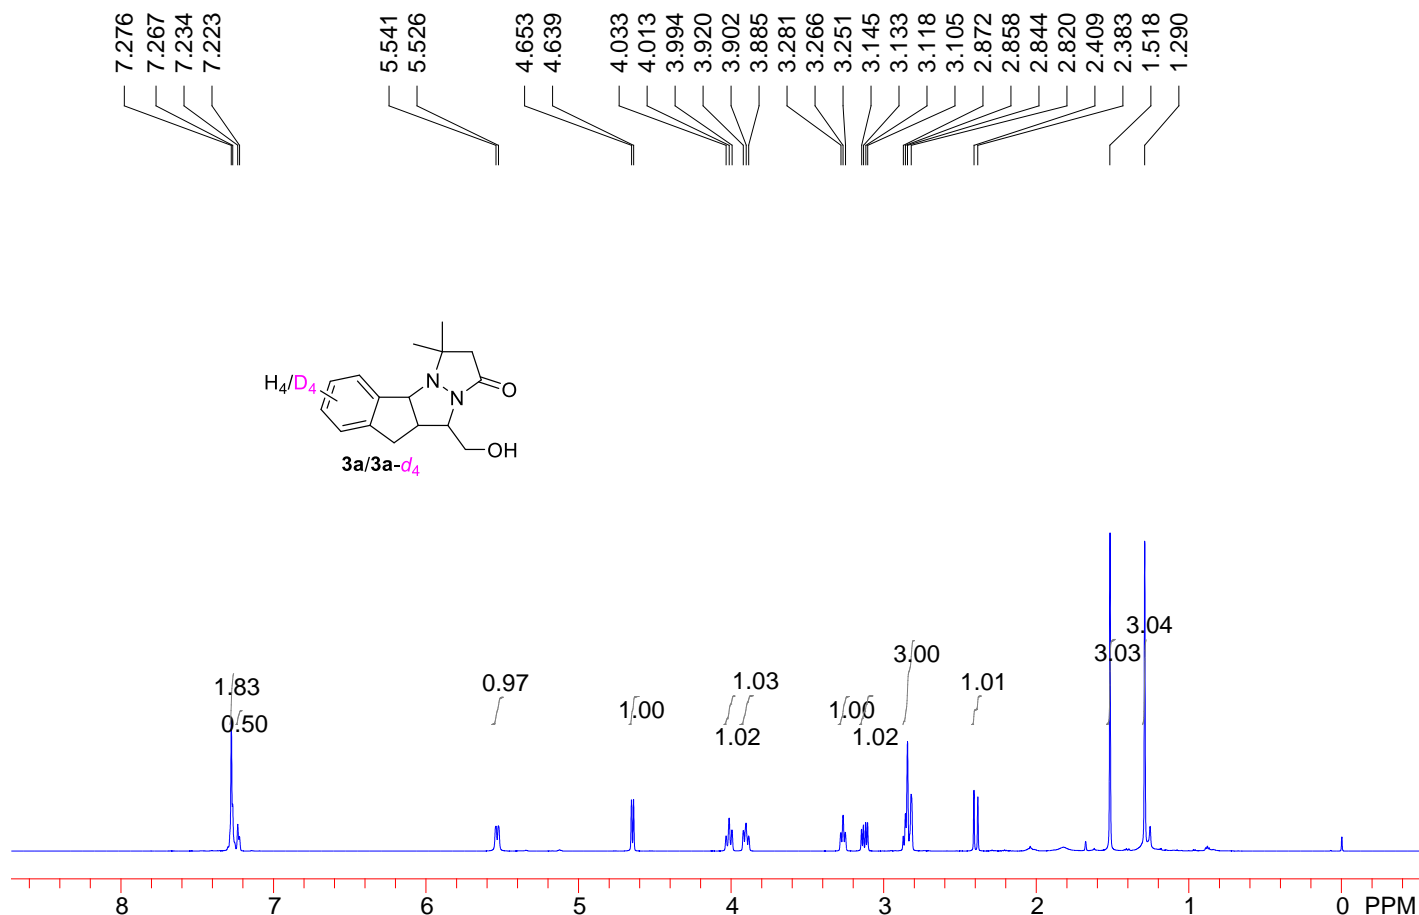

### 3. Competition experiment between **1d** and **1h**

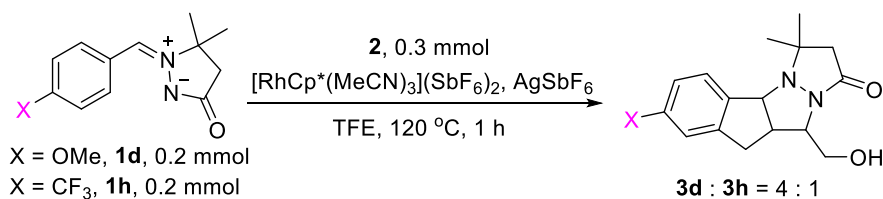

To a reaction tube equipped with a stir bar were added **1d** (46.5 mg, 0.2 mmol), **1h** (44.0 mg, 0.2 mmol), **2** (34.2 mg, 0.3 mmol),  $[\text{RhCp}^*(\text{MeCN})_3](\text{SbF}_6)_2$  (8.3 mg, 0.01 mmol) and  $\text{AgSbF}_6$  (6.9 mg, 0.02 mmol). The tube was then sealed, and the mixture was stirred at 120 °C under air for 1 h. Upon completion, it was cooled to room temperature, filtered through a pad of celite and concentrated under reduced pressure. The residue was purified by silica gel chromatography using petroleum ether/ethyl acetate (1:1) as eluent to afford a mixture of **3d** and **3h**. Upon analyzing the <sup>1</sup>H NMR spectrum of the mixture, the ratio of **3d** to **3h** was determined to be about 4:1.

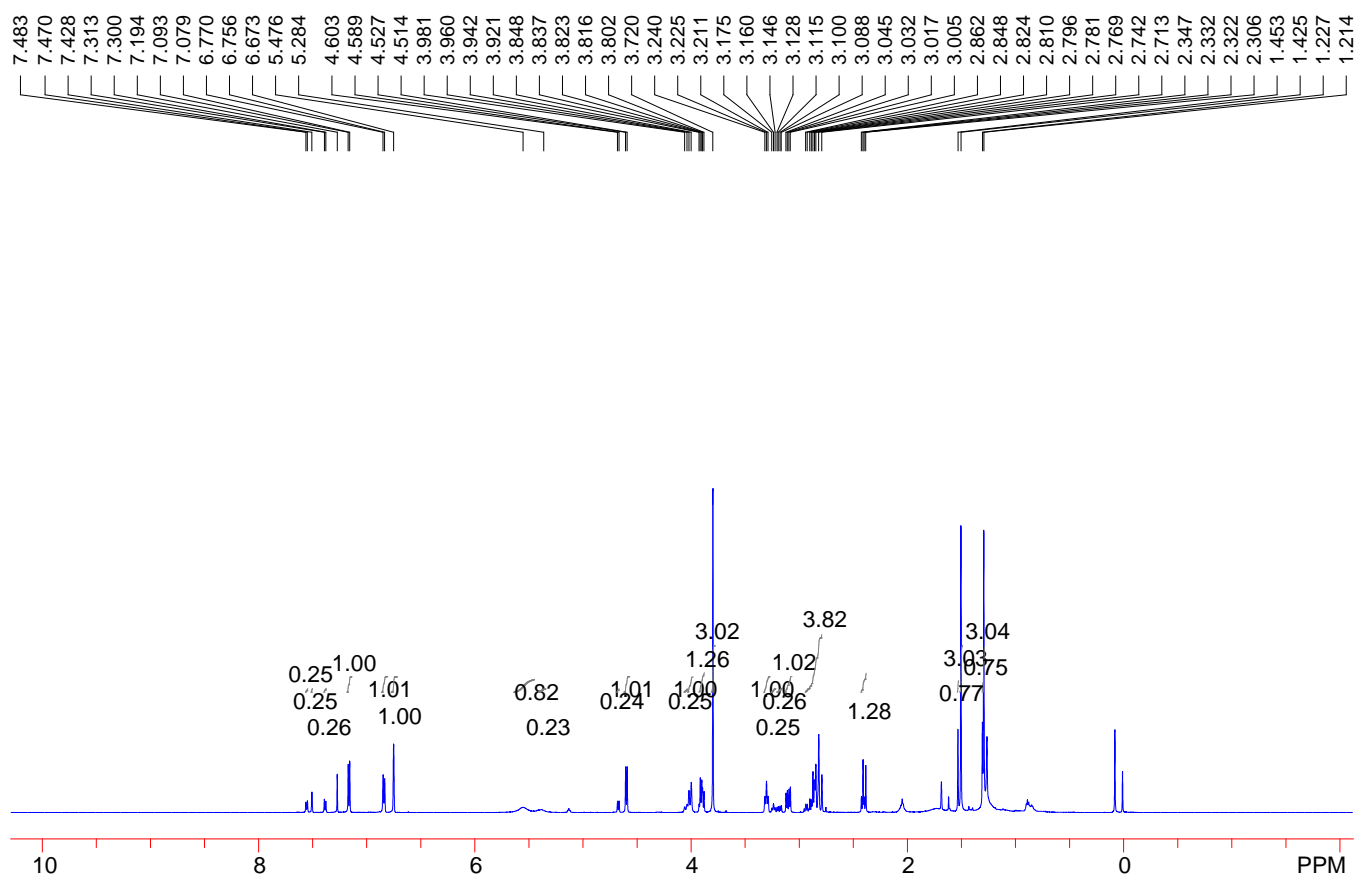

## IV. Copies of NMR spectra of 3a-3v

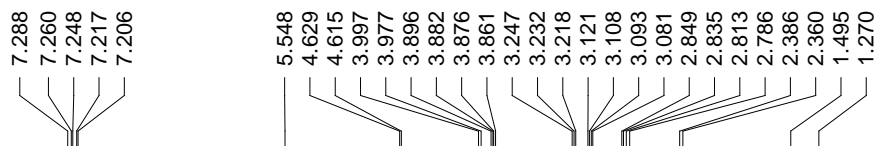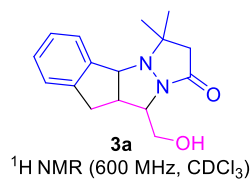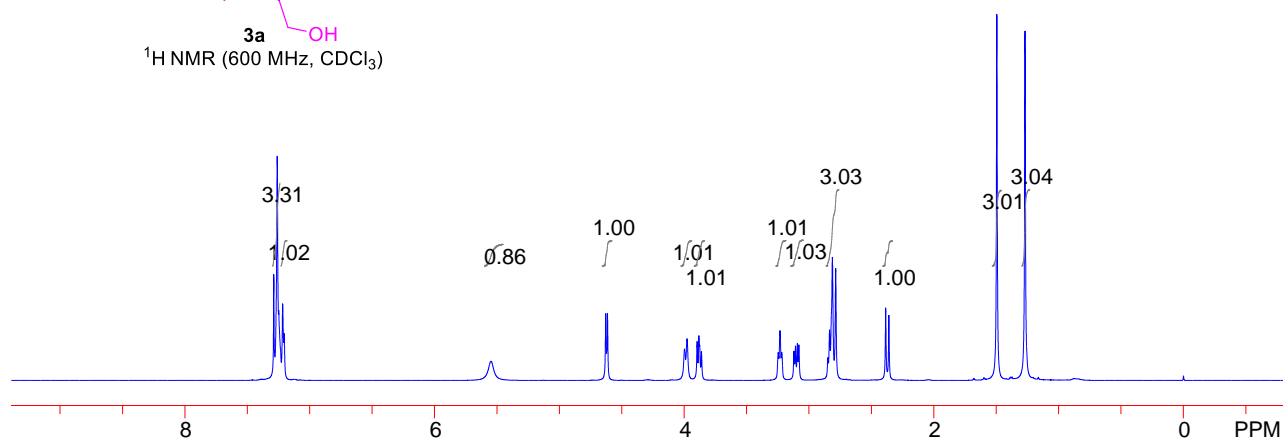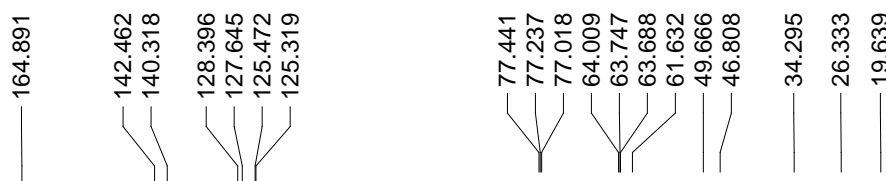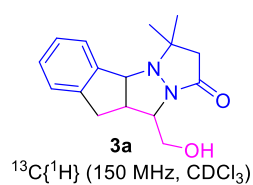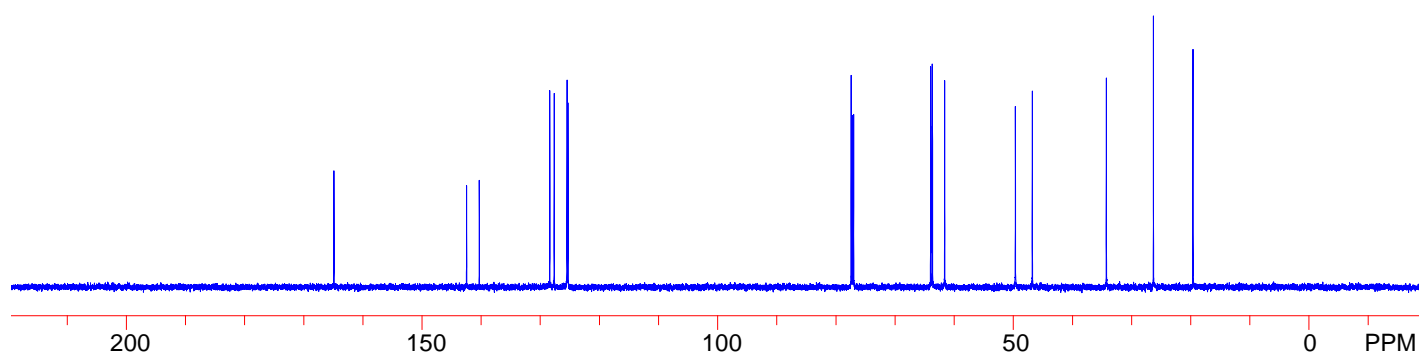

7.270  
7.119  
7.106  
7.083  
7.070  
7.060  
5.561  
5.555  
5.542  
5.536  
4.620  
4.606  
4.030  
4.026  
4.008  
4.005  
3.990  
3.986  
3.919  
3.913  
3.905  
3.899  
3.892  
3.883  
3.878  
3.267  
3.252  
3.237  
3.088  
3.076  
3.061  
3.049  
2.858  
2.850  
2.833  
2.823  
2.809  
2.808  
2.781  
2.754  
2.408  
2.383  
2.360  
1.535  
1.280

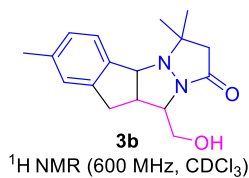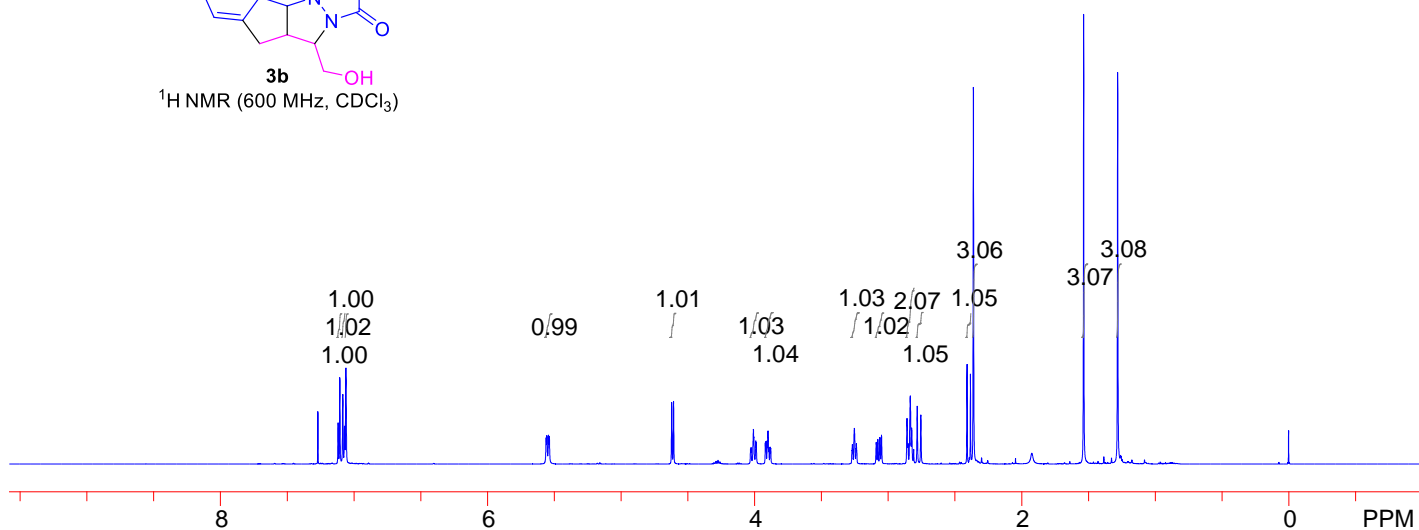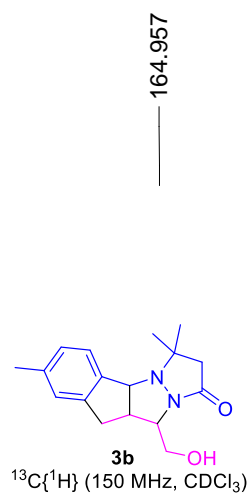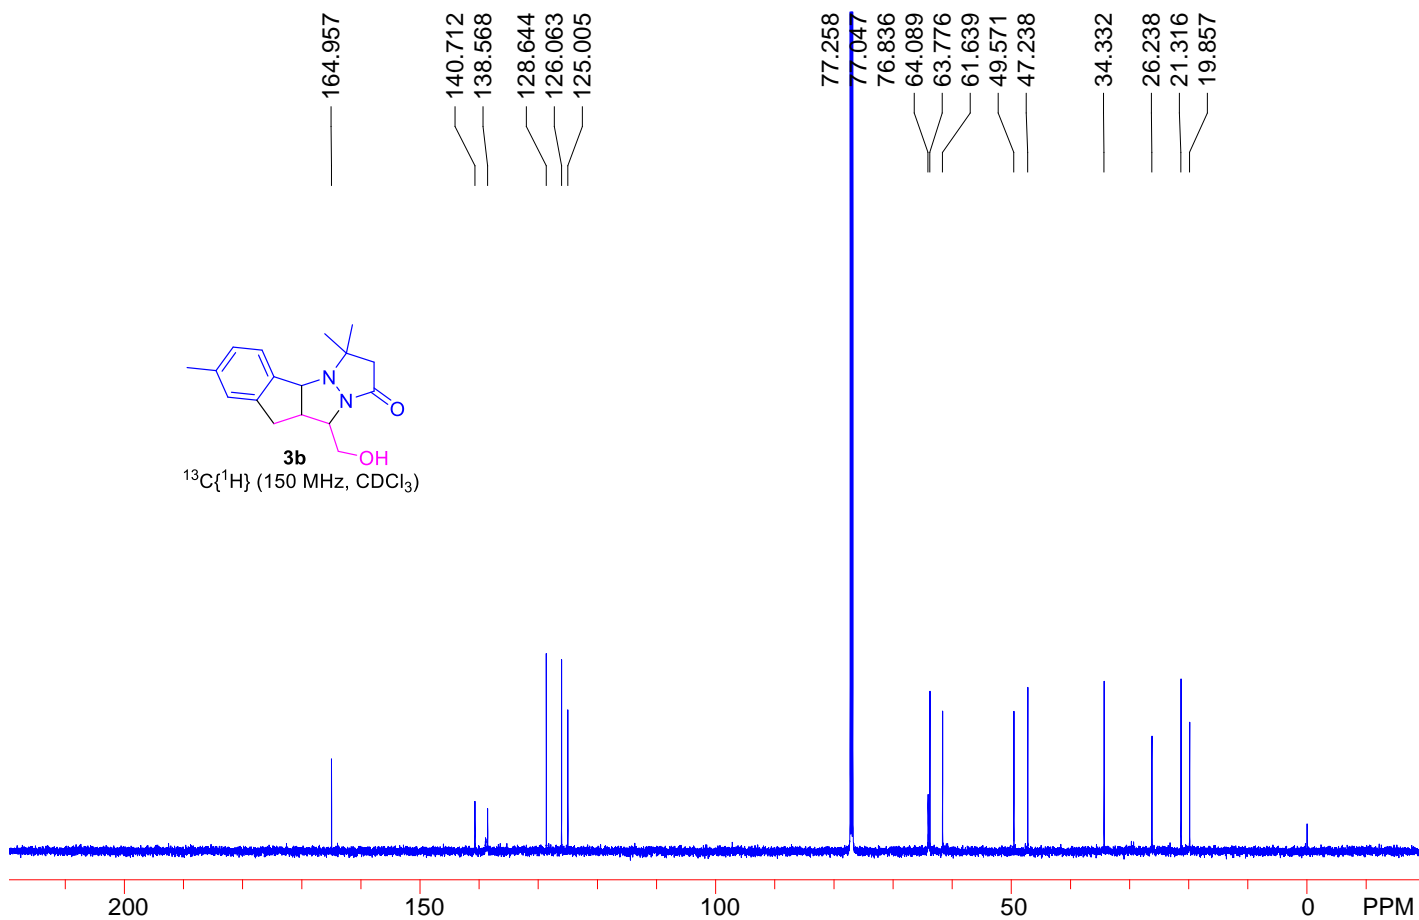

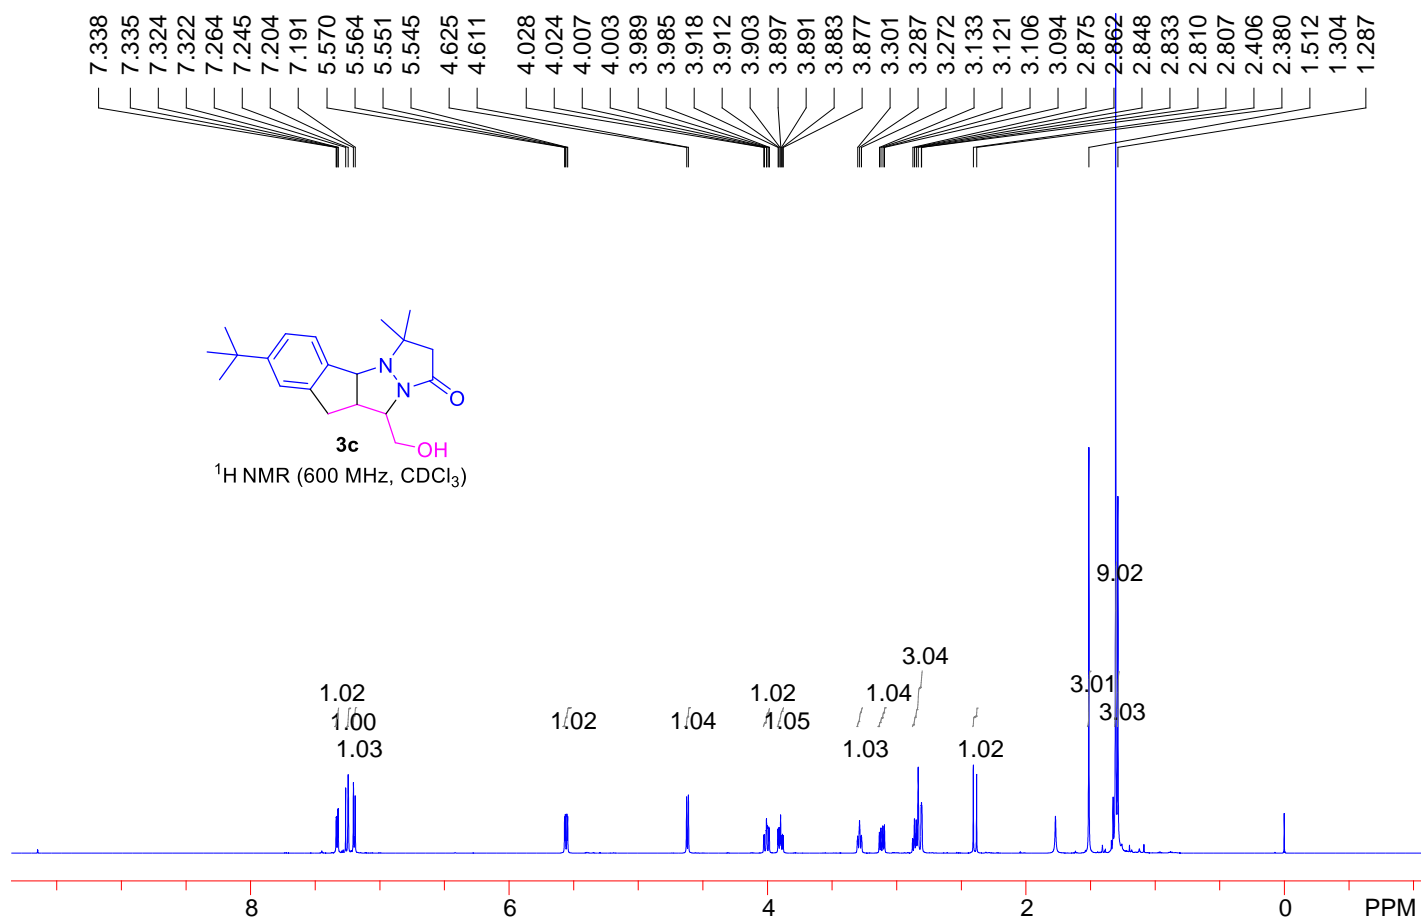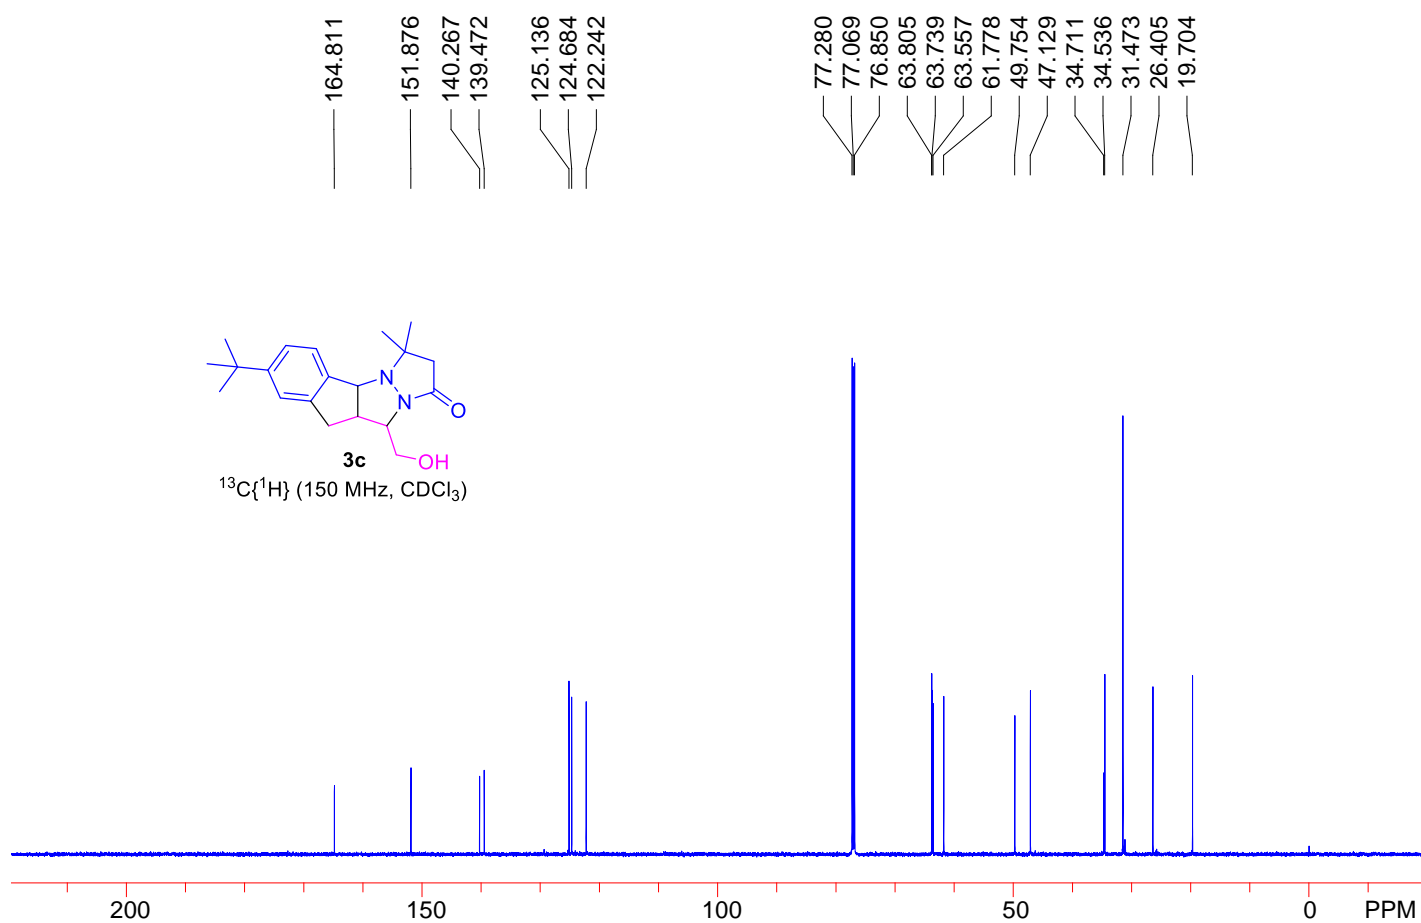

7.270  
7.162  
7.148  
6.842  
6.838  
6.828  
6.824  
6.744  
6.741  
5.571  
4.597  
4.583  
4.012  
4.008  
3.992  
3.988  
3.907  
3.893  
3.886  
3.872  
3.790  
3.309  
3.294  
3.280  
3.114  
3.102  
3.087  
3.074  
2.865  
2.852  
2.837  
2.810  
2.782  
2.402  
2.377  
1.495  
1.283

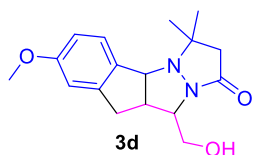

$^1\text{H NMR}$  (600 MHz,  $\text{CDCl}_3$ )

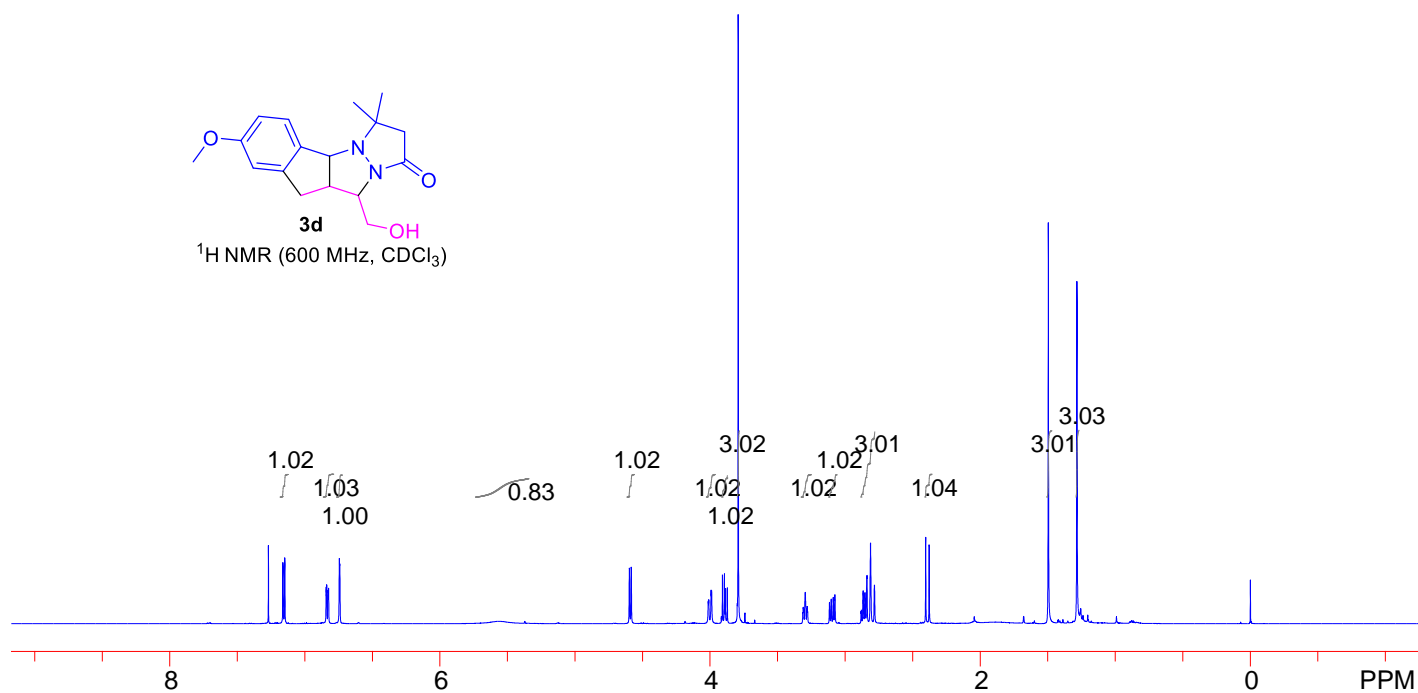

164.906  
160.305  
142.112  
134.419  
125.982  
114.286  
110.108  
77.273  
77.062  
76.850  
63.791  
63.608  
63.484  
61.763  
55.492  
49.717  
47.457  
34.587  
26.354  
19.755

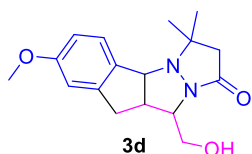

$^{13}\text{C}\{^1\text{H}\}$  (150 MHz,  $\text{CDCl}_3$ )

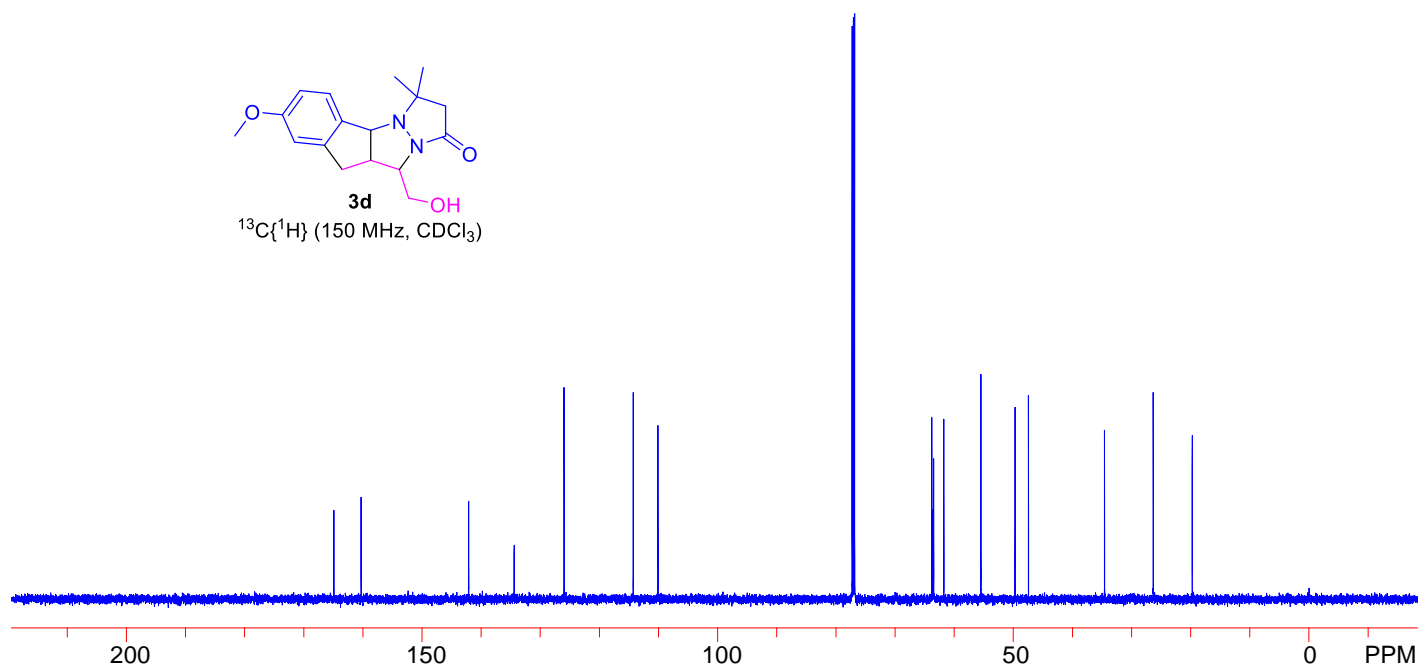

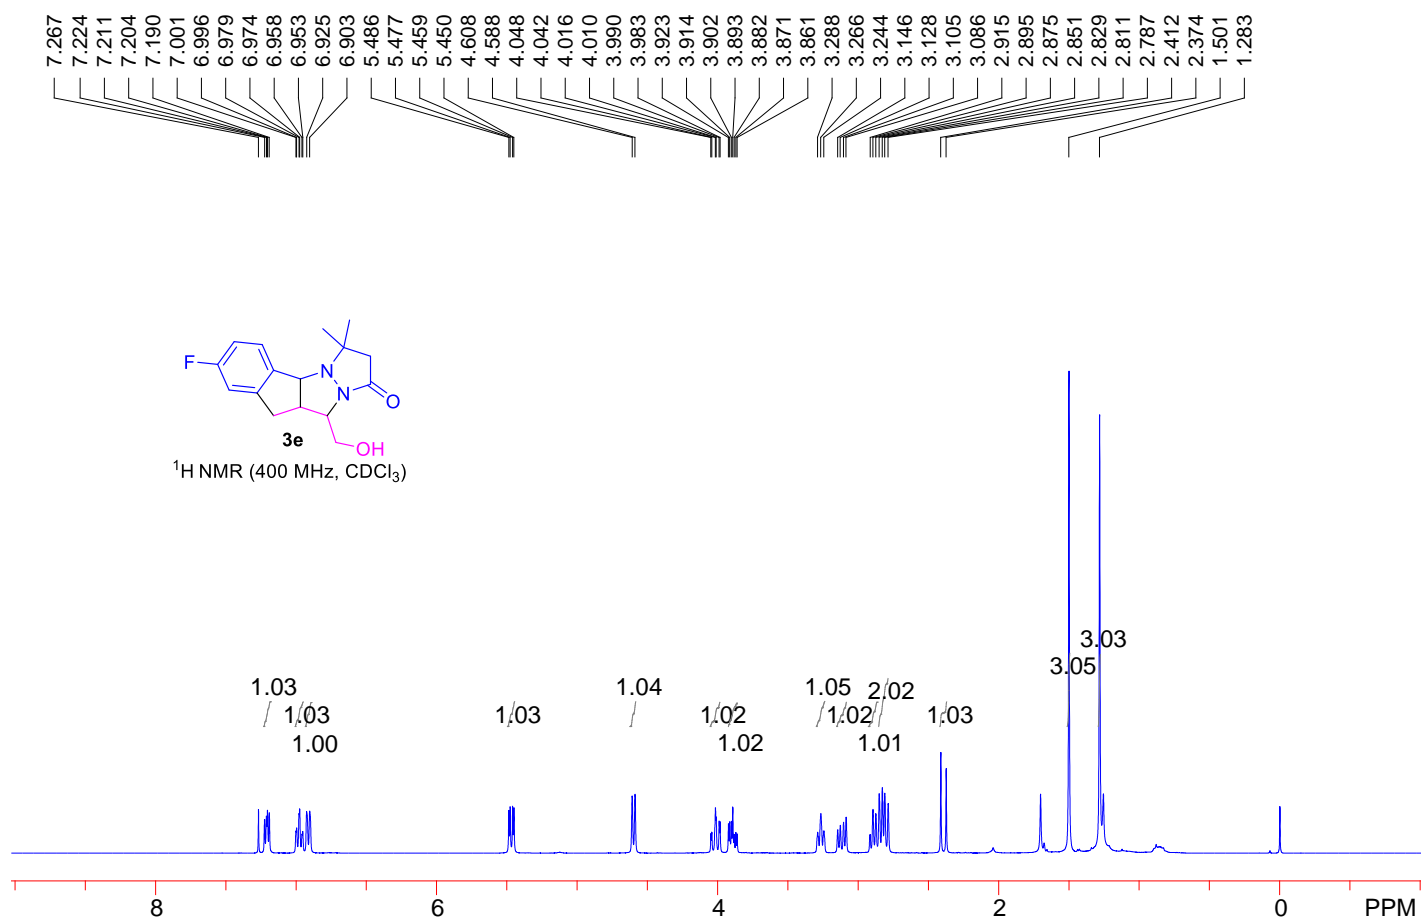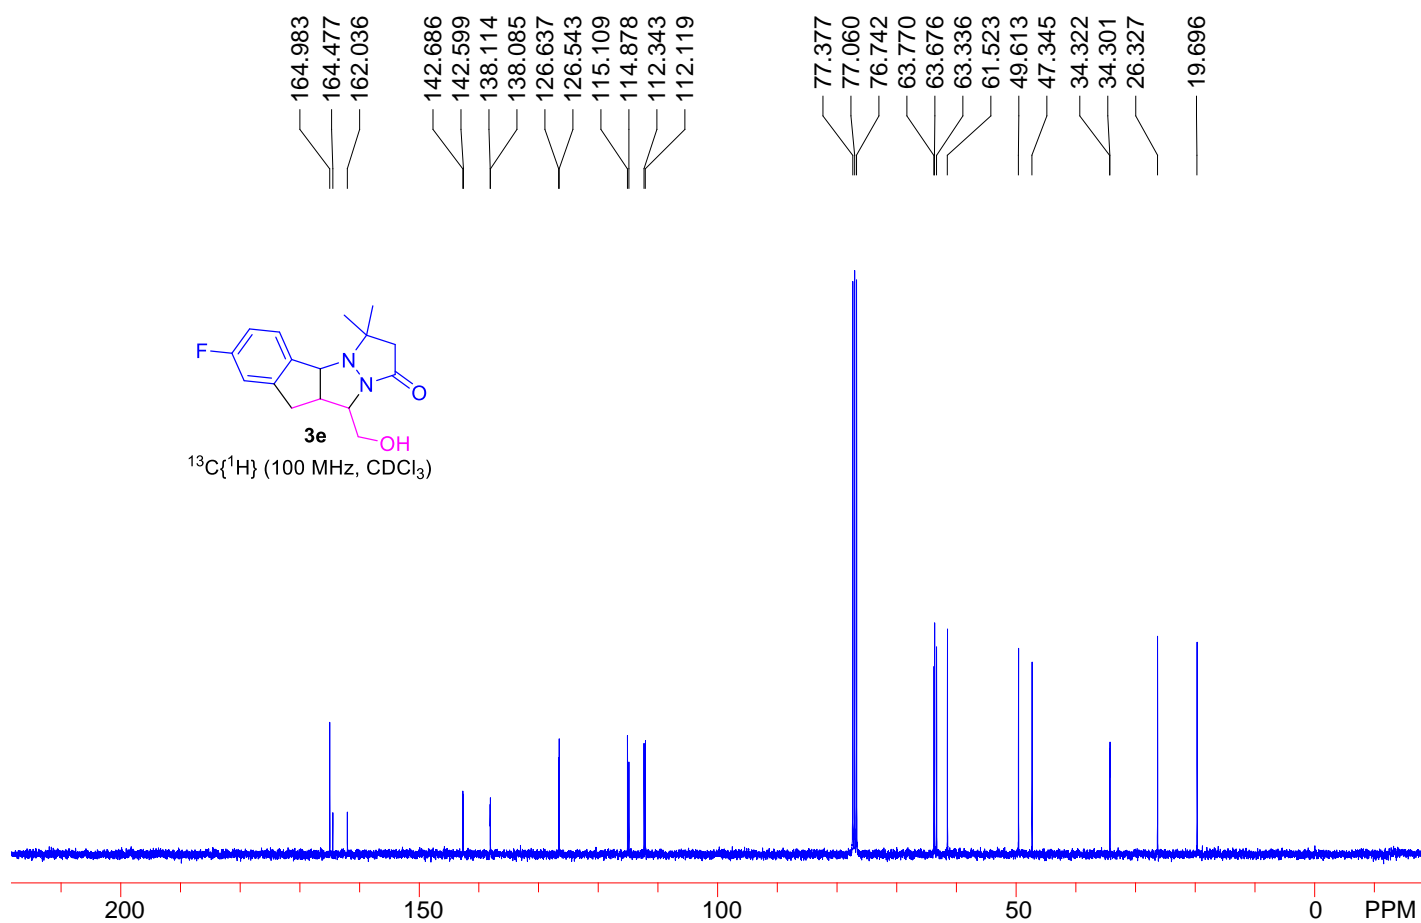



-114.298  
-114.312  
-114.323  
-114.337

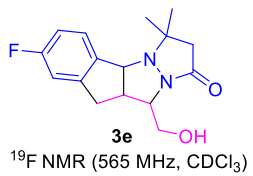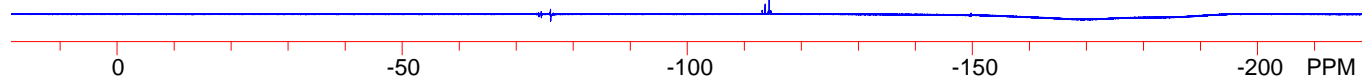

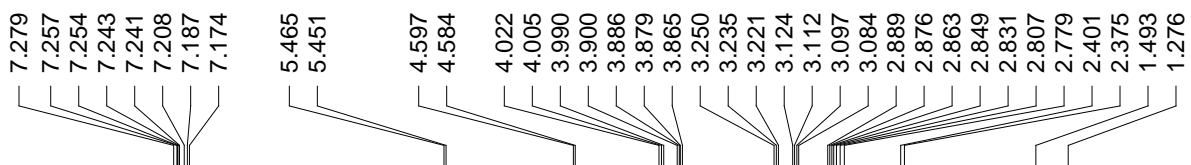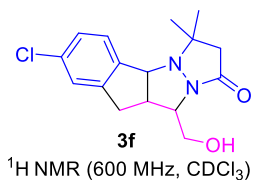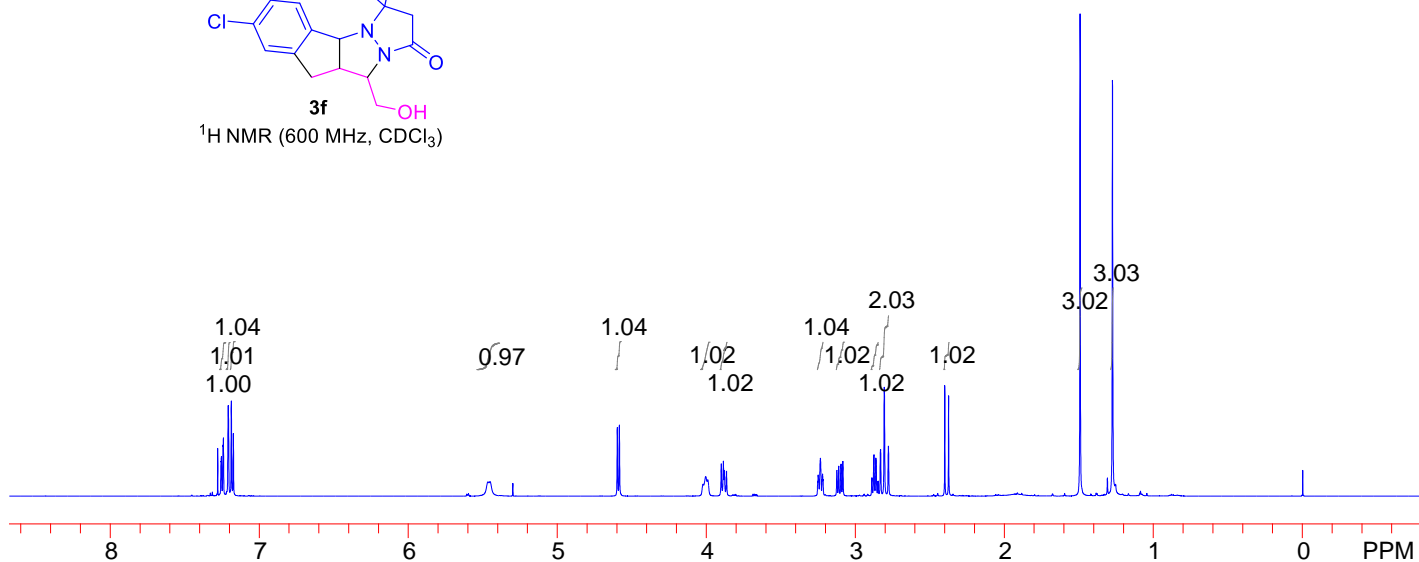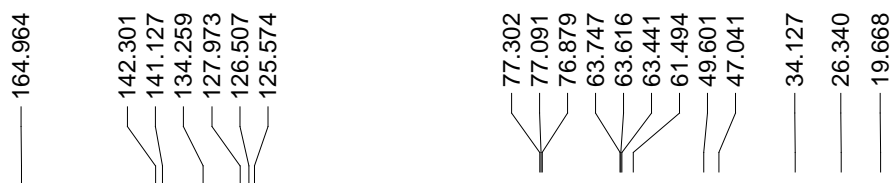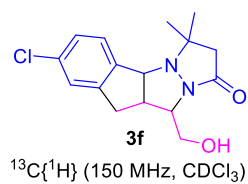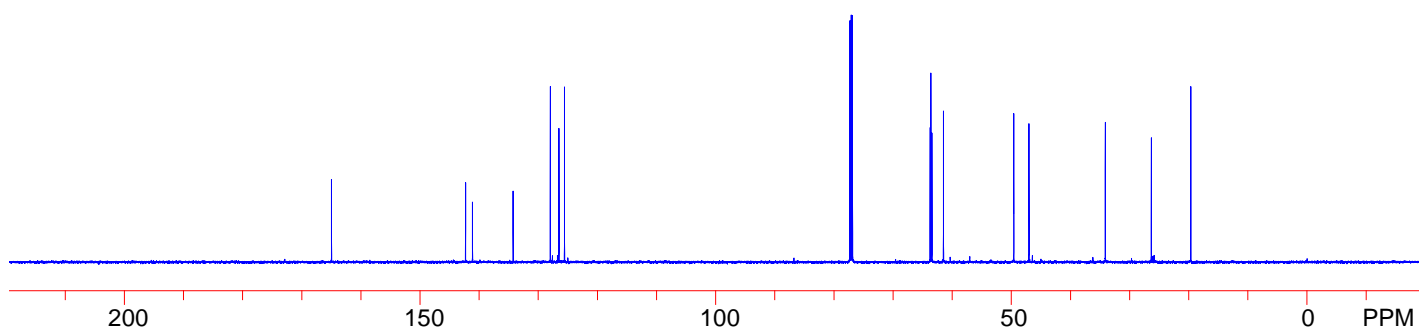

7.407  
7.394  
7.376  
7.270  
7.135  
7.122  
5.451  
5.445  
5.433  
5.427  
4.580  
4.566  
4.032  
4.028  
4.010  
4.007  
3.993  
3.989  
3.902  
3.897  
3.888  
3.882  
3.876  
3.867  
3.862  
3.252  
3.237  
3.222  
3.135  
3.123  
3.107  
3.095  
2.880  
2.866  
2.853  
2.834  
2.811  
2.787  
2.402  
2.377  
1.492  
1.276

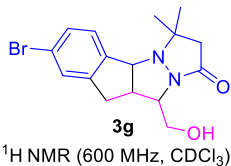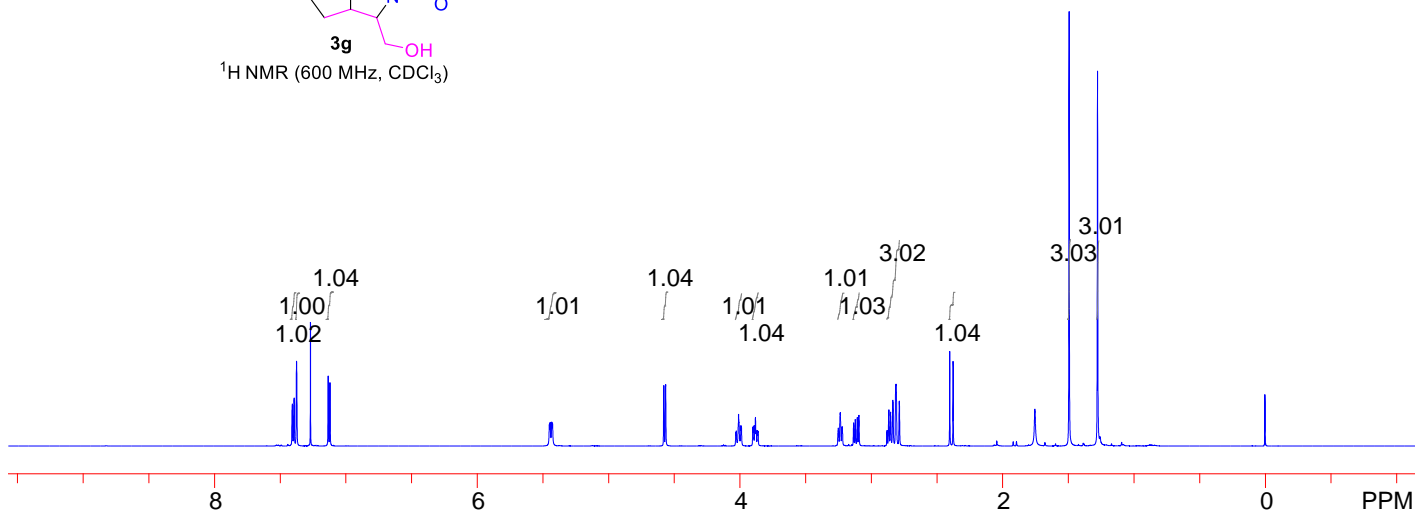

164.505  
144.919  
142.877  
130.153  
128.505  
128.017  
121.425

63.346  
62.988  
62.347  
59.962  
49.798  
48.660  
40.406  
40.267  
40.129  
39.990  
39.852  
39.713  
39.574  
35.010  
26.318  
19.726

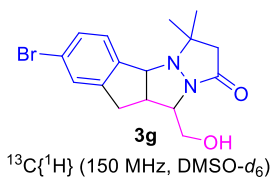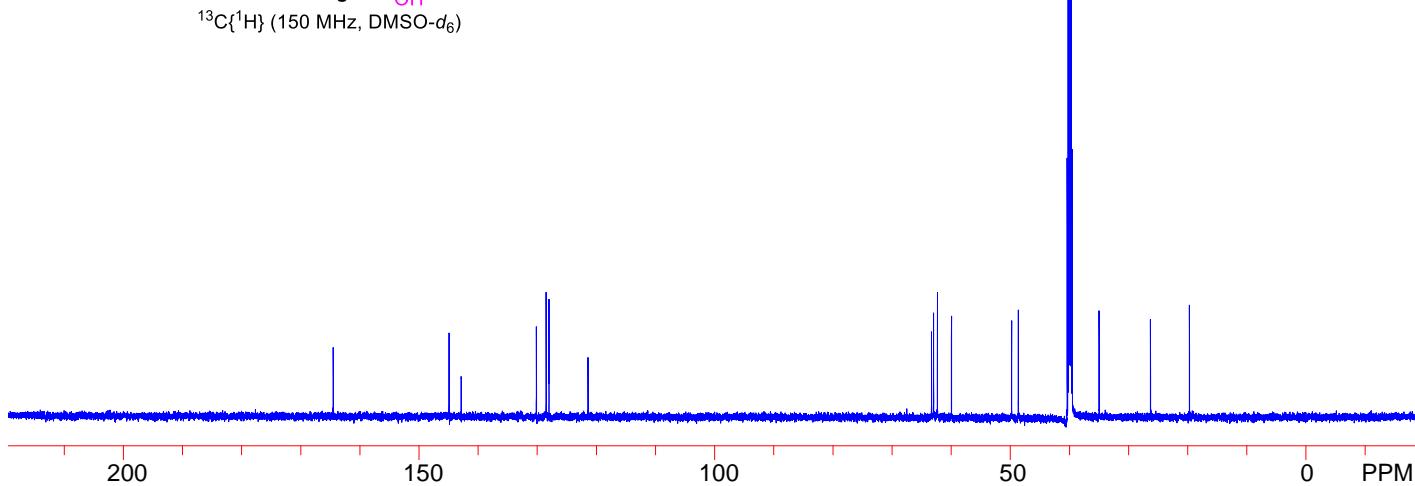

7.555  
7.542  
7.500  
7.384  
7.371  
7.263

5.383  
5.369

4.674  
4.660

4.061  
4.043  
4.026  
3.920  
3.905  
3.886  
3.247  
3.232  
3.218  
3.199  
3.187  
3.172  
3.160

2.947  
2.933  
2.920  
2.905  
2.896  
2.868  
2.849  
2.823  
2.419  
2.393  
1.525  
1.298

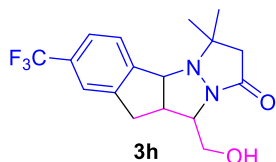

$^1\text{H NMR}$  (600 MHz,  $\text{CDCl}_3$ )

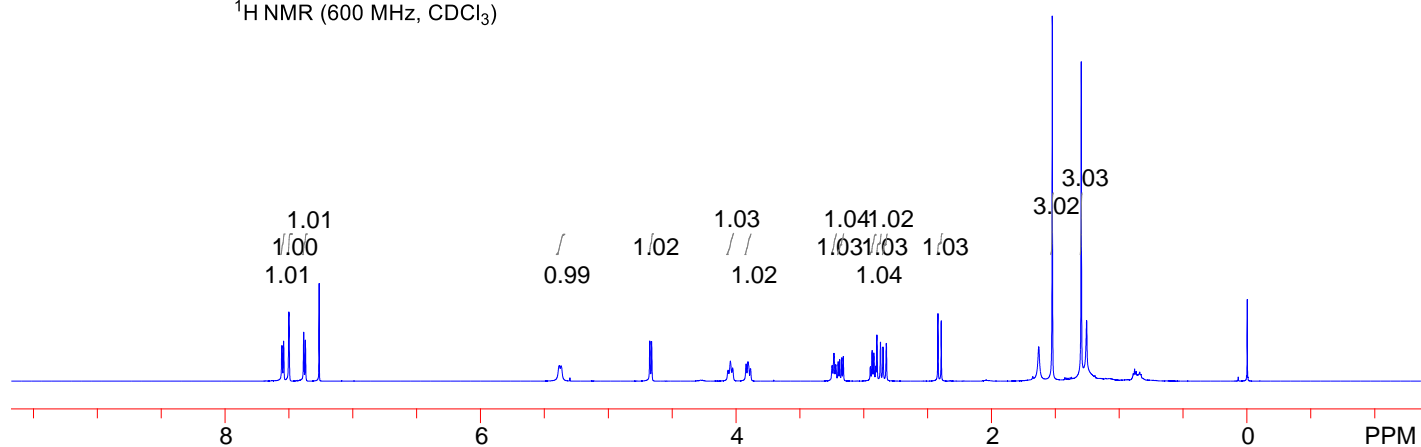

165.023

146.531  
141.135  
131.101  
130.882  
125.931  
125.042  
124.947  
124.925  
124.896  
124.874  
123.233  
122.555  
122.533  
122.504  
122.482

77.244  
77.032  
76.821

63.929  
63.761  
63.543  
61.348  
49.542  
46.815  
34.106  
26.376  
19.682

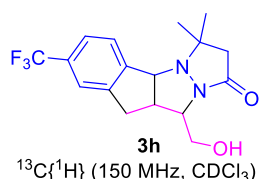

$^{13}\text{C}\{^1\text{H}\}$  (150 MHz,  $\text{CDCl}_3$ )

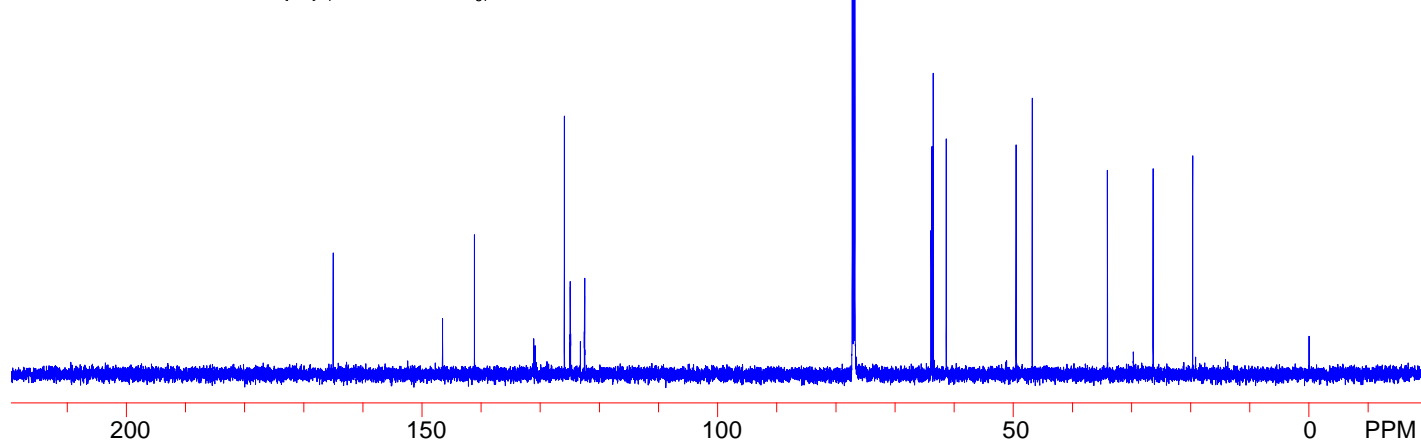

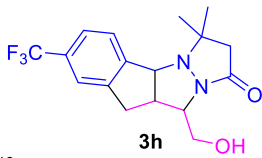

<sup>19</sup>F NMR (565 MHz, CDCl<sub>3</sub>)

62.237

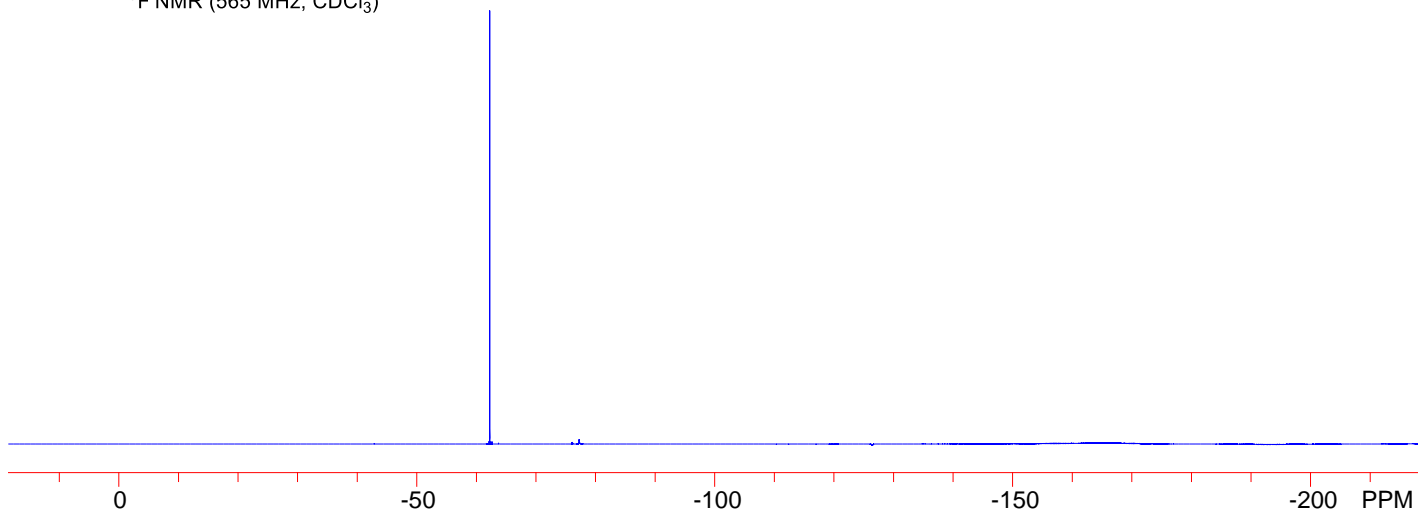

7.269  
7.153  
7.140  
7.097  
7.083  
7.038  
5.613  
5.607  
5.595  
5.589  
4.611  
4.597  
4.019  
4.015  
3.998  
3.994  
3.980  
3.976  
3.913  
3.908  
3.899  
3.893  
3.887  
3.878  
3.873  
3.291  
3.276  
3.262  
3.102  
3.090  
3.075  
3.063  
2.860  
2.858  
2.842  
2.831  
2.816  
2.796  
2.768  
2.407  
2.382  
2.338  
1.505  
1.284

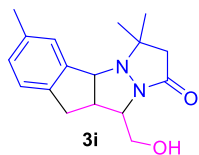

$^1\text{H NMR}$  (600 MHz,  $\text{CDCl}_3$ )

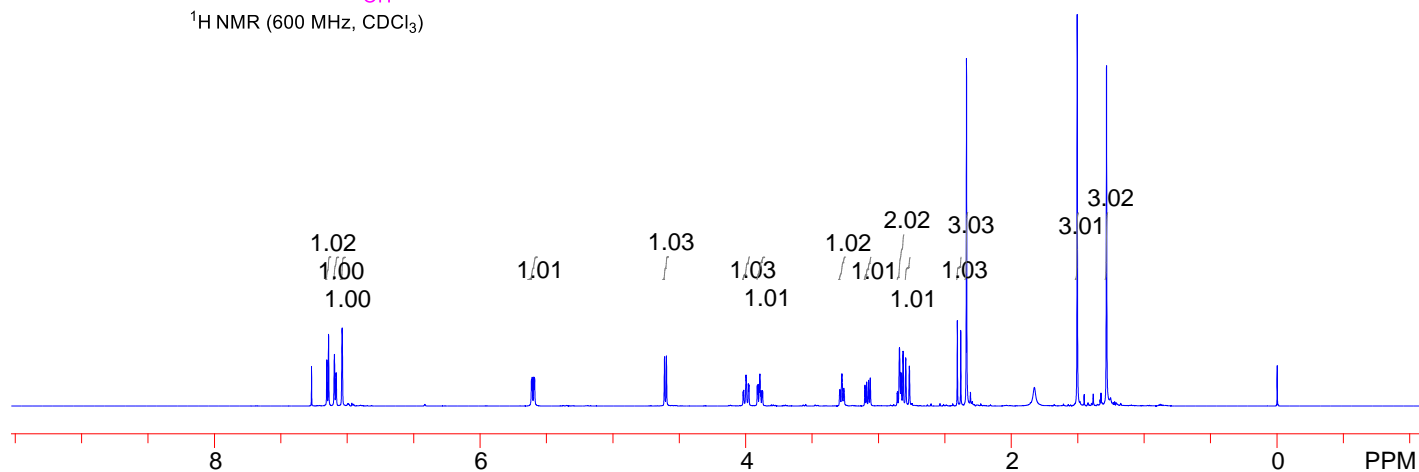

165.023  
142.462  
137.525  
137.234  
129.475  
125.683  
125.275  
77.273  
77.062  
76.850  
64.046  
63.871  
63.812  
61.588  
49.644  
46.976  
33.814  
26.347  
21.352  
19.661

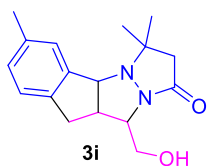

$^{13}\text{C}\{^1\text{H}\}$  (150 MHz,  $\text{CDCl}_3$ )

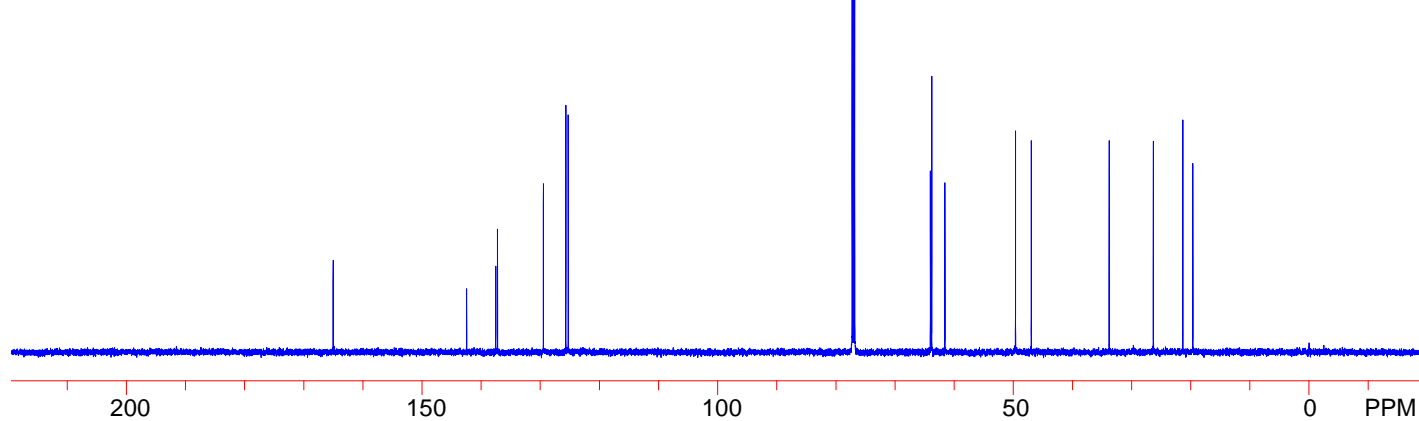



7.393  
7.390  
7.379  
7.377  
7.369  
7.270  
7.109  
7.096  
5.433  
5.427  
5.415  
5.409  
4.622  
4.608  
4.039  
4.035  
4.017  
4.014  
4.000  
3.996  
3.910  
3.904  
3.896  
3.890  
3.883  
3.875  
3.869  
3.241  
3.226  
3.211  
3.078  
3.066  
3.050  
3.038  
2.874  
2.860  
2.848  
2.834  
2.832  
2.824  
2.774  
2.746  
2.402  
2.376  
1.517  
1.269

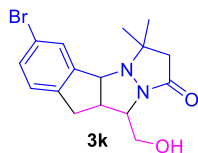

$^1\text{H NMR}$  (600 MHz,  $\text{CDCl}_3$ )

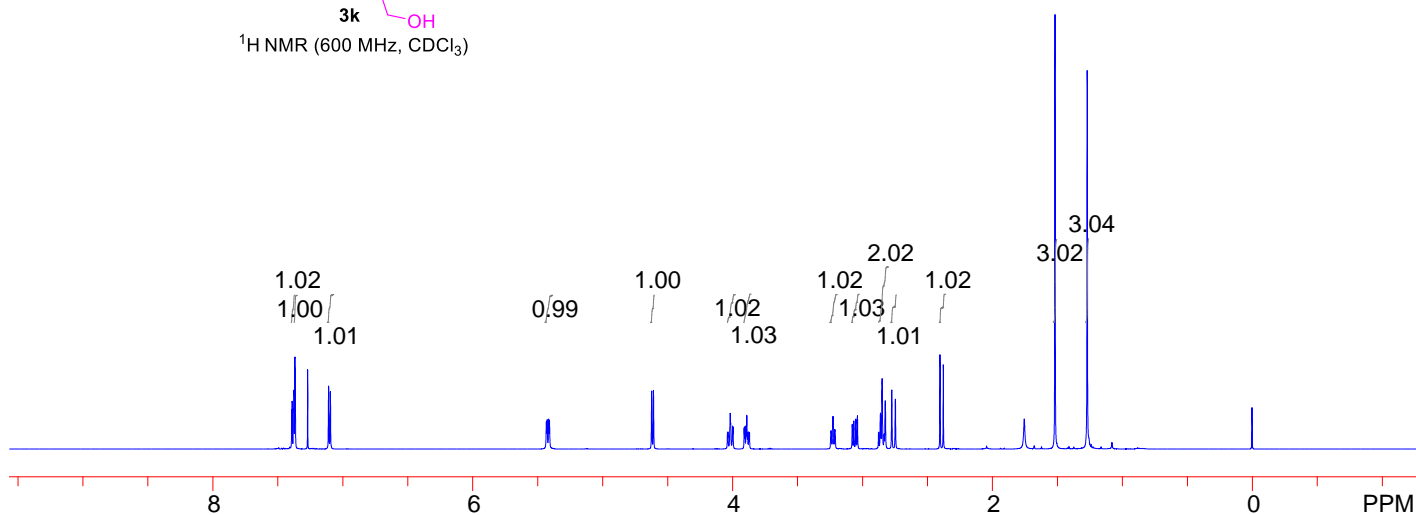

165.081  
145.036  
139.180  
131.597  
128.622  
127.025  
121.367  
77.273  
77.062  
76.850  
63.929  
63.820  
63.659  
61.406  
49.535  
46.932  
33.741  
26.354  
19.631

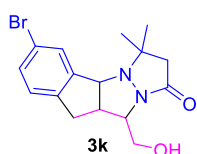

$^{13}\text{C}\{^1\text{H}\}$  (150 MHz,  $\text{CDCl}_3$ )

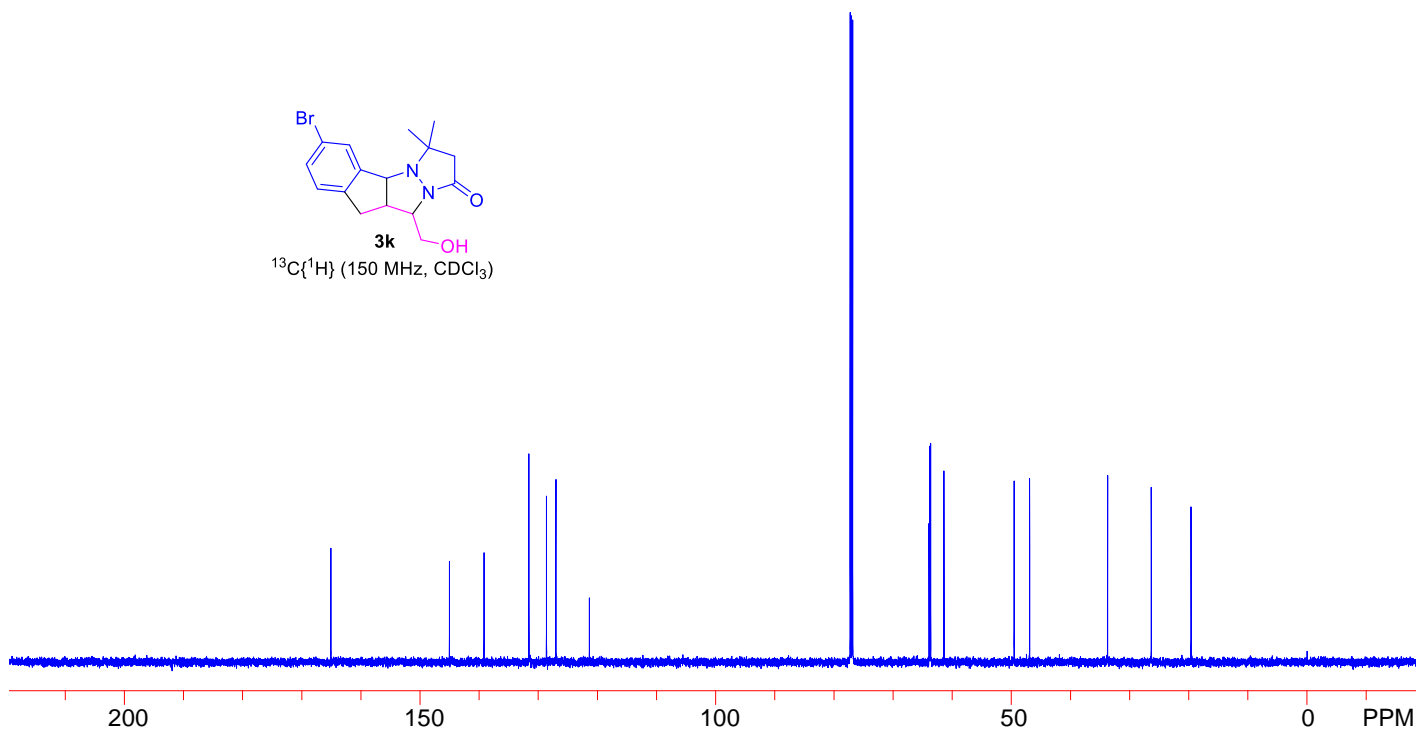



7.267  
7.132  
7.119  
6.836  
6.833  
6.822  
6.819  
6.782  
6.779  
5.518  
5.503  
4.608  
4.595  
4.026  
4.008  
3.991  
3.914  
3.900  
3.879  
3.810  
3.278  
3.262  
3.248  
3.070  
3.058  
3.044  
3.031  
2.864  
2.849  
2.836  
2.822  
2.757  
2.730  
2.405  
2.380  
1.522  
1.278

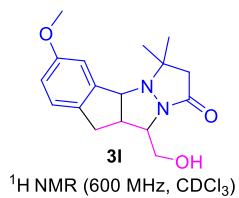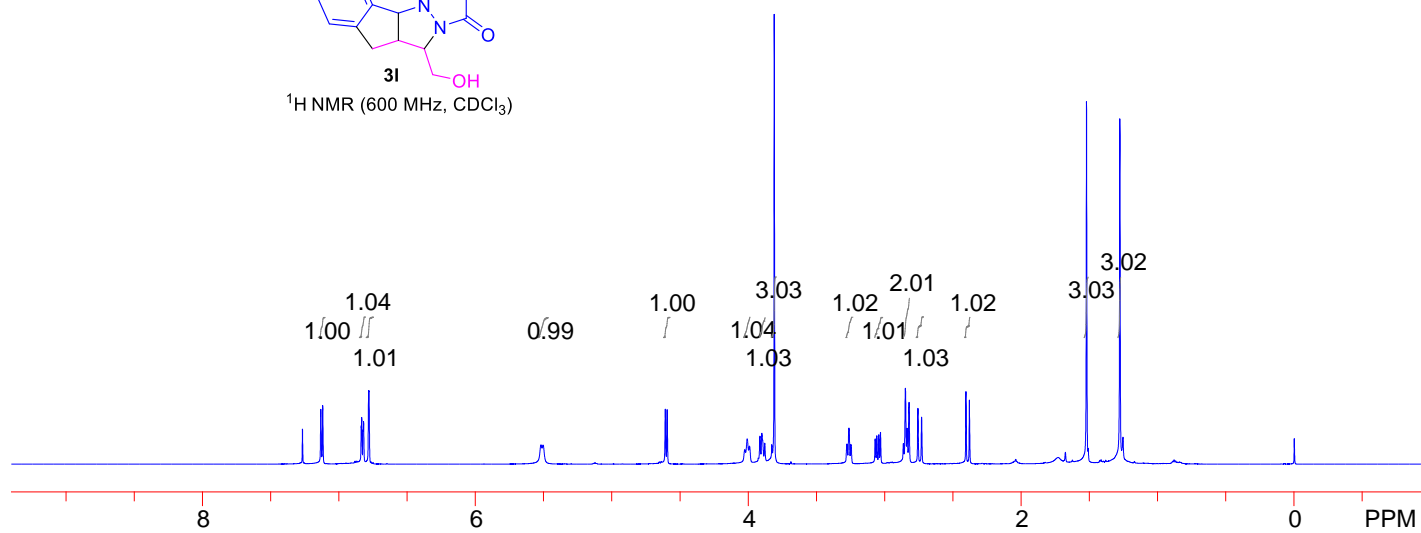

164.913  
159.729  
143.964  
132.093  
126.179  
114.702  
110.298  
77.266  
77.054  
76.843  
64.119  
63.834  
63.747  
61.661  
55.463  
49.666  
47.282  
33.427  
26.354  
19.624

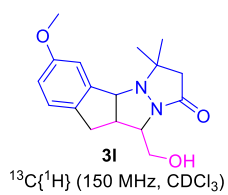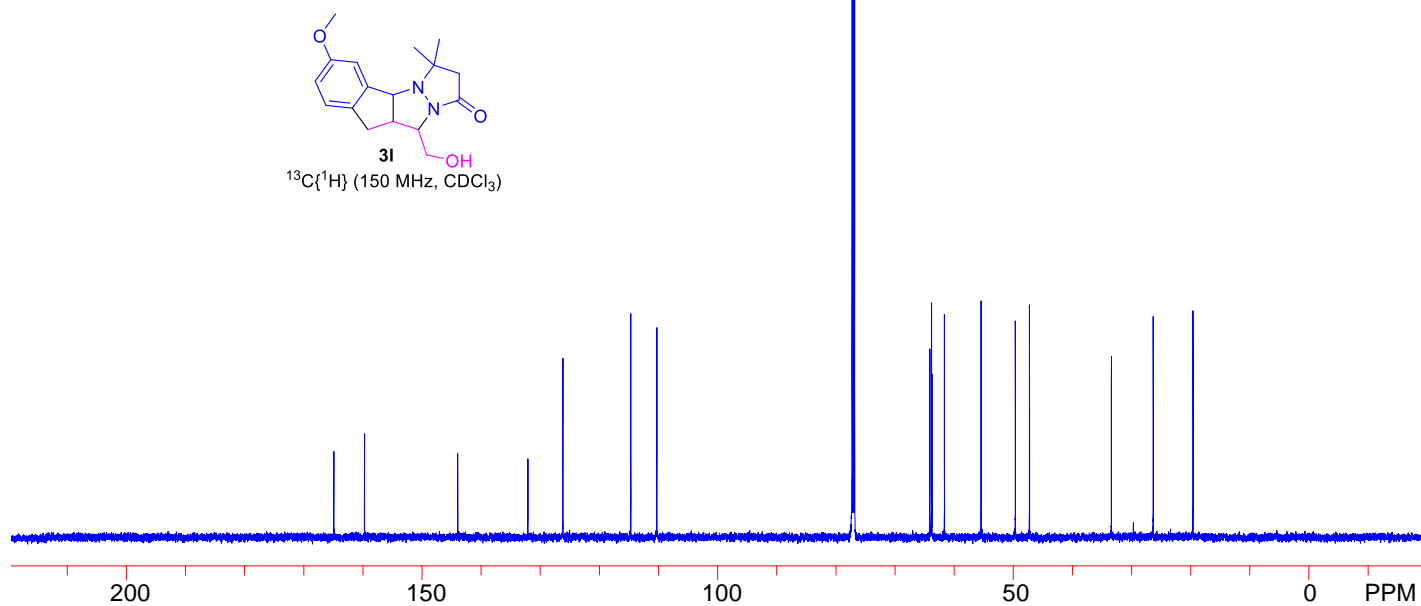

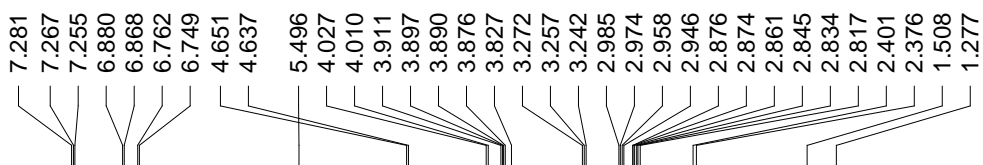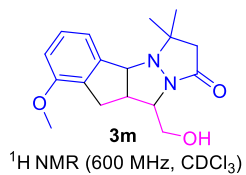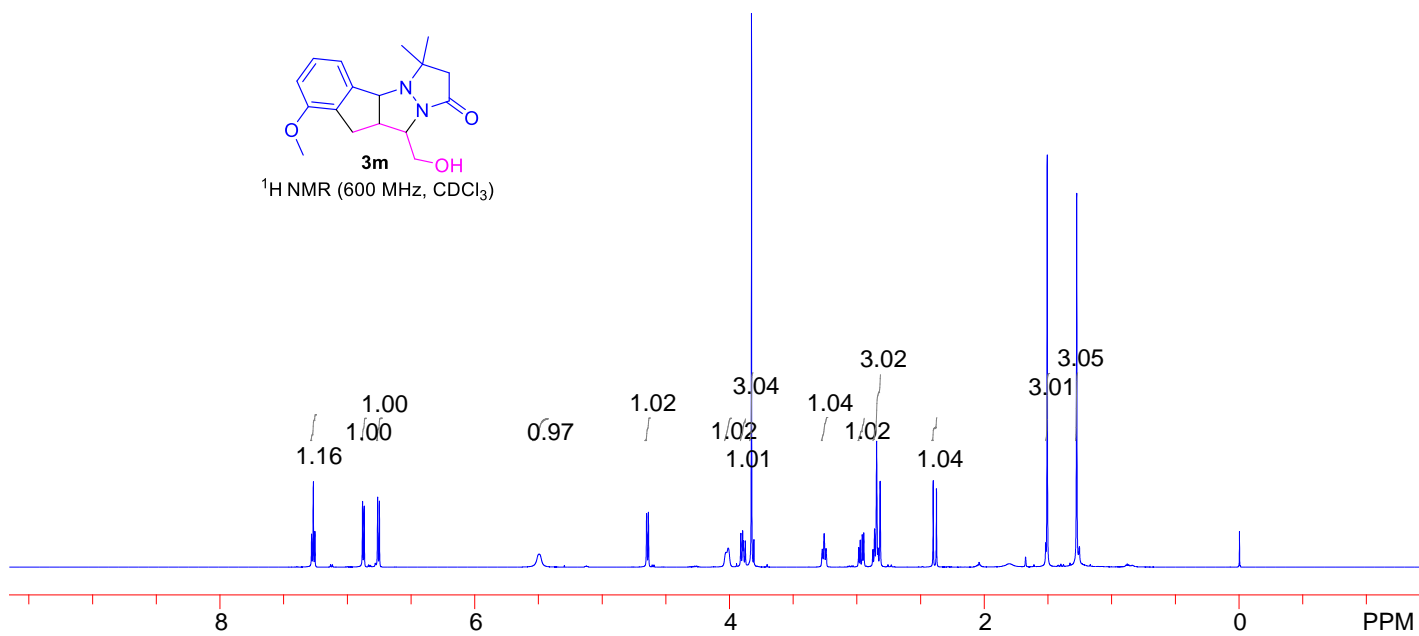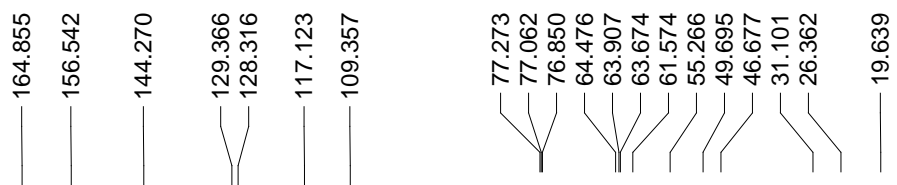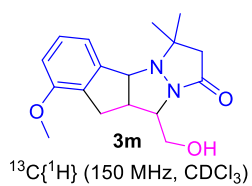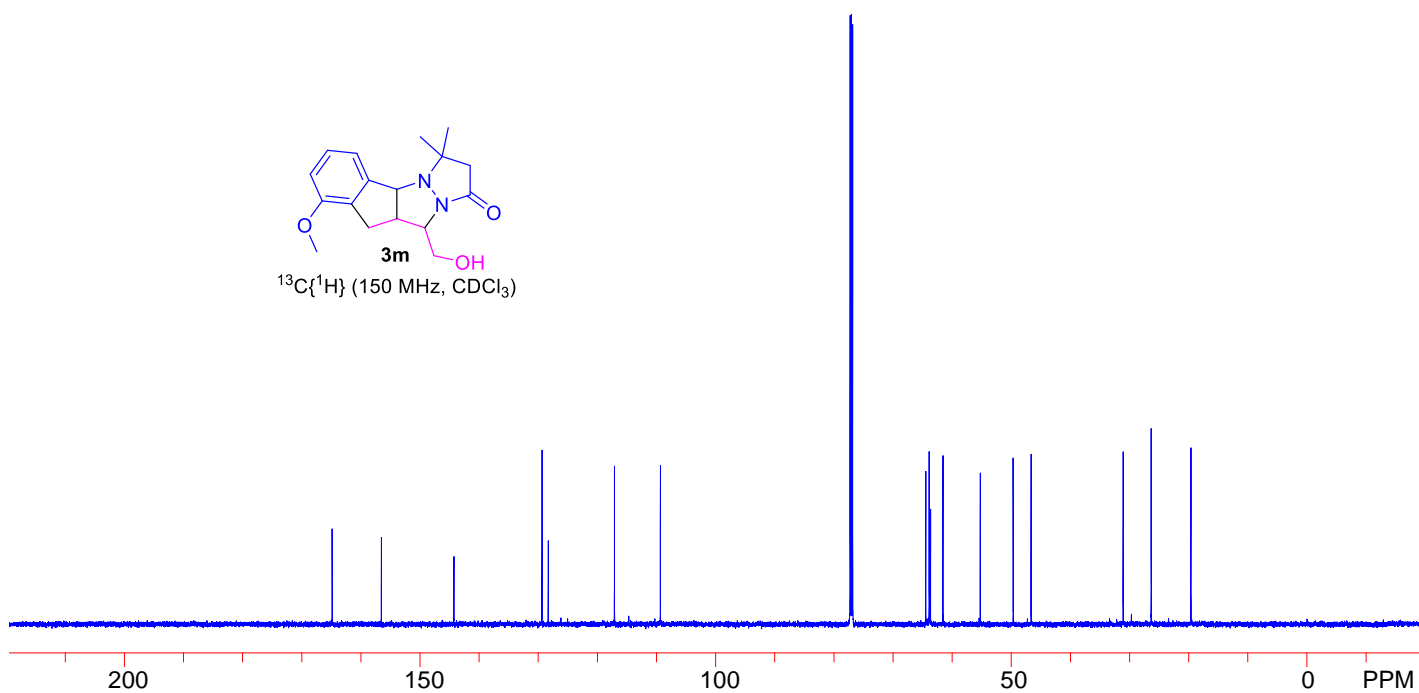

7.273  
7.180  
7.170  
7.166  
7.158  
6.977  
6.962  
6.946  
6.932  
5.462  
5.456  
5.444  
5.438  
4.618  
4.604  
4.036  
4.015  
3.997  
3.914  
3.909  
3.900  
3.894  
3.888  
3.880  
3.874  
3.256  
3.242  
3.227  
3.096  
3.084  
3.069  
3.057  
2.896  
2.883  
2.868  
2.854  
2.844  
2.818  
2.784  
2.756  
2.405  
2.380  
1.507  
1.273

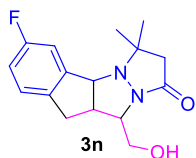

$^1\text{H NMR}$  (600 MHz,  $\text{CDCl}_3$ )

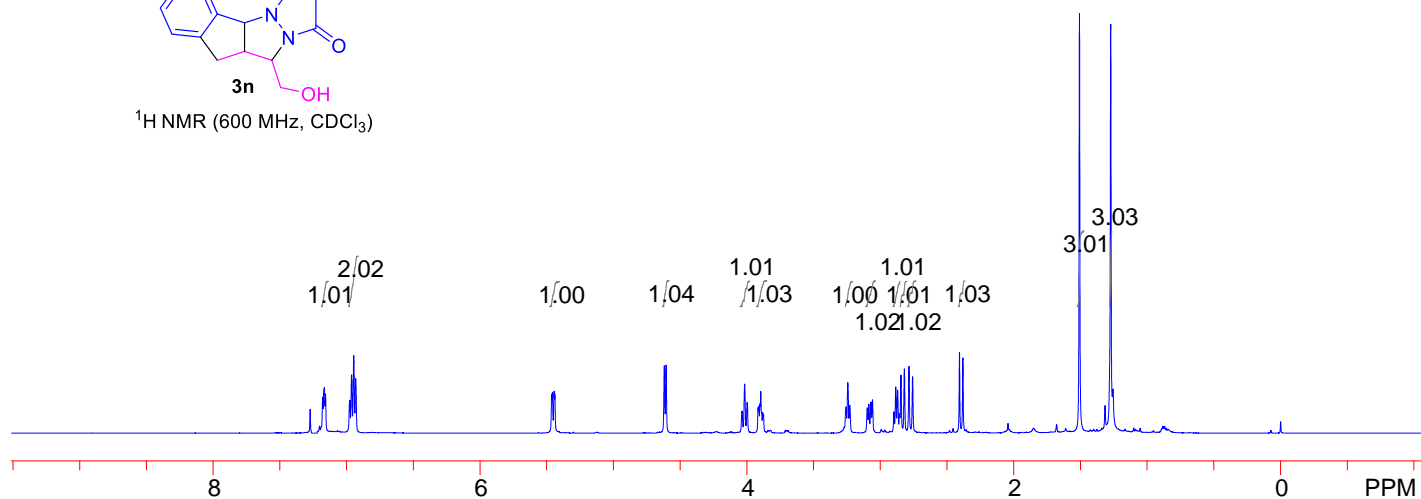

164.993  
163.586  
161.960  
144.810  
144.759  
135.535  
135.520  
126.639  
126.580  
115.818  
115.672  
112.245  
112.091  
77.288  
77.076  
76.865  
63.914  
63.900  
63.820  
63.703  
61.472  
49.564  
47.296  
33.478  
26.311  
19.602

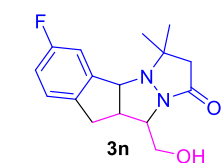

$^{13}\text{C}\{^1\text{H}\}$  (150 MHz,  $\text{CDCl}_3$ )

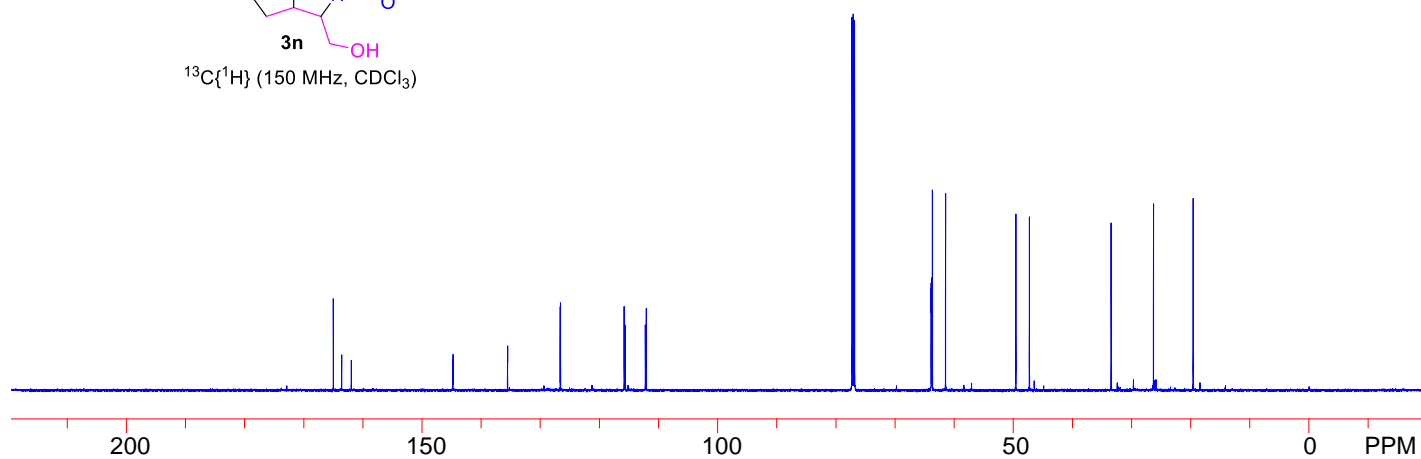

115.224  
115.238  
115.246  
115.260

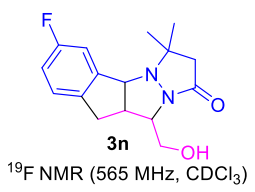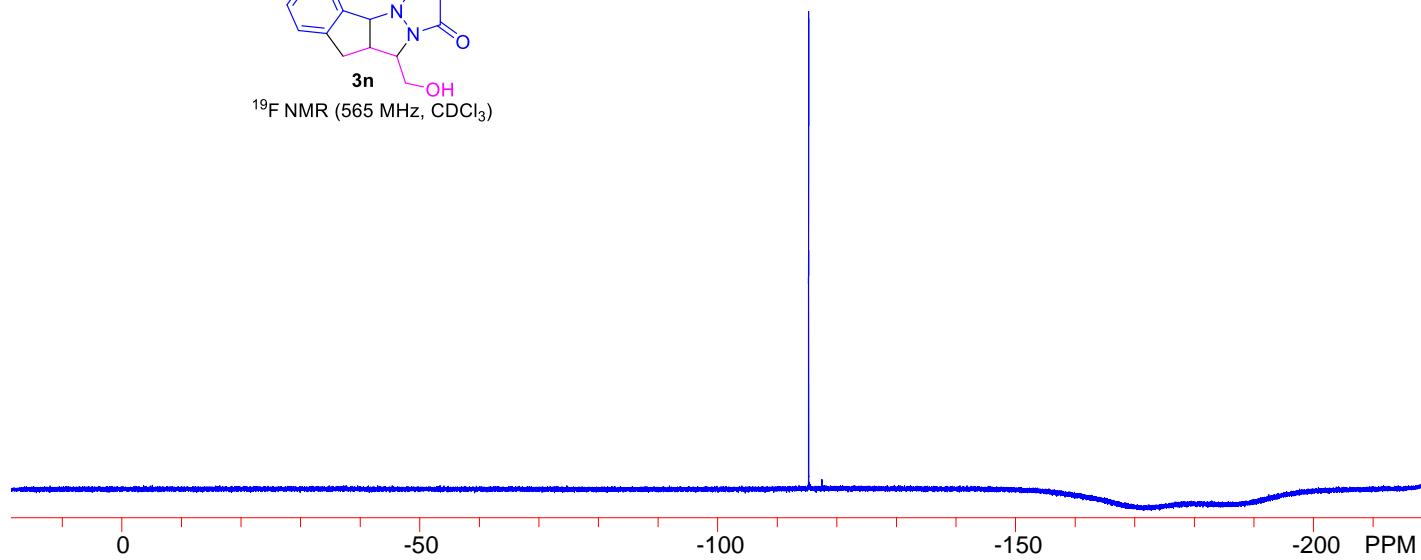

7.291  
7.282  
7.277  
7.272  
7.269  
7.265  
7.256  
7.067  
7.054  
6.975  
6.960  
6.946  
5.431  
5.425  
5.413  
5.407  
4.668  
4.655  
4.062  
4.057  
4.043  
4.040  
4.036  
4.022  
4.018  
3.920  
3.914  
3.906  
3.900  
3.893  
3.885  
3.879  
3.276  
3.262  
3.247  
3.101  
3.089  
3.073  
3.061  
2.927  
2.918  
2.916  
2.900  
2.845  
2.819  
2.410  
2.384  
1.509  
1.285

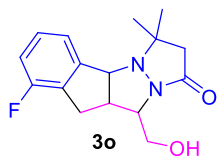

$^1\text{H NMR}$  (600 MHz,  $\text{CDCl}_3$ )

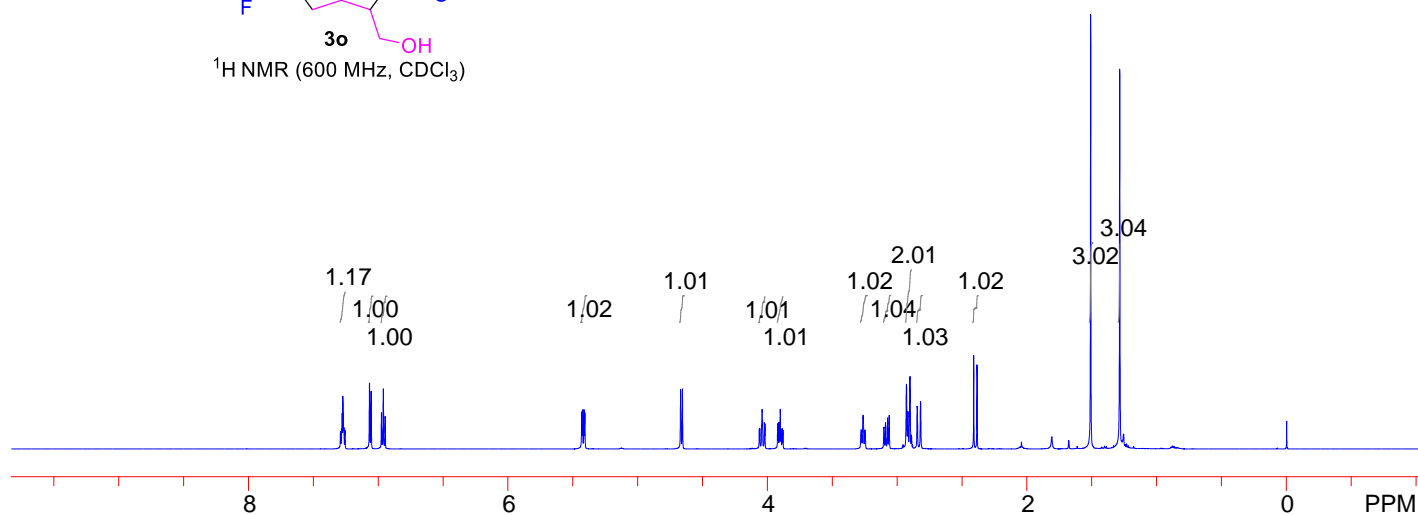

164.957  
160.509  
158.861  
146.108  
146.071  
129.811  
129.759  
126.850  
126.733  
120.958  
120.936  
114.811  
114.673  
77.280  
77.069  
76.857  
64.206  
64.192  
63.761  
63.630  
61.406  
49.601  
46.837  
30.285  
26.362  
19.668

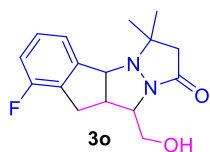

$^{13}\text{C}\{^1\text{H}\}$  (150 MHz,  $\text{CDCl}_3$ )

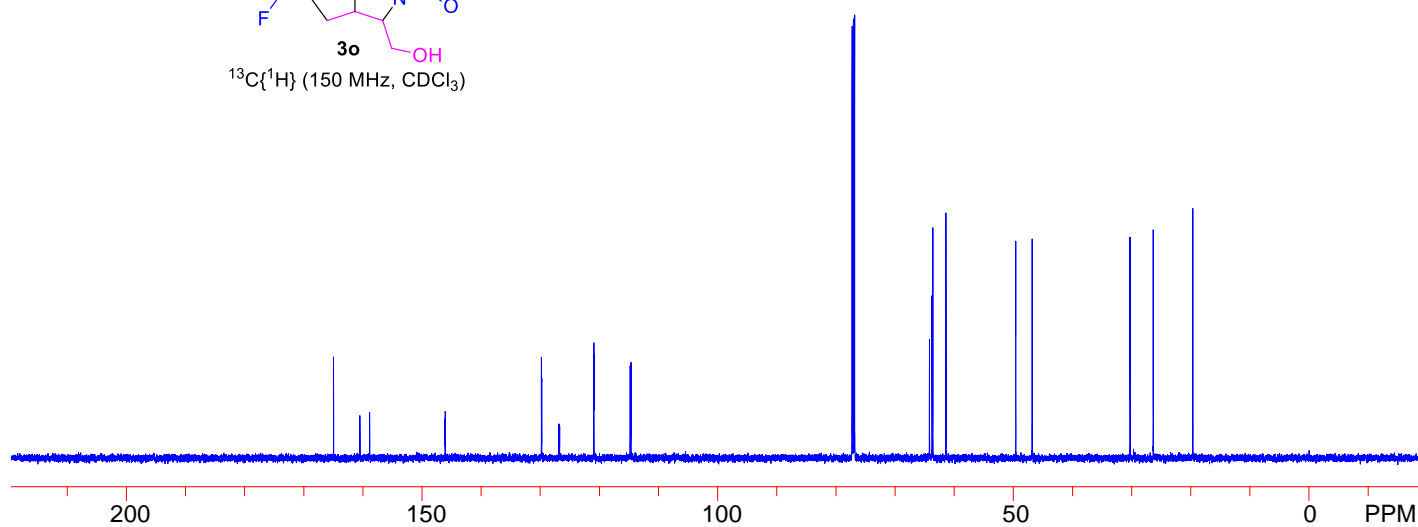

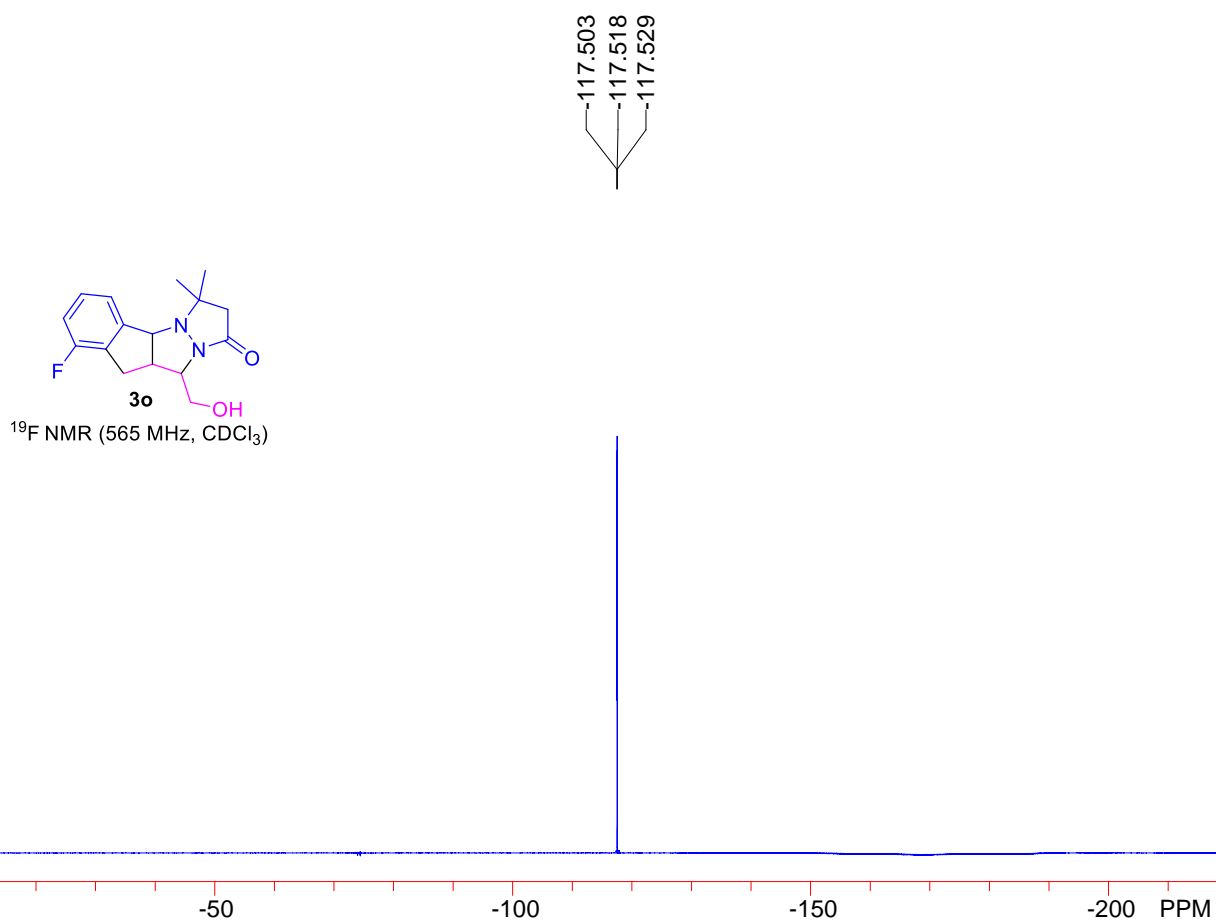

7.266  
7.170  
7.151  
7.133  
7.052  
7.034  
7.011  
6.992  
5.319  
5.310  
5.293  
5.284  
4.709  
4.691  
4.076  
4.070  
4.045  
4.019  
4.013  
3.964  
3.955  
3.943  
3.934  
3.924  
3.912  
3.903  
3.242  
3.220  
3.199  
3.040  
3.023  
3.000  
2.983  
2.861  
2.823  
2.783  
2.766  
2.760  
2.743  
2.483  
2.291  
2.254  
1.517  
1.245

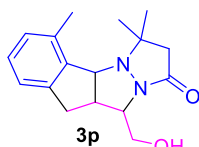

$^1\text{H NMR}$  (400 MHz,  $\text{CDCl}_3$ )

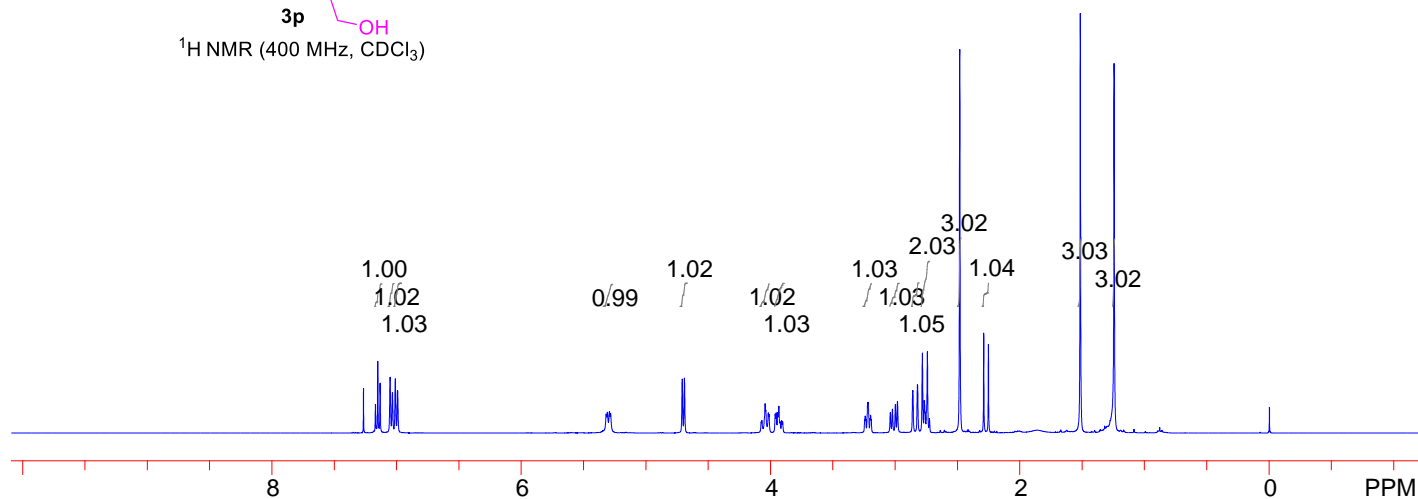

167.142  
140.635  
139.645  
136.142  
129.389  
128.659  
123.177  
77.399  
77.081  
76.764  
66.832  
65.207  
64.268  
61.610  
49.519  
46.731  
33.542  
26.450  
19.949  
19.285

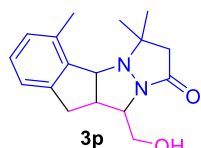

$^{13}\text{C}\{^1\text{H}\}$  (100 MHz,  $\text{CDCl}_3$ )

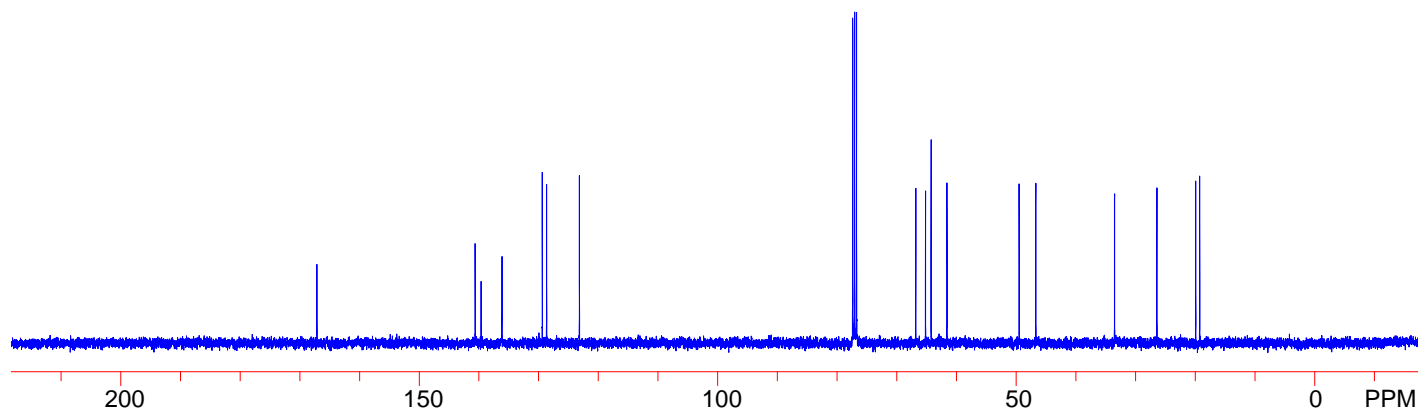

7.284  
7.266  
7.252  
7.245  
7.232  
7.023  
7.005  
6.938  
6.915  
6.894  
5.488  
4.812  
4.792  
4.031  
4.025  
4.000  
3.993  
3.922  
3.902  
3.891  
3.870  
3.413  
3.392  
3.371  
3.152  
3.132  
3.110  
3.090  
2.953  
2.947  
2.919  
2.913  
2.898  
2.892  
2.878  
2.838  
2.408  
2.370  
1.475  
1.470  
1.323

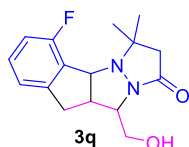

$^1\text{H NMR}$  (400 MHz,  $\text{CDCl}_3$ )

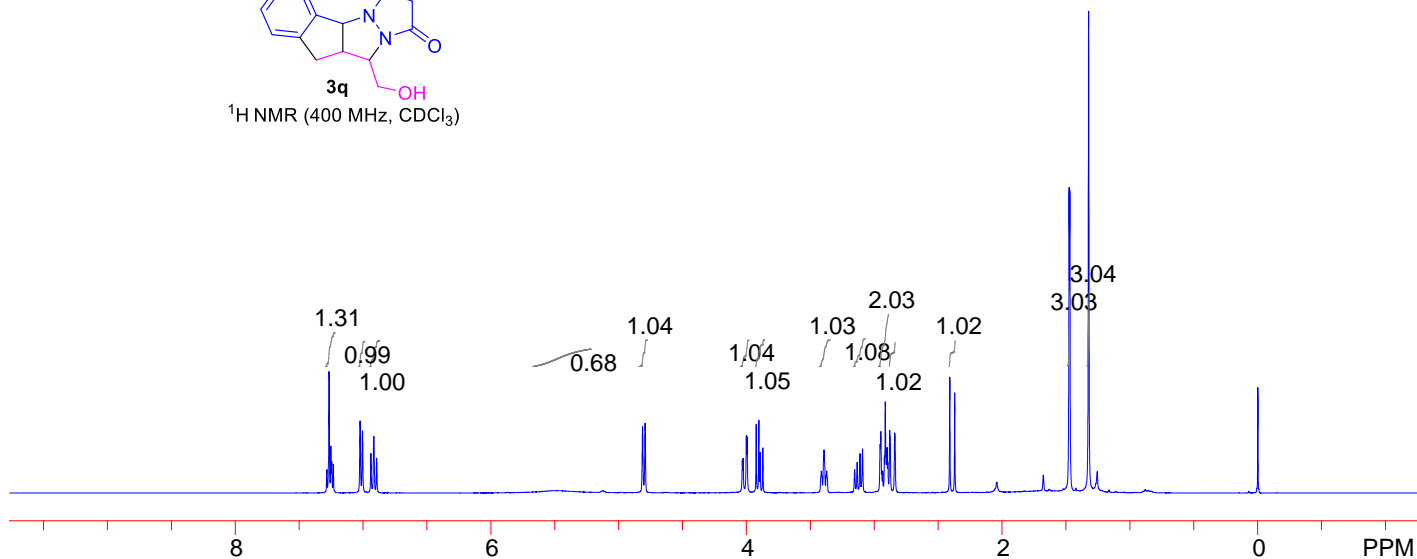

164.921  
160.895  
159.240  
144.591  
144.555  
130.861  
130.809  
128.418  
128.323  
121.184  
121.162  
114.410  
114.272

77.273  
77.062  
76.850  
64.359  
63.163  
62.099  
62.084  
62.048  
49.987  
47.924  
35.068  
25.778  
25.742  
19.639

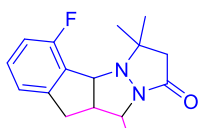

$^{13}\text{C}\{^1\text{H}\}$  (150 MHz,  $\text{CDCl}_3$ )

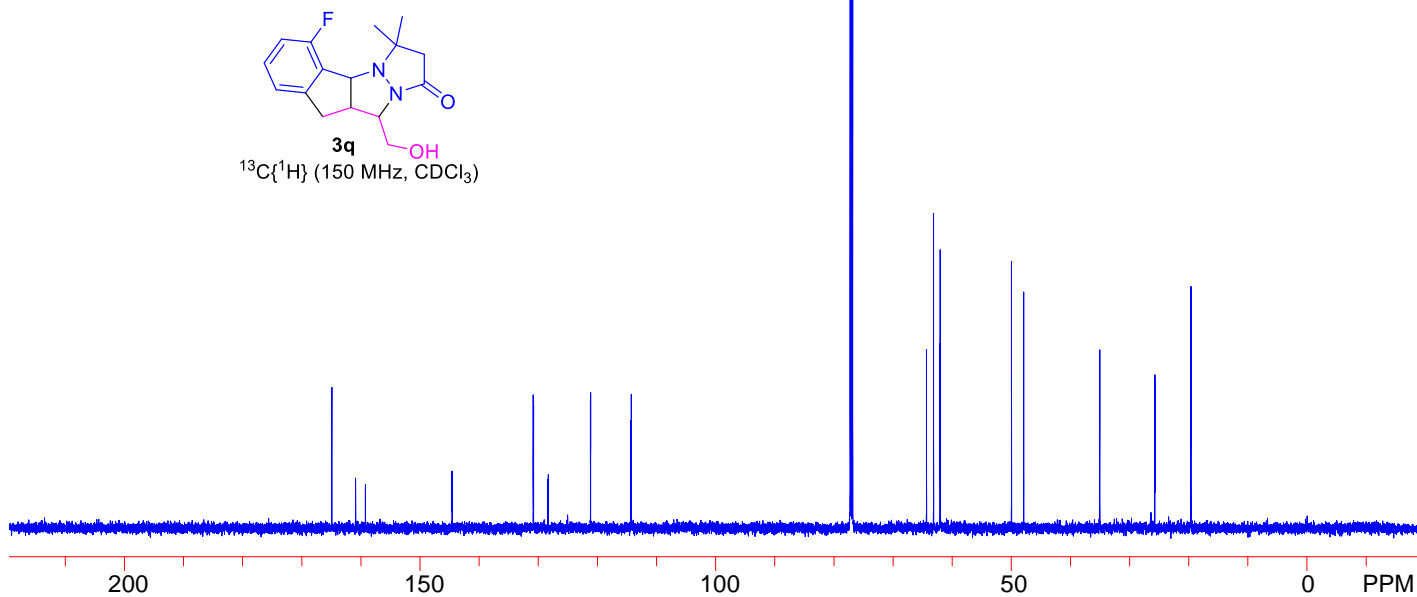



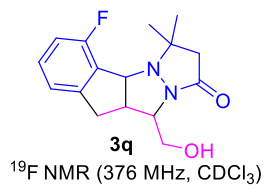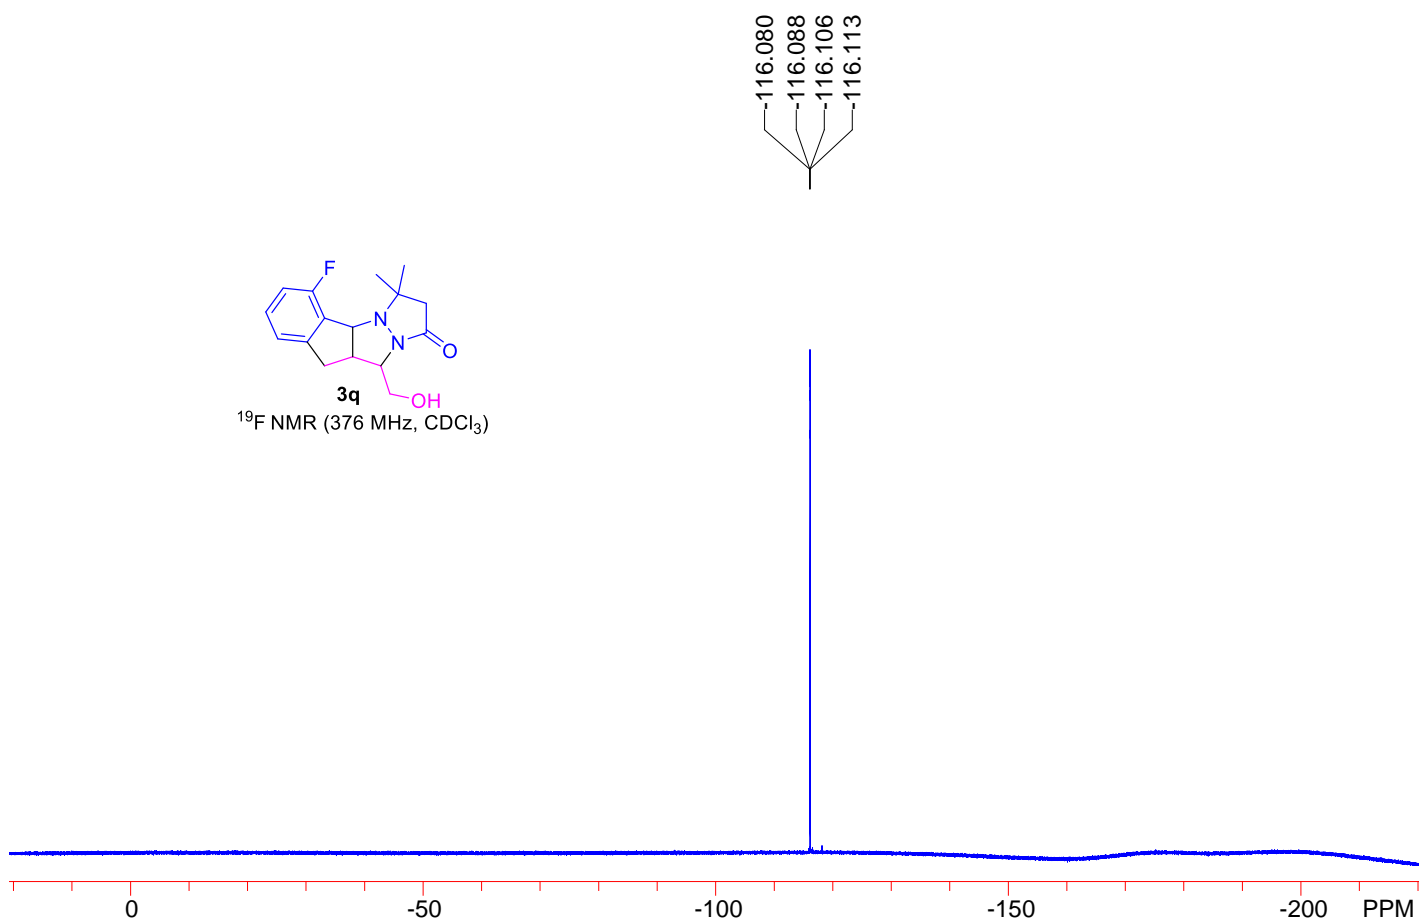

7.264  
7.009  
6.997  
5.569  
5.564  
5.551  
5.546  
4.599  
4.585  
4.018  
4.014  
3.996  
3.979  
3.975  
3.909  
3.904  
3.894  
3.889  
3.874  
3.869  
3.269  
3.254  
3.239  
3.066  
3.054  
3.039  
3.027  
2.844  
2.835  
2.820  
2.808  
2.755  
2.728  
2.399  
2.373  
2.261  
2.237  
1.525  
1.277

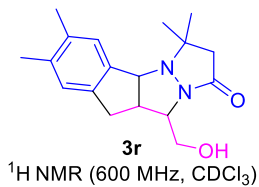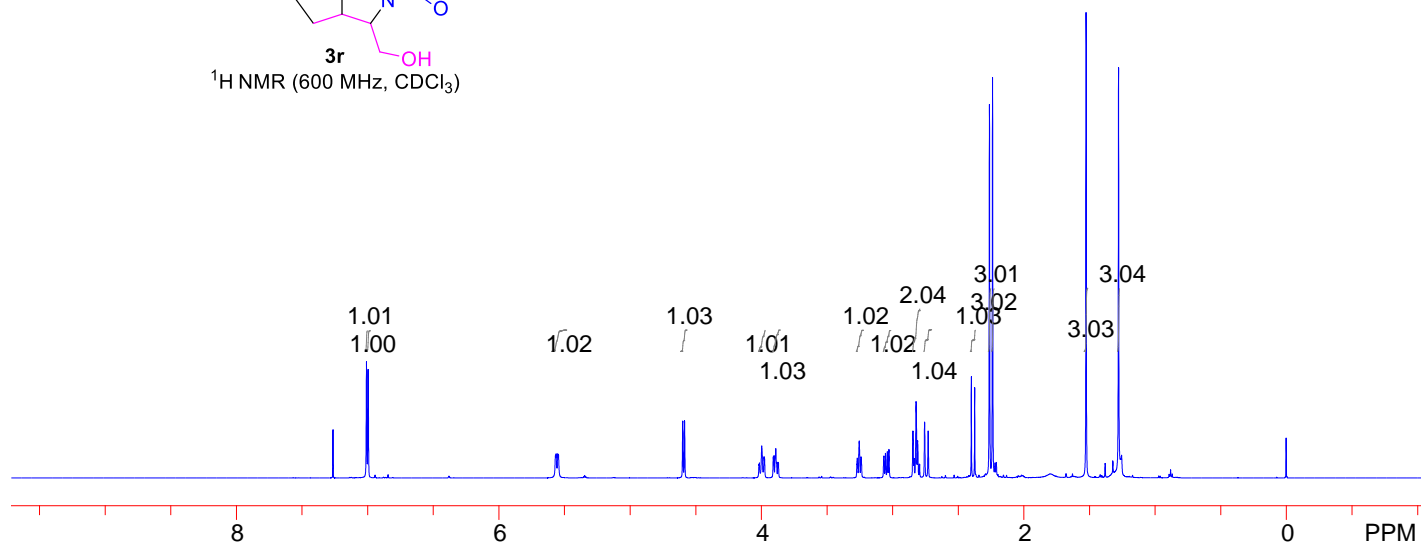

164.913  
139.968  
137.788  
137.066  
136.191  
126.449  
126.019  
77.288  
77.069  
76.857  
63.914  
63.885  
63.674  
61.763  
49.739  
47.078  
33.952  
26.391  
19.945  
19.879  
19.668

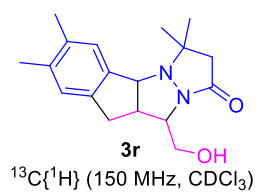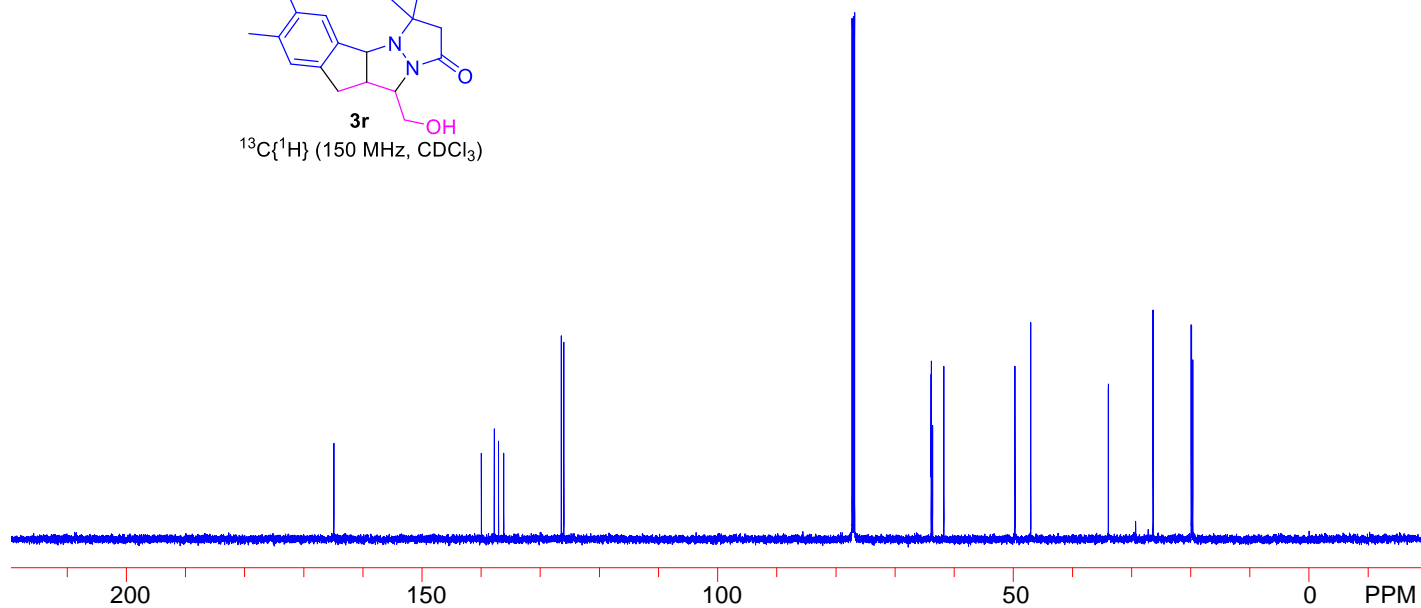

7.268  
7.045  
7.033  
6.863  
6.847

5.472  
5.467  
5.454  
5.449  
4.584  
4.571

4.032  
4.011  
3.994  
3.990  
3.910  
3.906  
3.896  
3.891  
3.885  
3.875  
3.871

3.263  
3.248  
3.233  
3.091  
3.079  
3.064  
3.051  
2.876  
2.874  
2.861  
2.849  
2.832  
2.825  
2.772  
2.745  
2.402  
2.377  
2.267  
1.519  
1.275

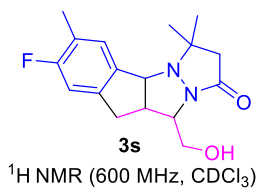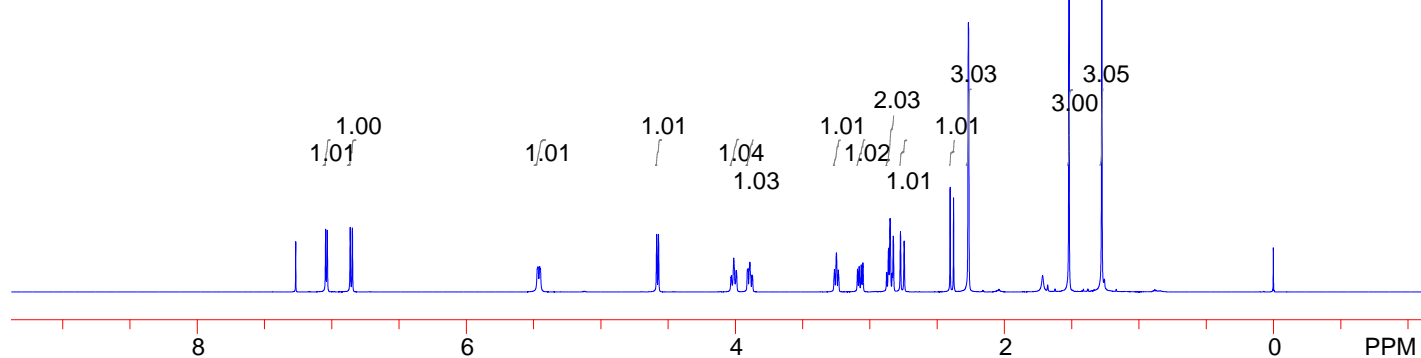

165.030  
162.558  
160.932

139.567  
139.509  
137.817  
137.802  
127.703  
127.667  
124.662  
124.539  
111.844  
111.690

77.266  
77.054  
76.843  
63.805  
63.783  
63.477  
61.537  
49.637  
47.253  
33.982  
33.967  
26.362

19.653  
14.775  
14.746

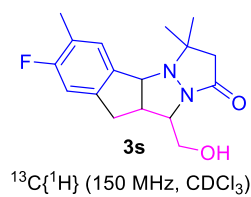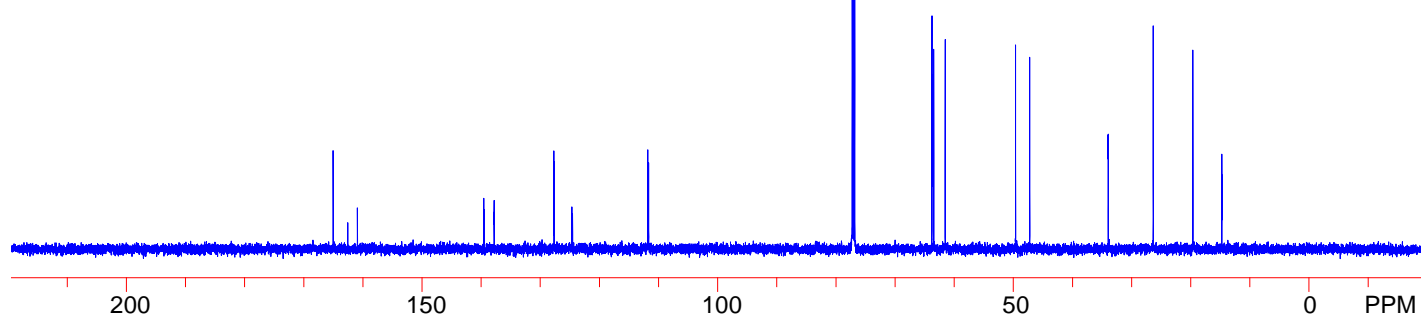

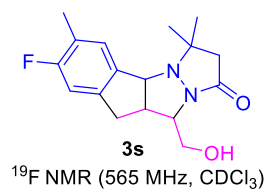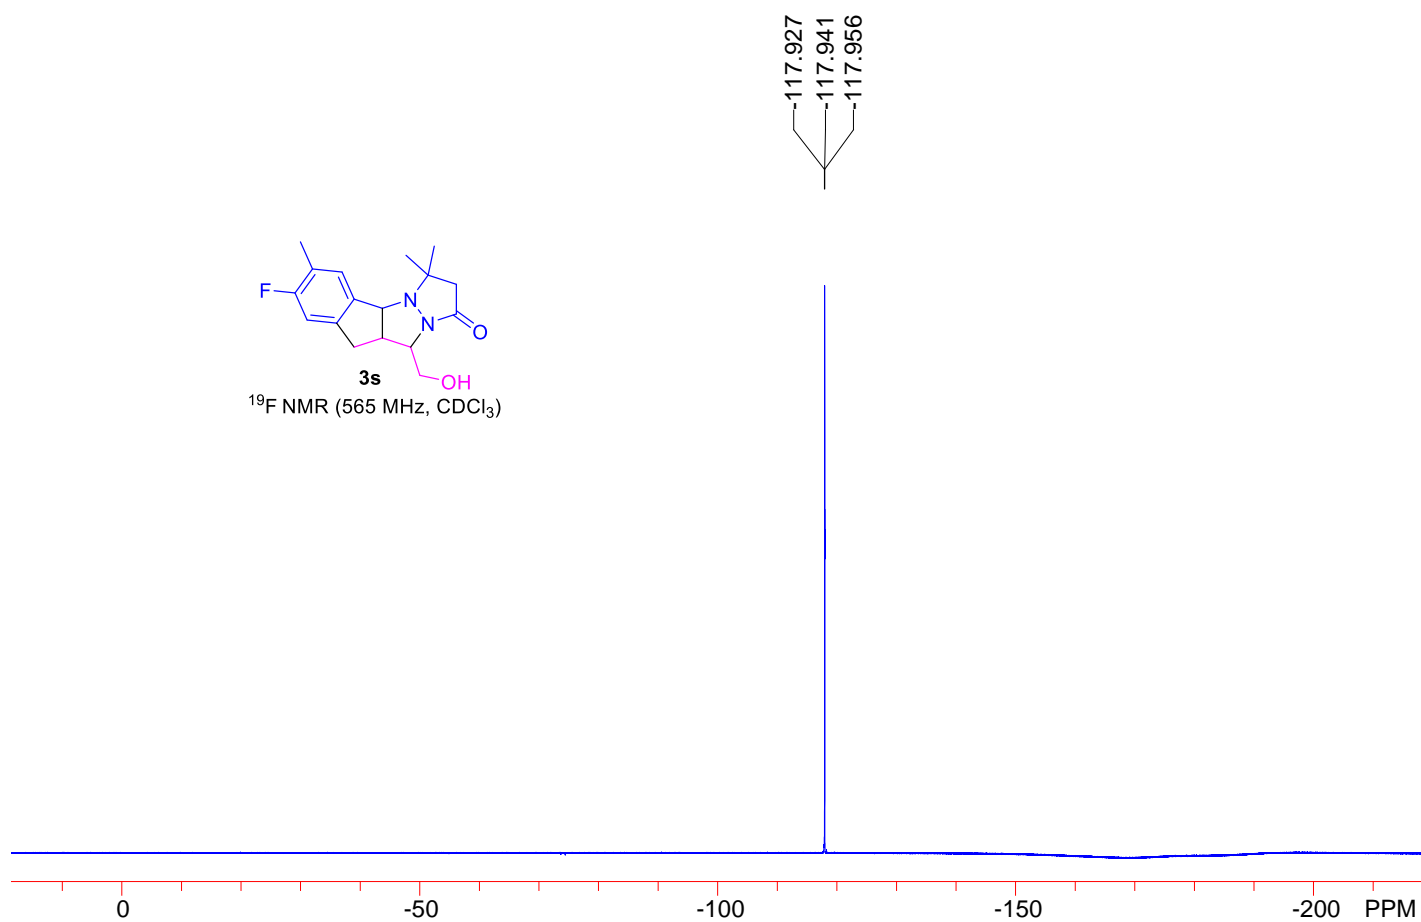

7.318  
7.308  
7.303  
7.292  
7.283  
7.277  
7.274  
7.264  
7.247  
7.243  
7.233  
5.427  
5.414  
4.348  
4.334  
4.036  
4.019  
4.002  
3.929  
3.913  
3.895  
3.456  
3.444  
3.434  
3.423  
3.412  
3.386  
3.371  
3.368  
3.350  
3.172  
3.159  
3.145  
3.131  
3.060  
3.056  
3.046  
3.042  
3.028  
3.018  
3.014  
2.905  
2.901  
2.877  
2.874  
2.757  
2.745  
2.731  
2.719  
2.646  
2.643  
2.624  
2.617  
2.596  
1.503  
1.493

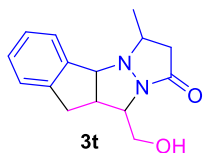

$^1\text{H NMR}$  (600 MHz,  $\text{CDCl}_3$ )

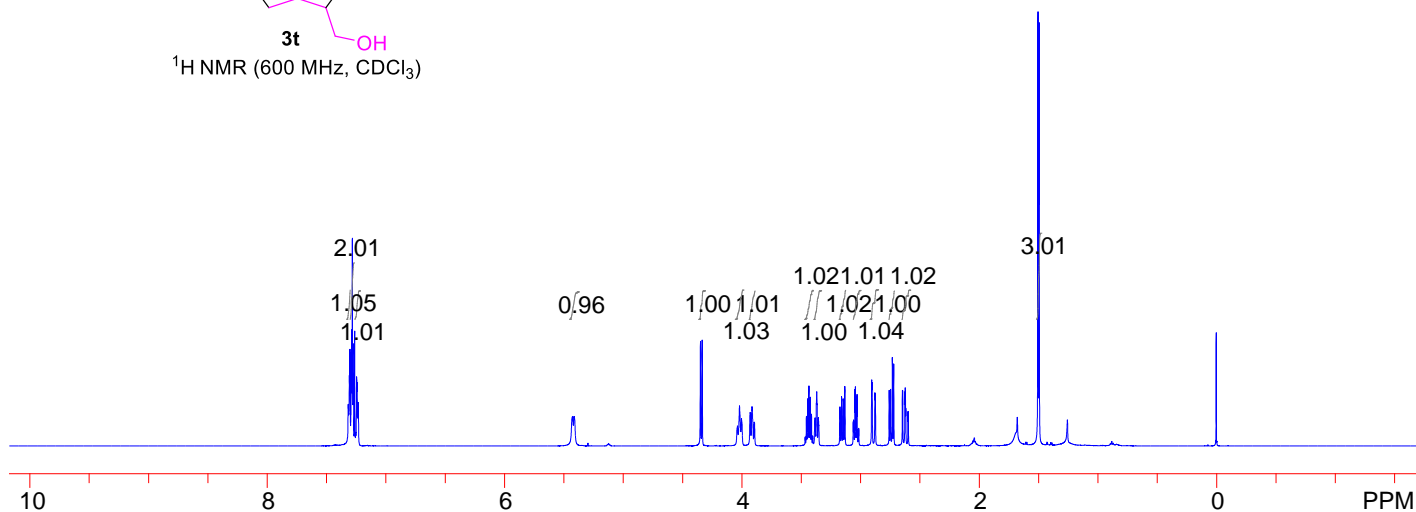

164.753  
141.251  
141.237  
128.797  
127.587  
125.574  
125.421  
77.266  
77.054  
76.843  
73.401  
64.250  
63.229  
61.647  
46.808  
43.213  
34.791  
18.742

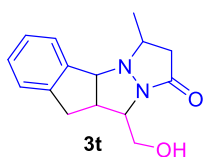

$^{13}\text{C}\{^1\text{H}\}$  (150 MHz,  $\text{CDCl}_3$ )

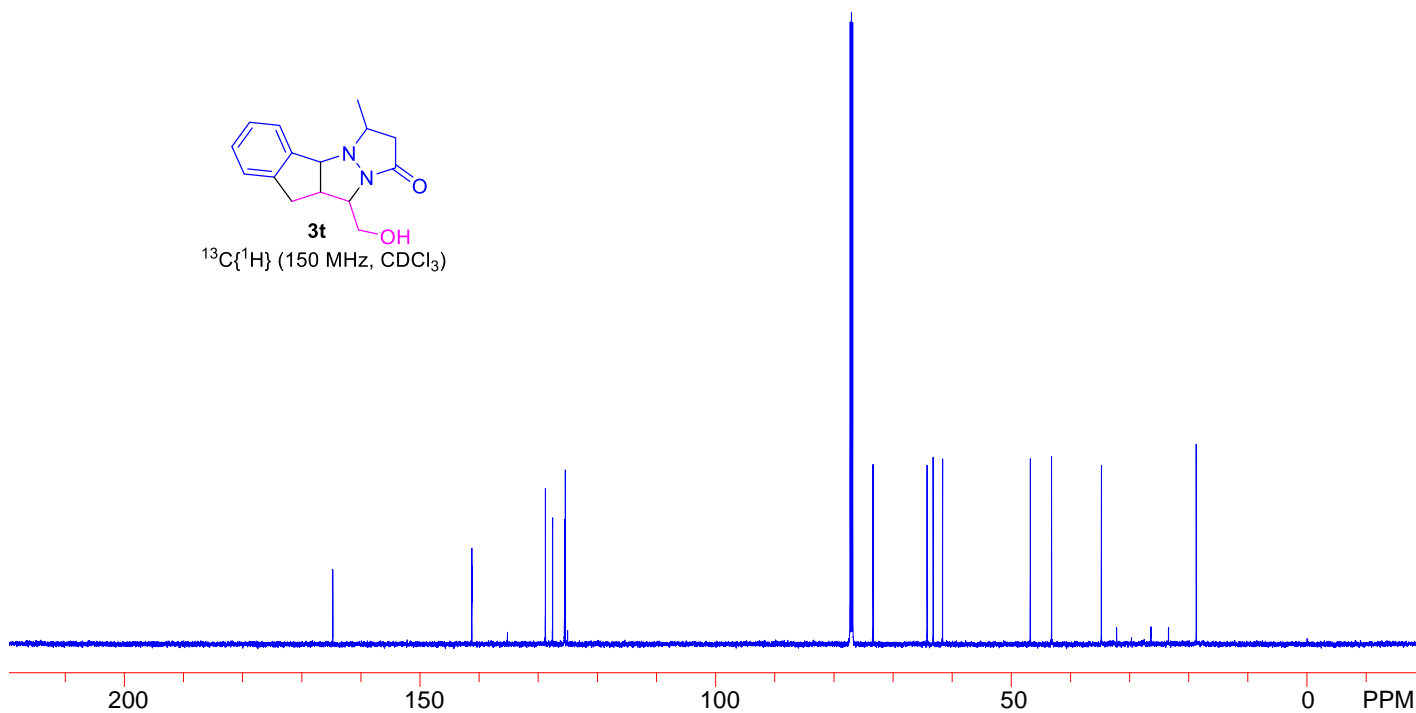

7.307  
7.298  
7.290  
7.282  
7.275  
7.263  
7.243  
7.238  
7.230  
5.391  
5.385  
5.374  
5.367  
4.370  
4.355  
4.049  
4.028  
4.007  
3.931  
3.910  
3.904  
3.889  
3.368  
3.333  
3.320  
3.160  
3.147  
3.133  
3.120  
3.042  
3.024  
3.013  
2.999  
2.996  
2.886  
2.859  
2.751  
2.739  
2.724  
2.713  
2.626  
2.603  
2.579  
1.960  
1.936  
1.921  
1.904  
1.763  
1.746  
1.716  
1.700  
1.492  
1.449  
1.422  
1.371  
1.040  
1.028  
1.016

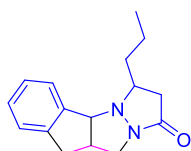

**3u**  
<sup>1</sup>H NMR (600 MHz, CDCl<sub>3</sub>)

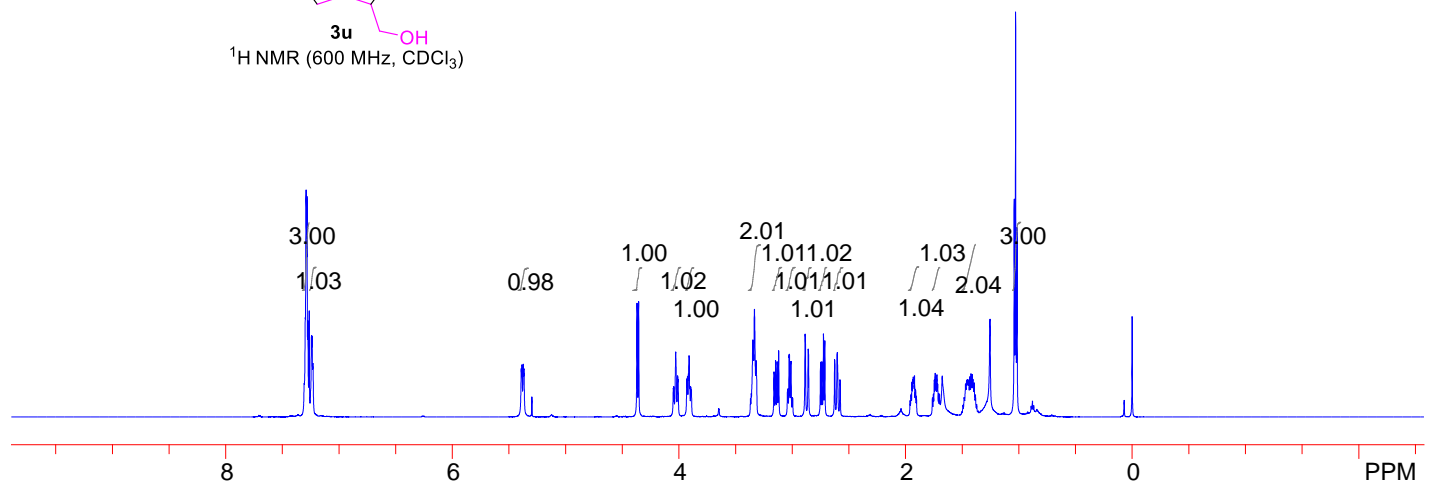

164.986  
141.397  
141.200  
128.760  
127.565  
125.559  
125.443  
77.258  
77.047  
76.836  
73.474  
67.568  
64.097  
61.464  
46.575  
41.026  
35.666  
34.601  
19.238  
14.214

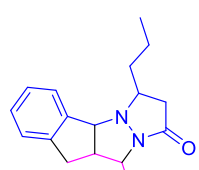

**3u**  
<sup>13</sup>C{<sup>1</sup>H} (150 MHz, CDCl<sub>3</sub>)

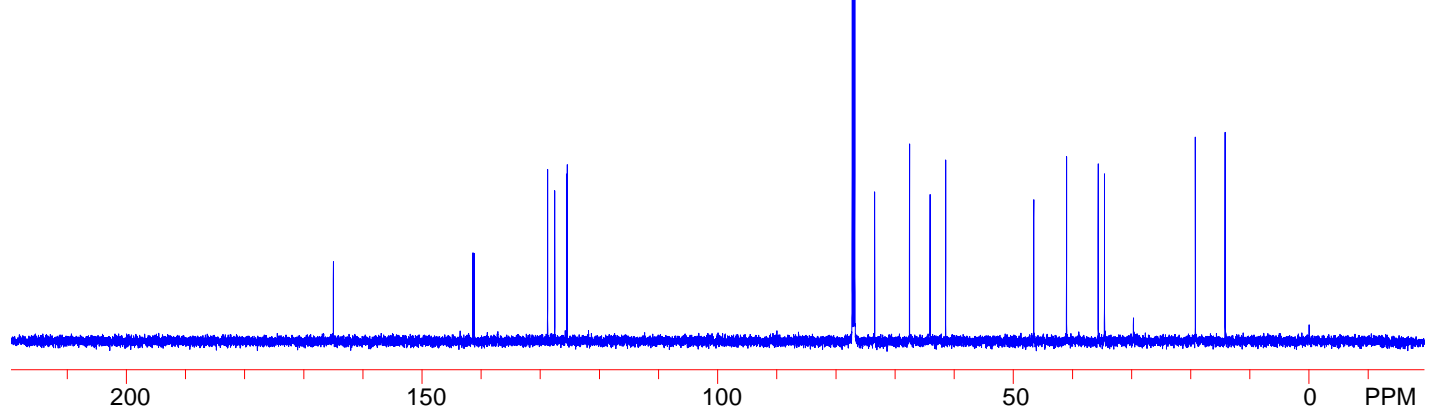

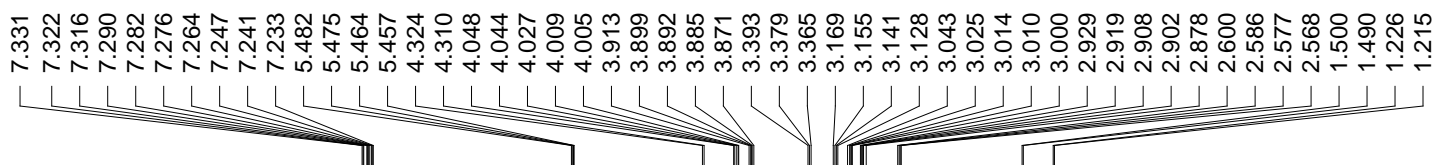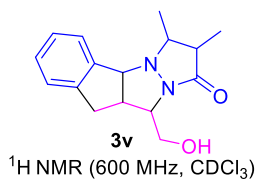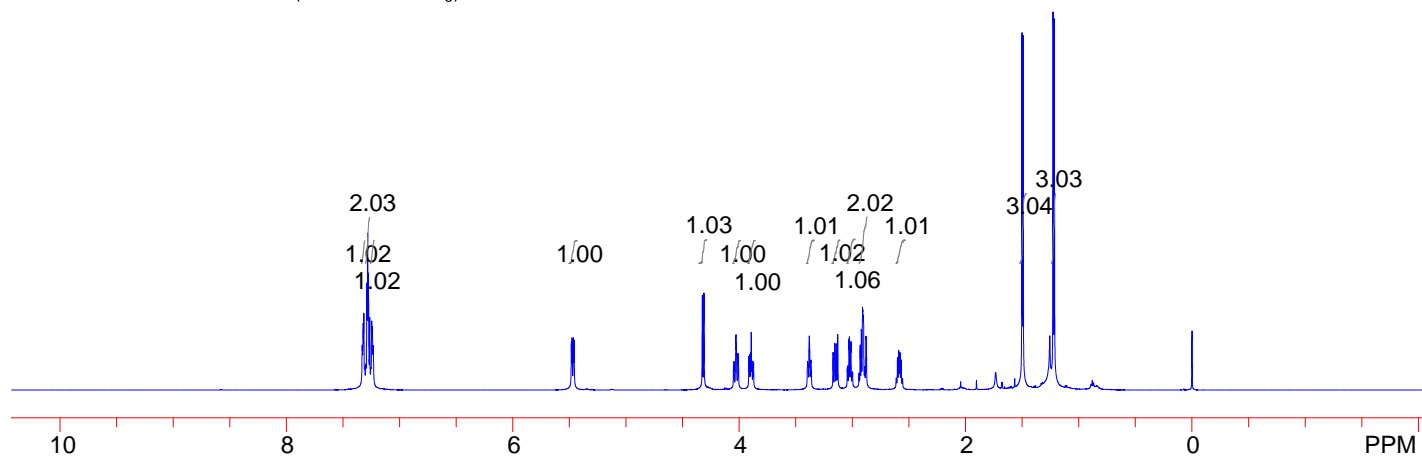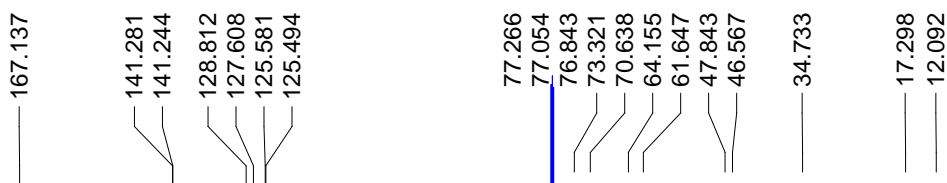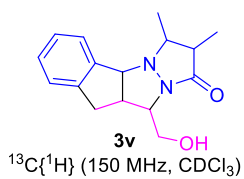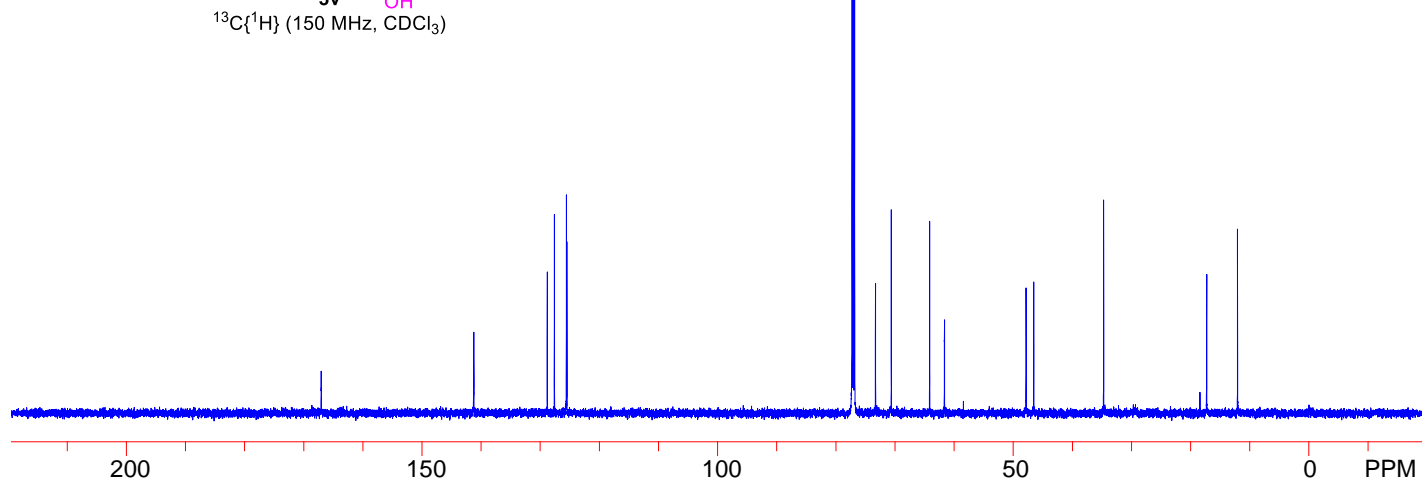

## V. Copies of NMR spectra of 5a-5u

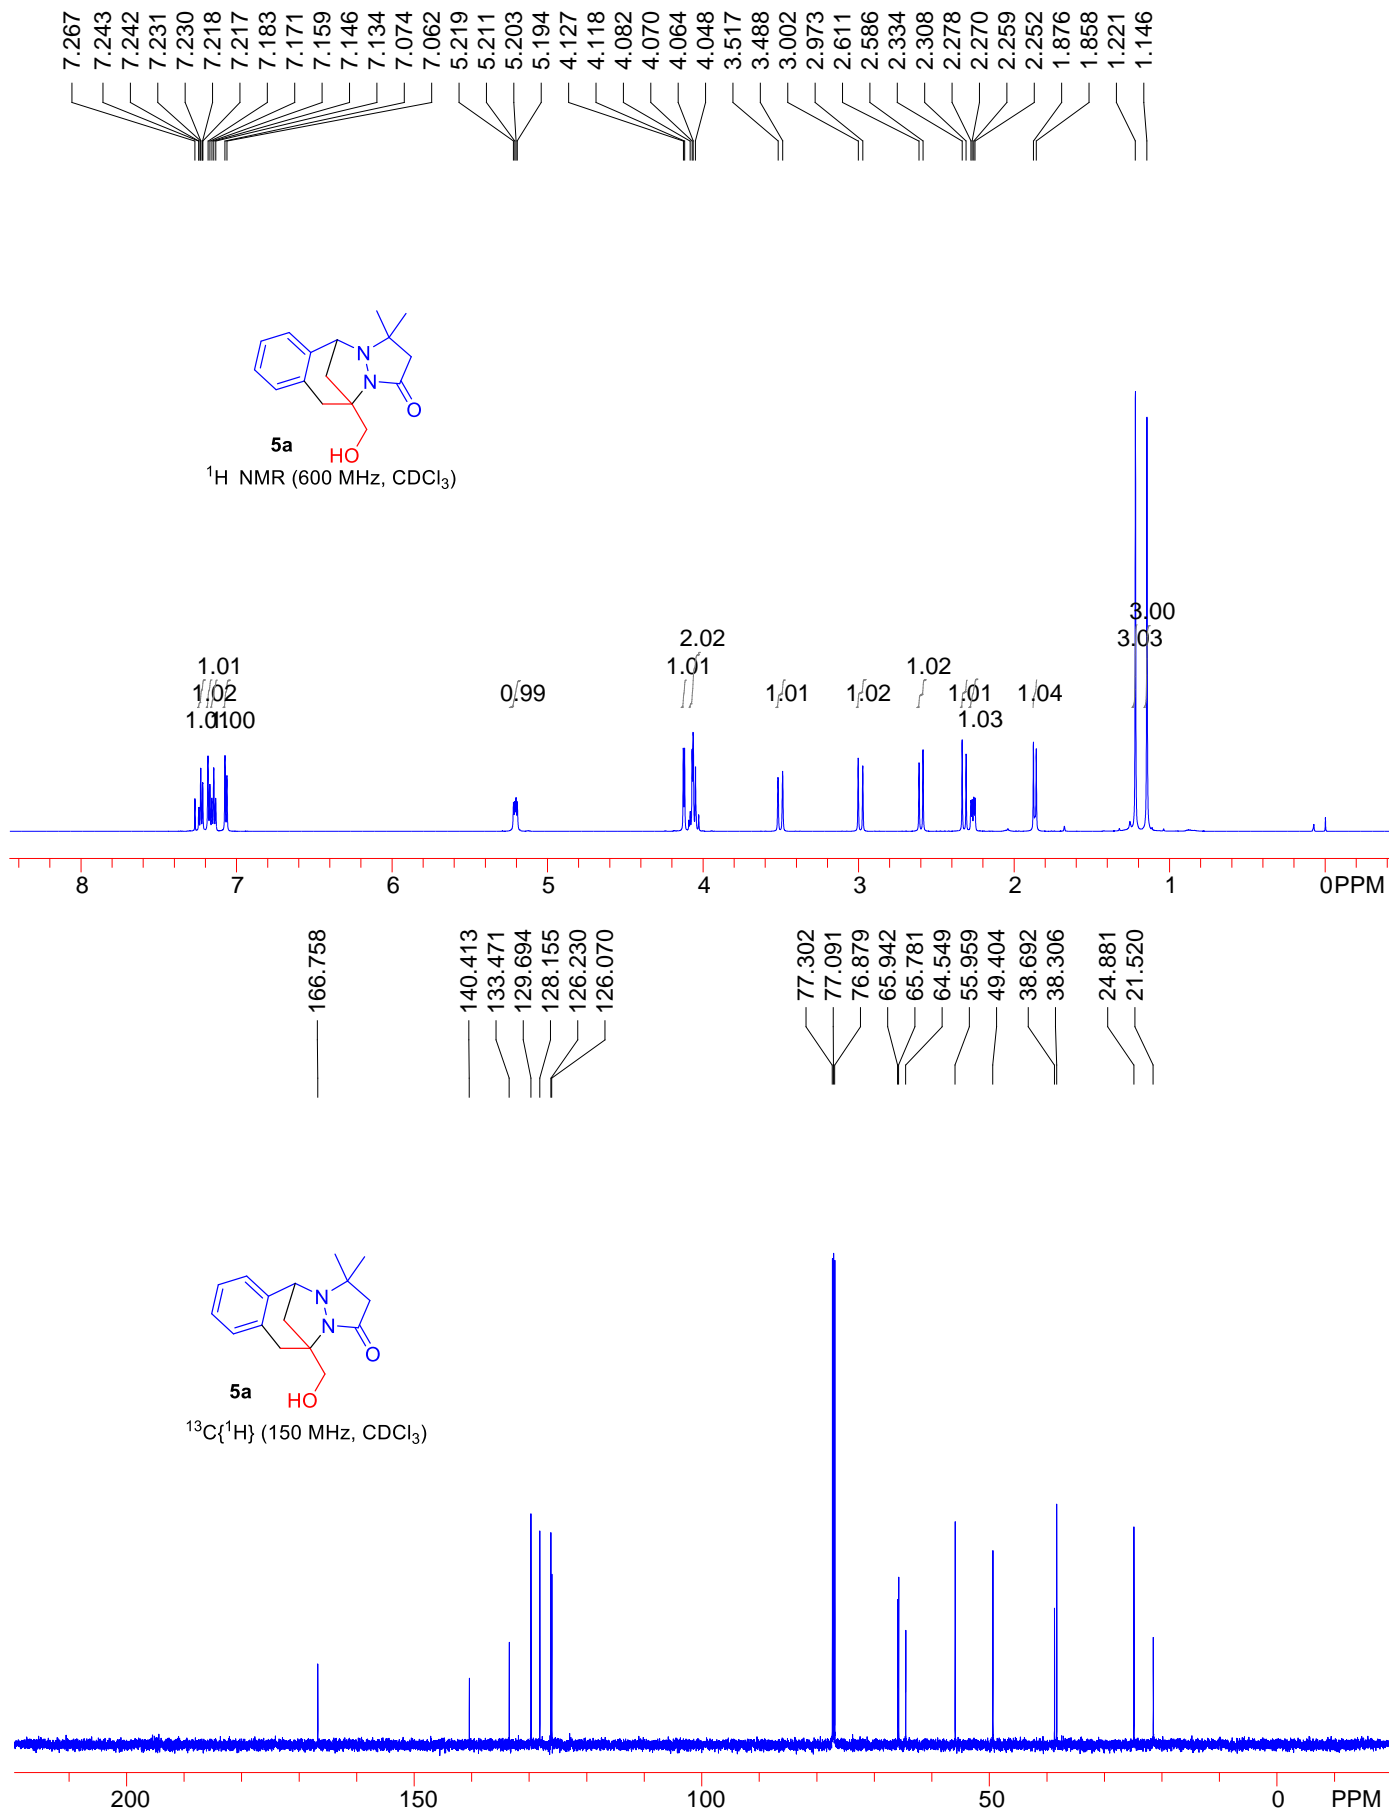



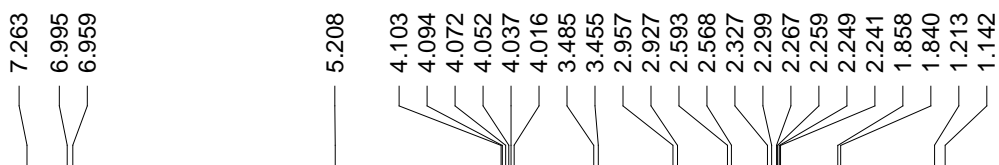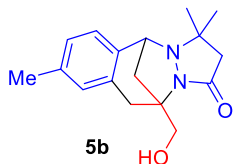

$^1\text{H}$  NMR (600 MHz,  $\text{CDCl}_3$ )

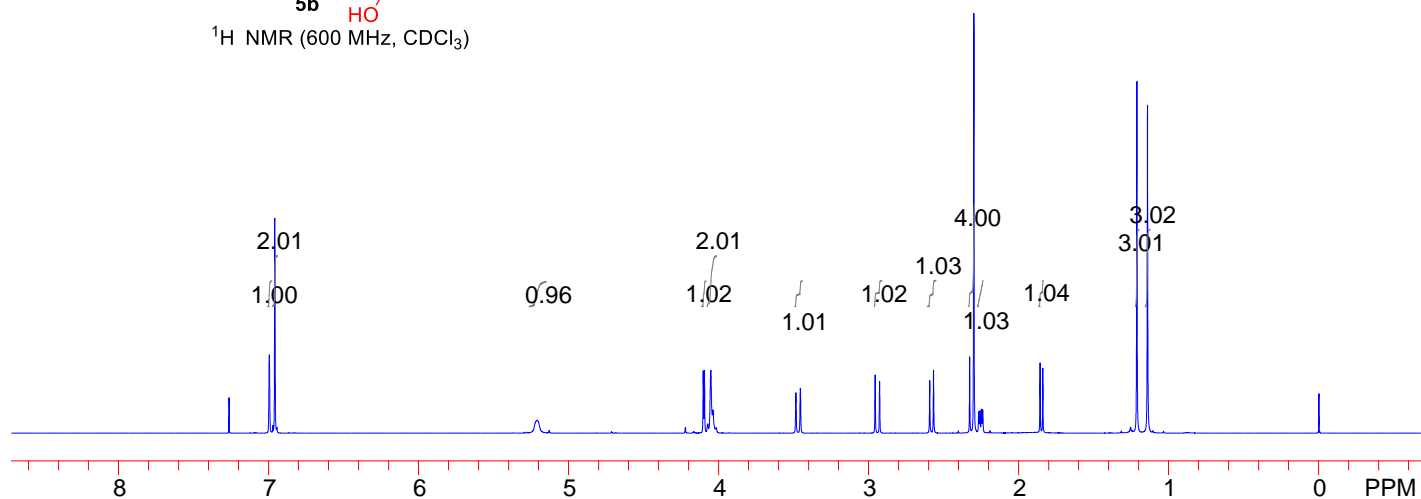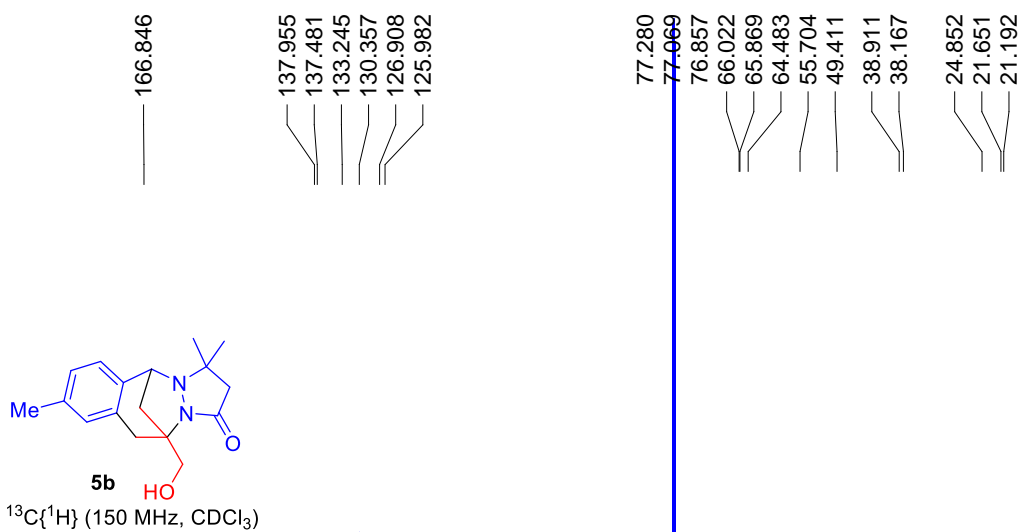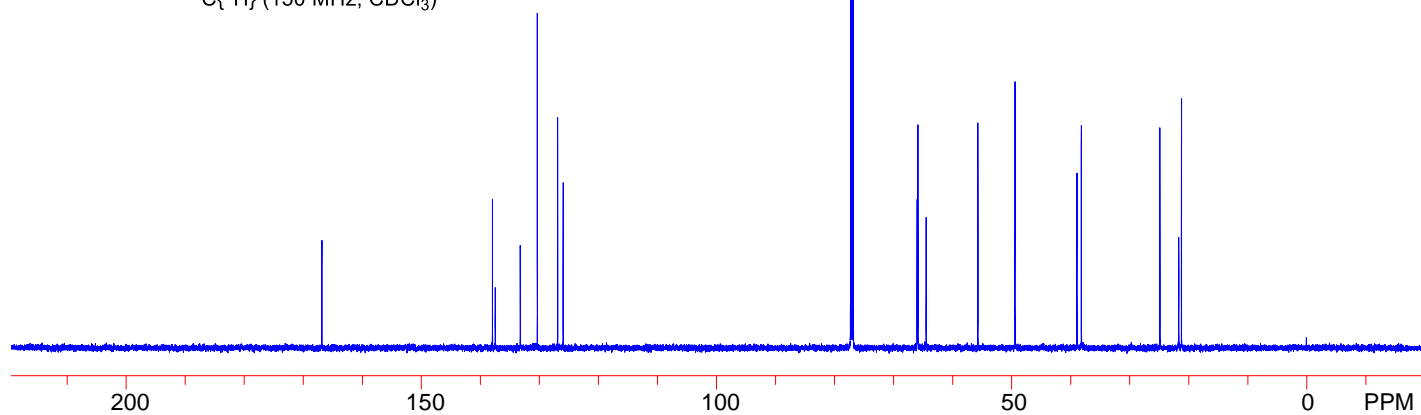



7.264  
6.995  
6.982  
6.719  
6.697  
6.694  
6.683  
6.680

5.232  
4.104  
4.096  
4.070  
4.051  
4.041  
4.025  
4.005  
3.772  
3.520  
3.491  
2.978  
2.948  
2.574  
2.548  
2.359  
2.334  
2.281  
2.273  
2.263  
2.255  
1.861  
1.843  
1.218  
1.110

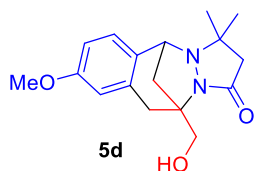

$^1\text{H}$  NMR (600 MHz,  $\text{CDCl}_3$ )

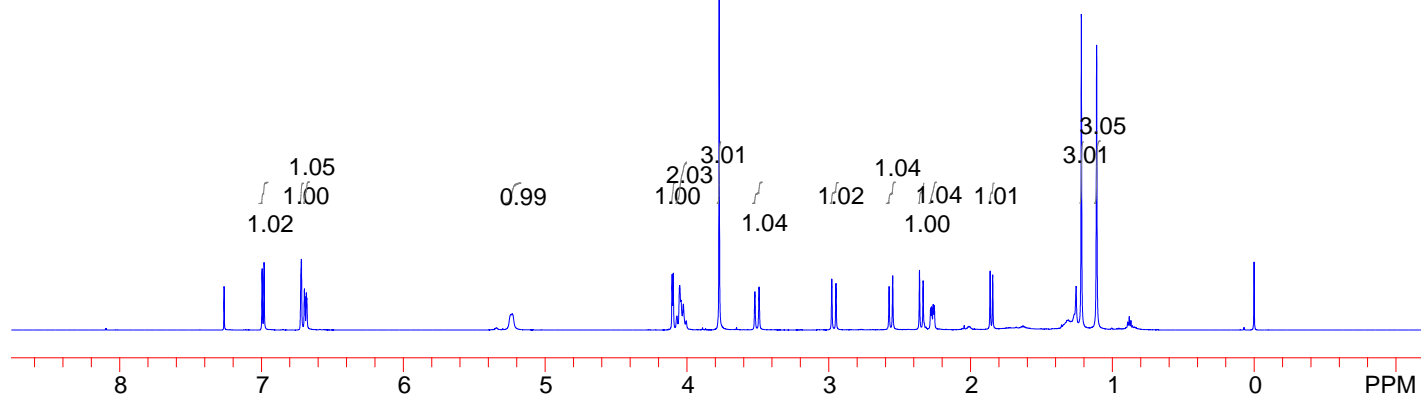

166.781  
159.500

134.864  
132.632  
127.258

114.791  
111.859

77.363  
77.045  
76.727  
65.951  
65.749  
64.261  
55.464  
55.312  
49.512  
39.292  
38.454  
24.731  
22.008

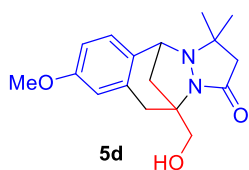

$^{13}\text{C}\{^1\text{H}\}$  (150 MHz,  $\text{CDCl}_3$ )

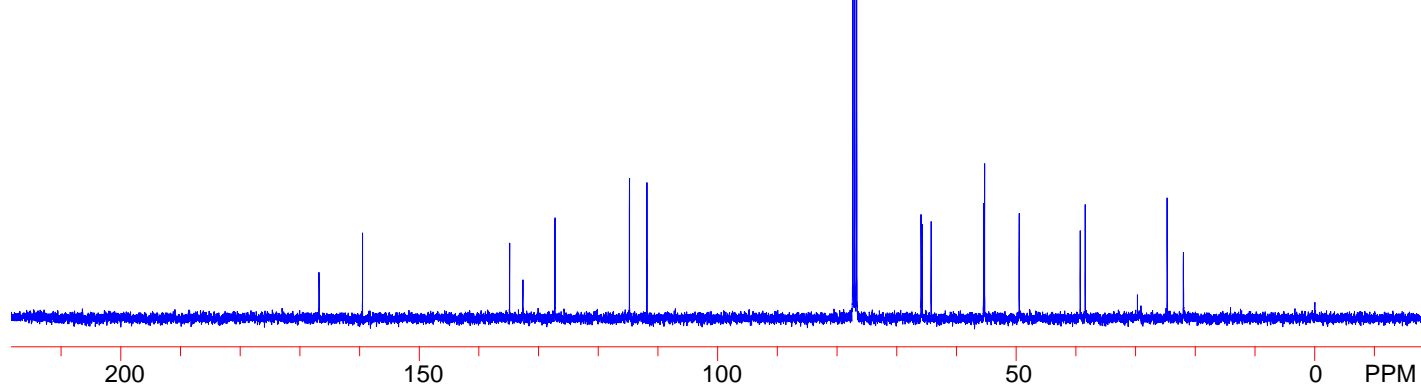

7.265  
7.050  
7.040  
7.036  
7.027  
6.897  
6.881  
6.861  
6.857  
6.847  
6.843  
6.833  
6.829  
5.159  
4.134  
4.126  
4.087  
4.067  
4.048  
3.506  
3.476  
2.989  
2.959  
2.621  
2.596  
2.341  
2.316  
2.281  
2.273  
2.263  
2.255  
1.850  
1.831  
1.217  
1.155

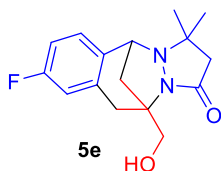

$^1\text{H NMR}$  (600 MHz,  $\text{CDCl}_3$ )

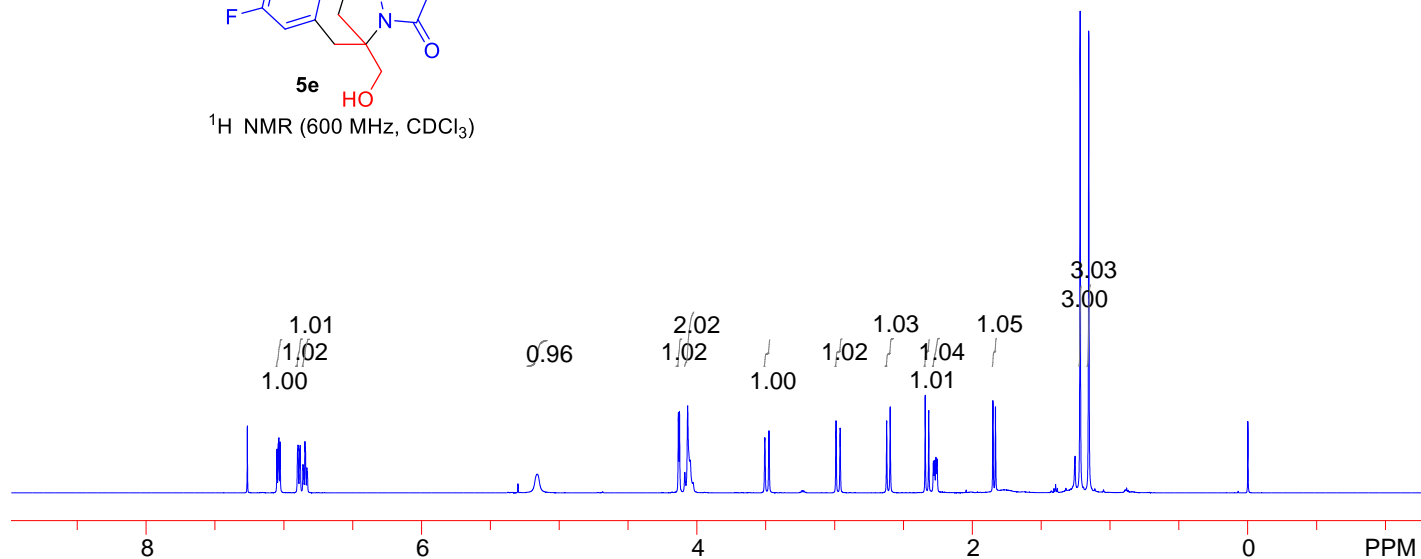

166.867  
163.265  
161.632  
136.359  
135.899  
135.848  
127.484  
127.426  
116.532  
116.386  
113.192  
113.054  
77.251  
77.040  
76.828  
65.613  
65.592  
64.593  
55.310  
49.331  
38.758  
38.488  
24.954  
21.483

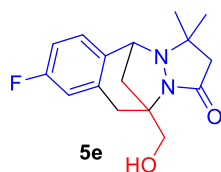

$^{13}\text{C}\{^1\text{H}\}$  (150 MHz,  $\text{CDCl}_3$ )

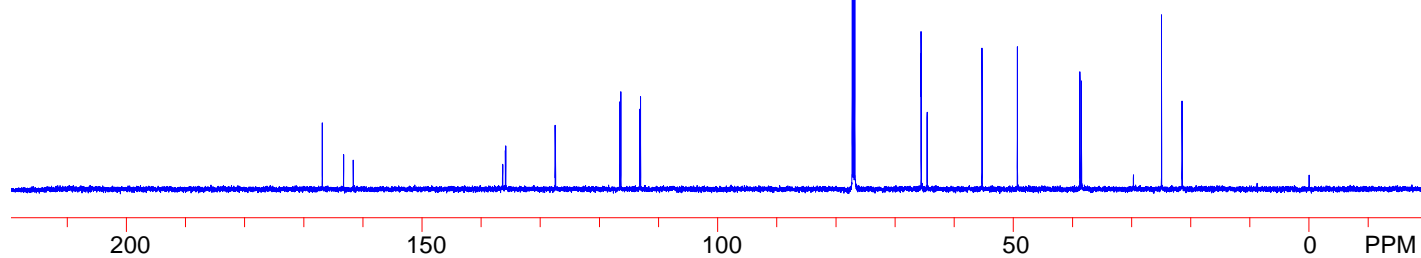

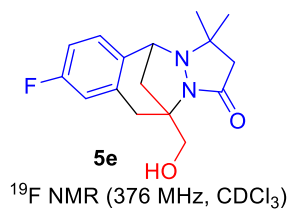

114.039  
114.061  
114.076  
114.098

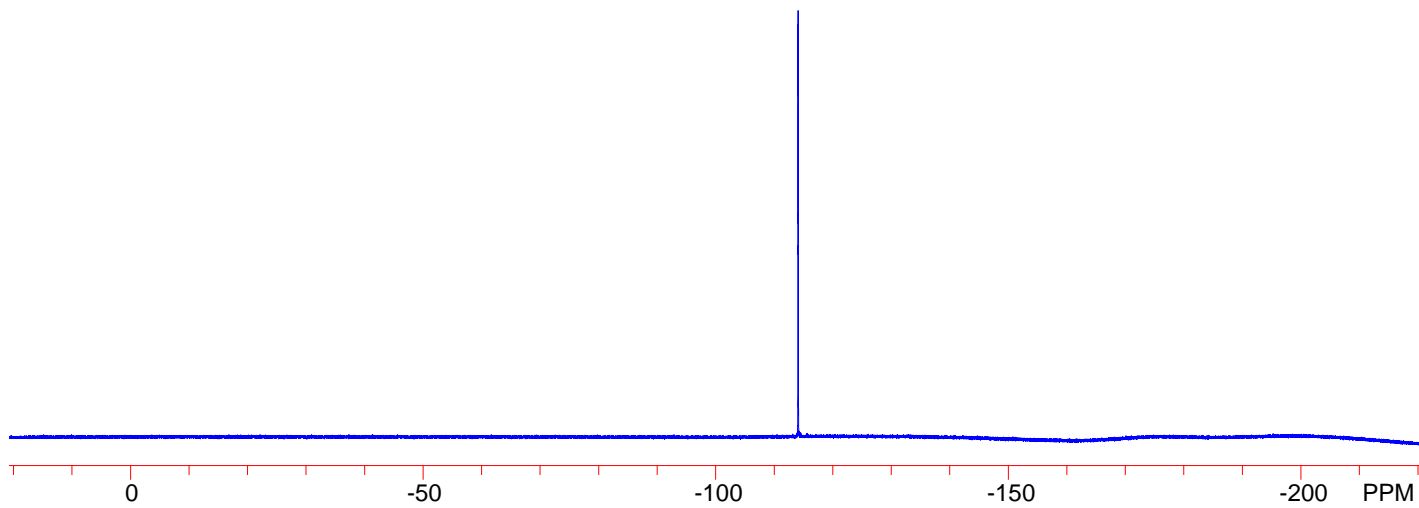

7.242  
7.233  
7.220  
7.192  
7.189  
7.179  
7.175

5.158

4.398  
4.391

3.939  
3.149

3.120  
3.017

2.988  
2.505

2.502  
2.499

2.376  
2.351

2.201  
2.193

2.182  
2.175

2.159  
2.133

1.809  
1.791

1.138  
1.106

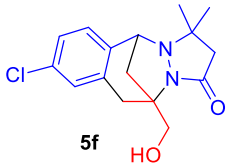

<sup>1</sup>H NMR (600 MHz, DMSO-d<sub>6</sub>)

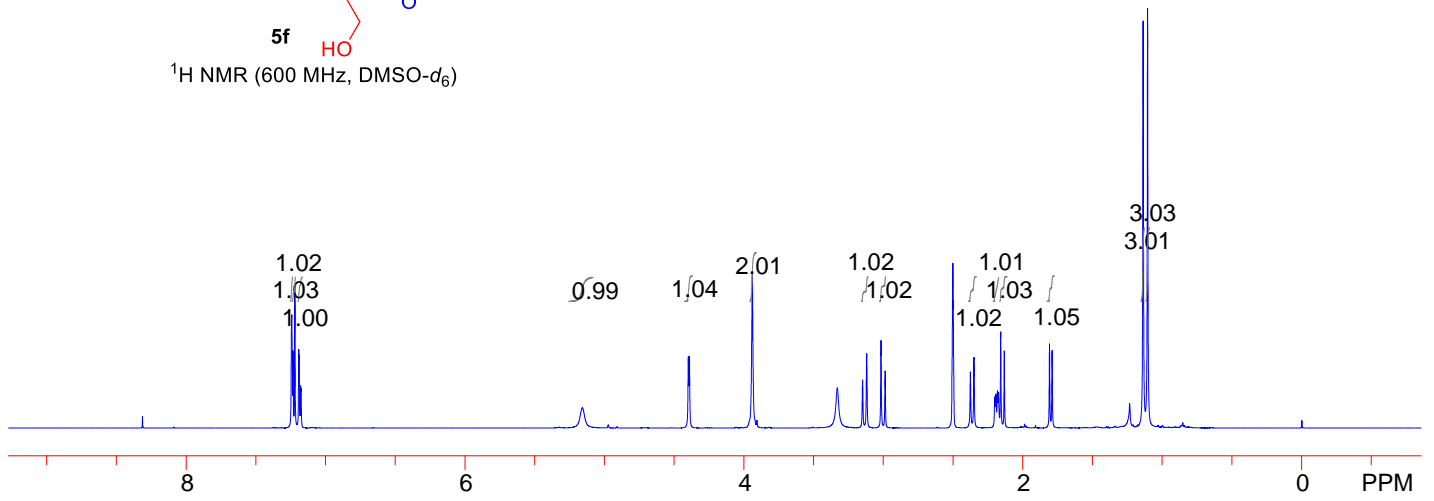

167.392

140.406  
137.029

132.158  
129.329

128.476  
126.099

65.555  
64.177

63.754  
54.727

48.850  
40.420

40.282  
40.143

40.005  
39.866

39.728  
39.582

38.605  
37.999

25.100  
21.863

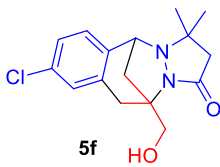

<sup>13</sup>C{<sup>1</sup>H} (150 MHz, DMSO-d<sub>6</sub>)

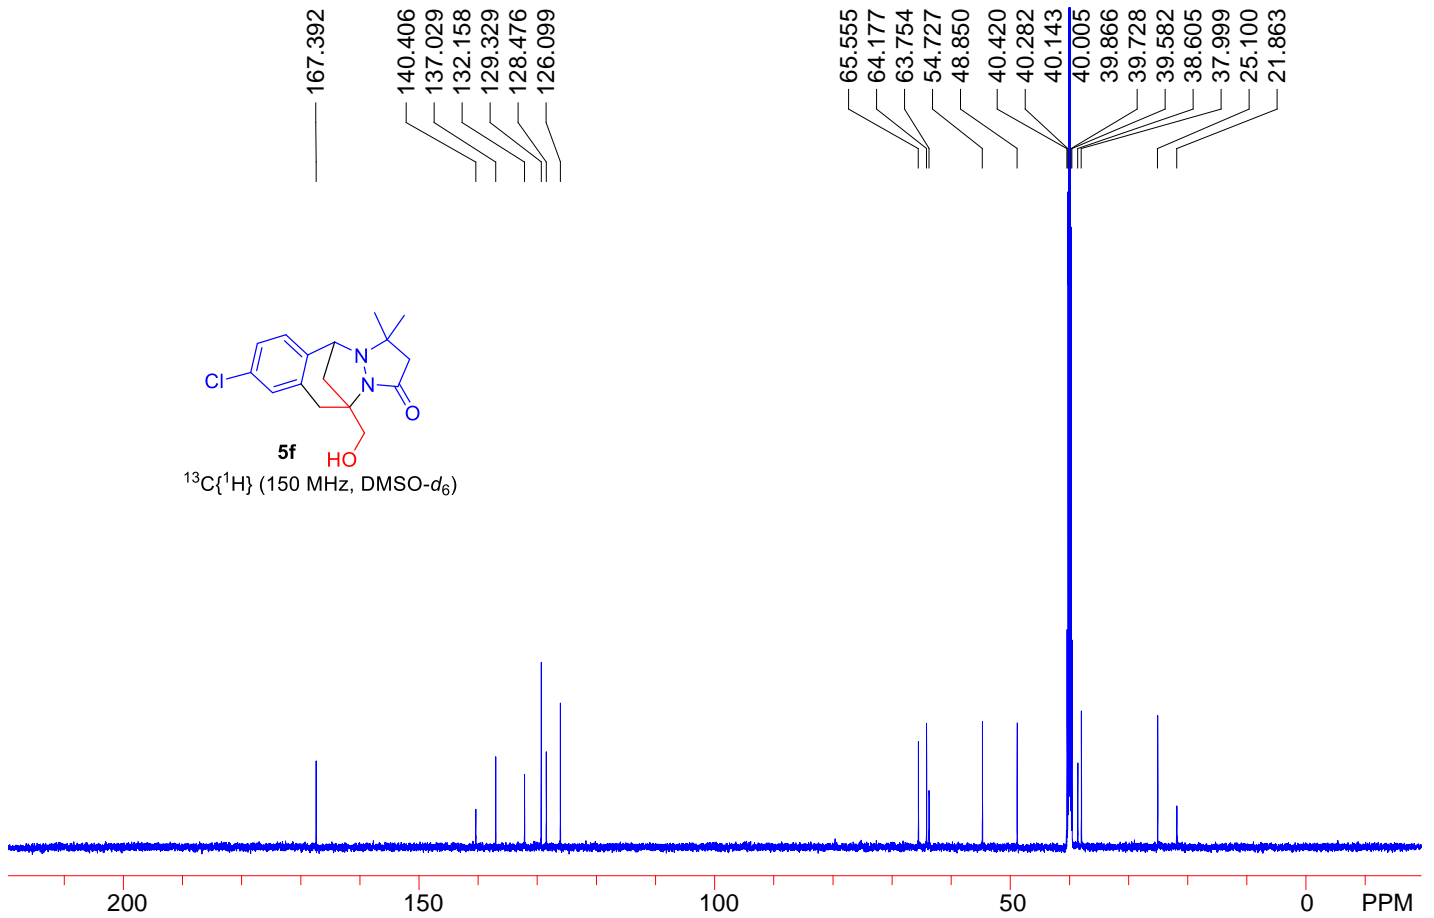

7.325  
7.296  
7.291  
7.276  
7.269  
6.962  
6.942

5.131  
4.115  
4.103  
4.060  
3.489  
3.444  
2.977  
2.932  
2.633  
2.595  
2.330  
2.292  
2.277  
2.275  
2.265  
2.263  
2.249  
2.247  
2.237  
2.235  
1.838  
1.811  
1.209  
1.172

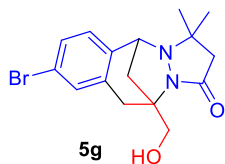

$^1\text{H}$  NMR (400 MHz,  $\text{CDCl}_3$ )

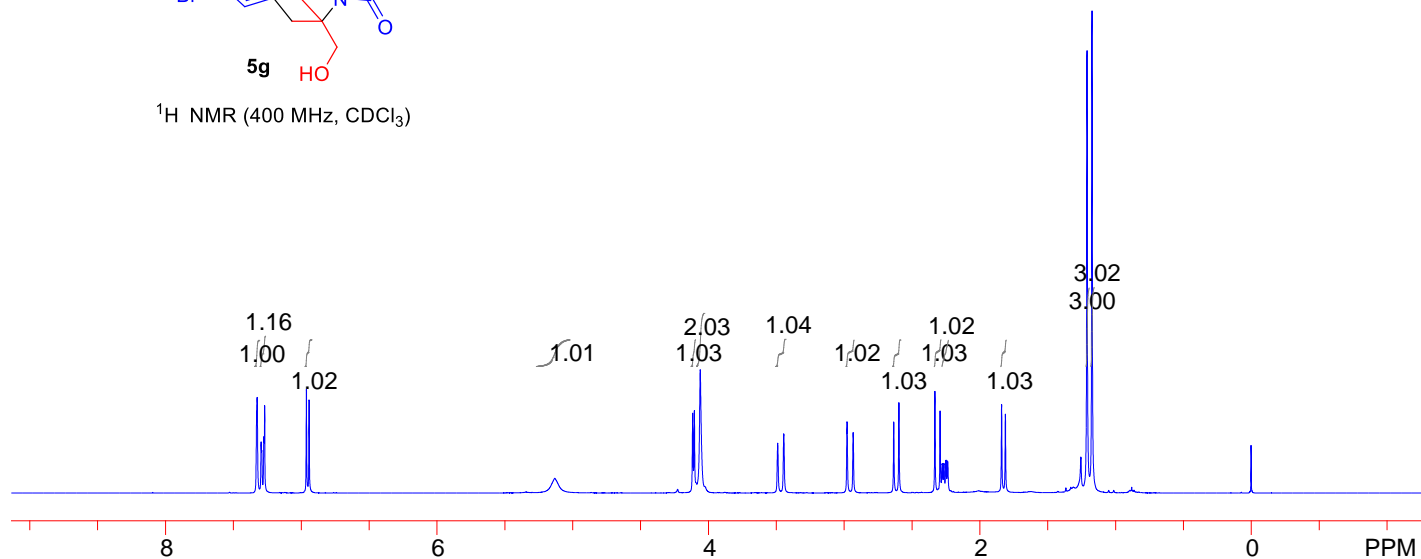

166.889  
139.515  
135.860  
132.624  
129.360  
127.475  
121.812  
77.385  
77.067  
76.749  
65.691  
65.482  
64.723  
55.406  
49.230  
38.367  
38.172  
25.077  
21.300

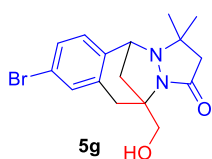

$^{13}\text{C}\{^1\text{H}\}$  (100 MHz,  $\text{CDCl}_3$ )

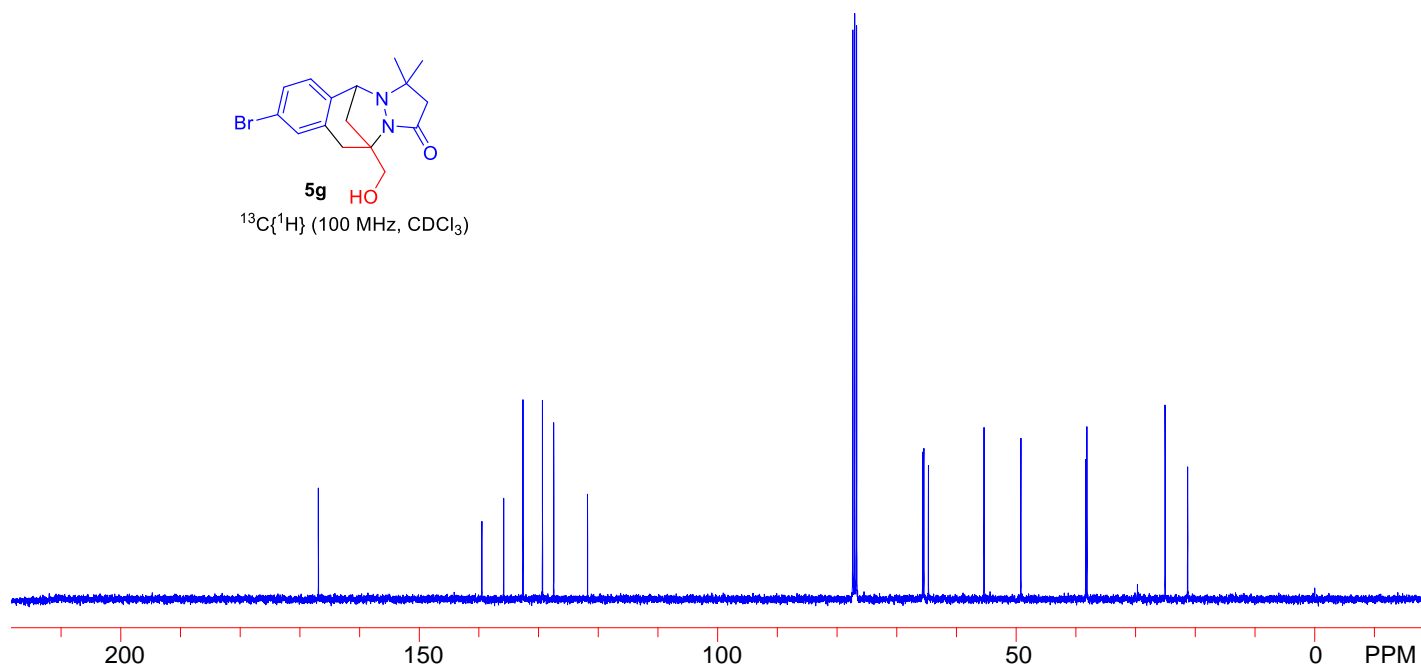

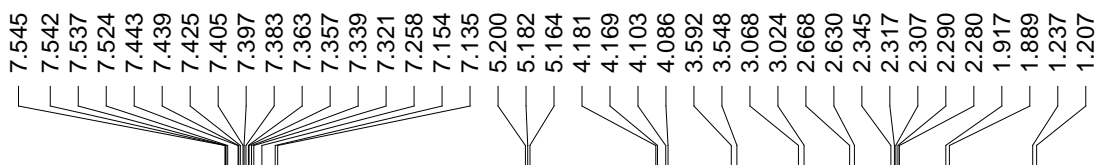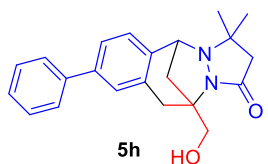

$^1\text{H NMR}$  (400 MHz,  $\text{CDCl}_3$ )

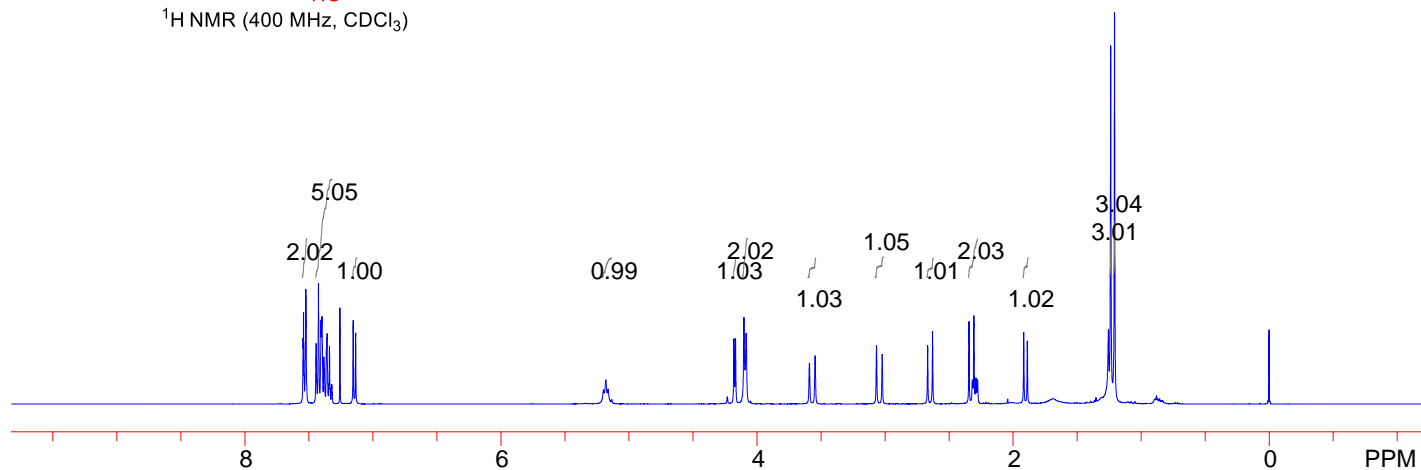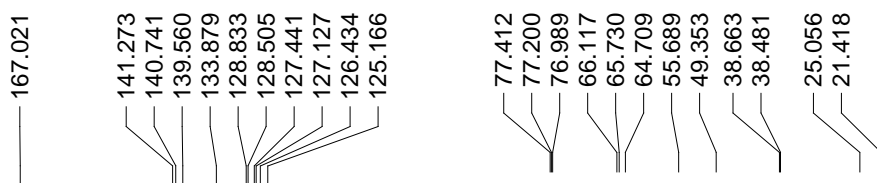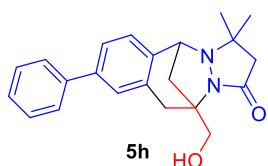

$^{13}\text{C}\{^1\text{H}\}$  (150 MHz,  $\text{CDCl}_3$ )

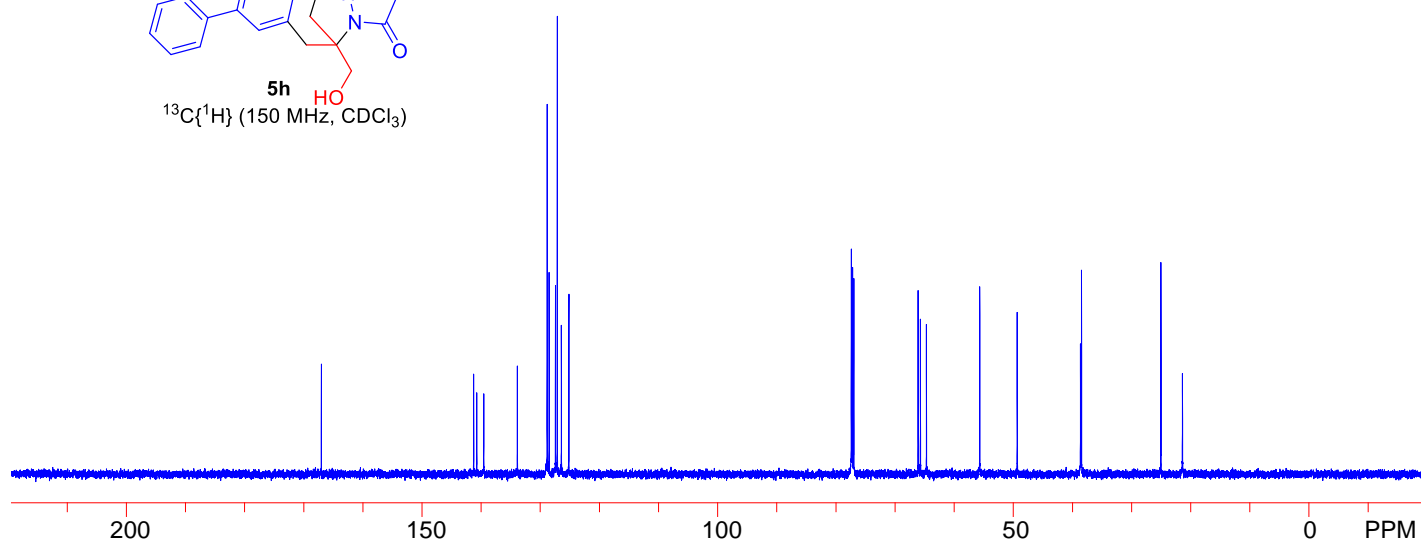



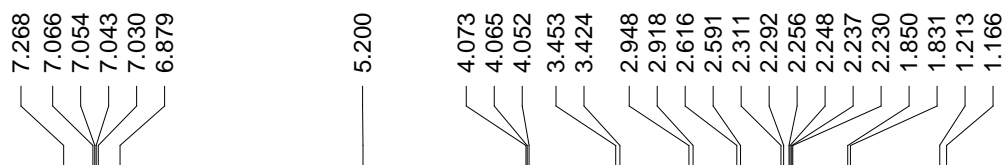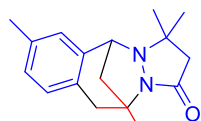

5i

$^1\text{H}$  NMR (600 MHz,  $\text{CDCl}_3$ )

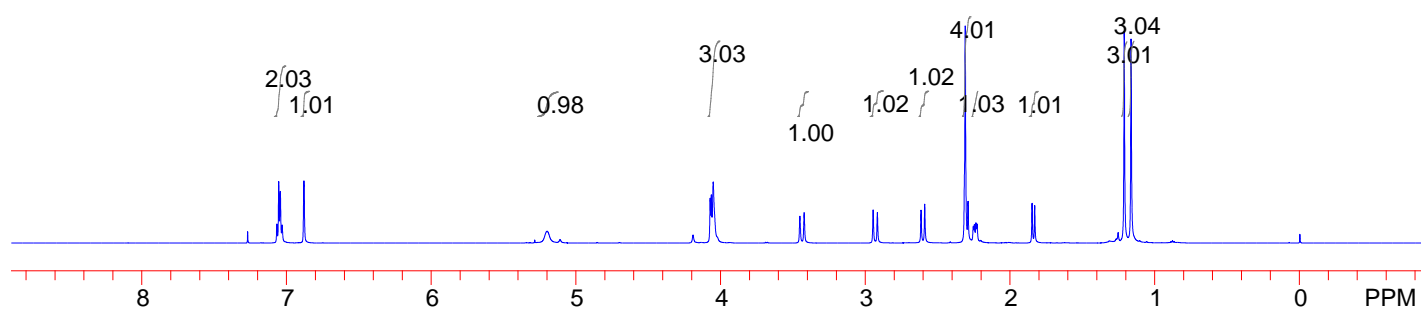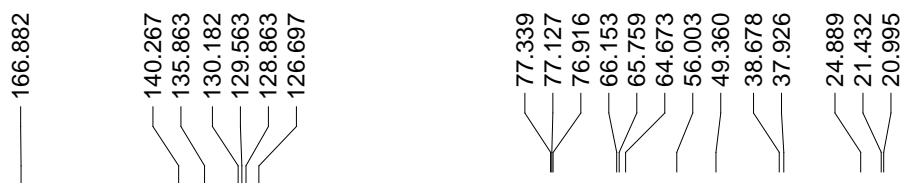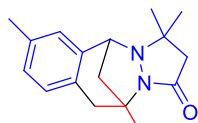

5i

$^{13}\text{C}\{^1\text{H}\}$  (150 MHz,  $\text{CDCl}_3$ )

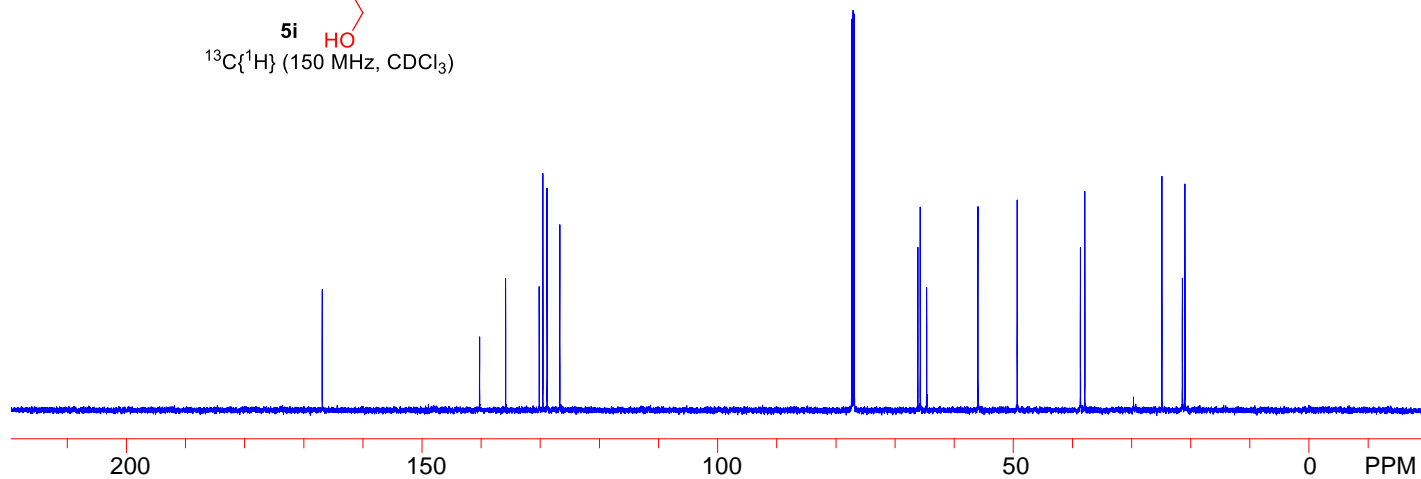

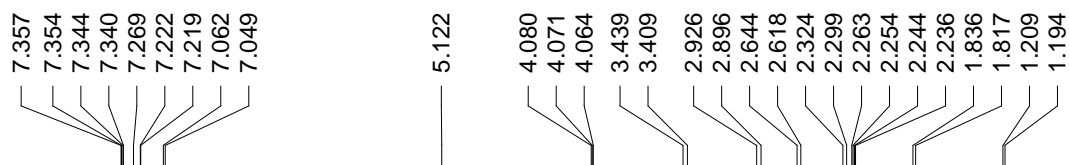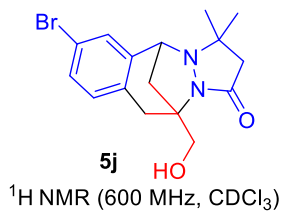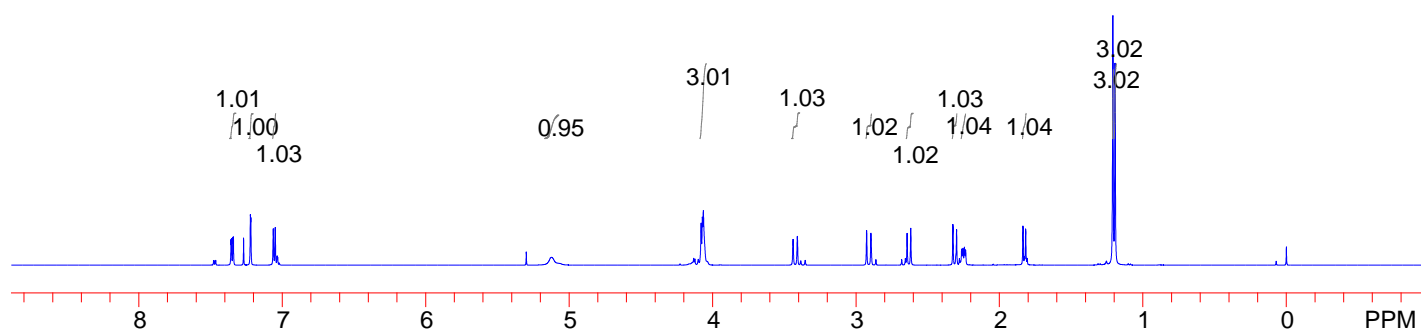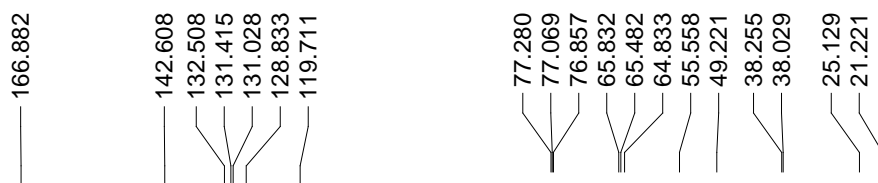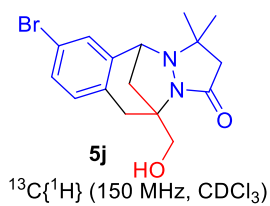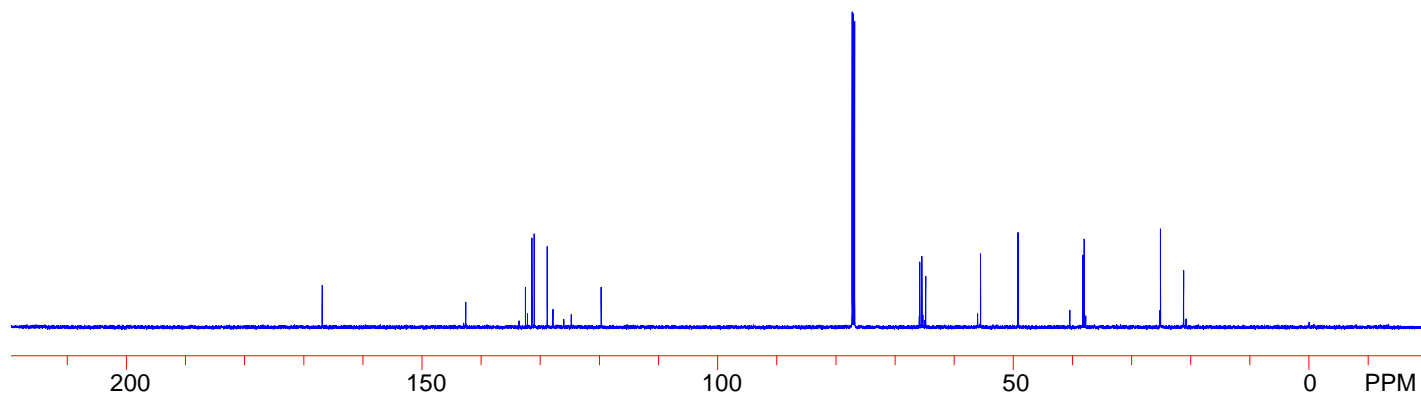

7.497  
7.484  
7.322  
7.310  
7.297  
7.266

5.134  
5.125  
5.118  
5.109  
4.190  
4.182  
4.099  
4.095  
4.091  
4.079  
3.551  
3.520  
3.040  
3.010  
2.663  
2.637  
2.328  
2.302  
2.297  
2.285  
2.277  
1.859  
1.840  
1.225  
1.202

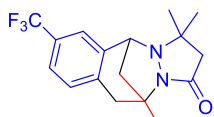

5k

<sup>1</sup>H NMR (600 MHz, CDCl<sub>3</sub>)

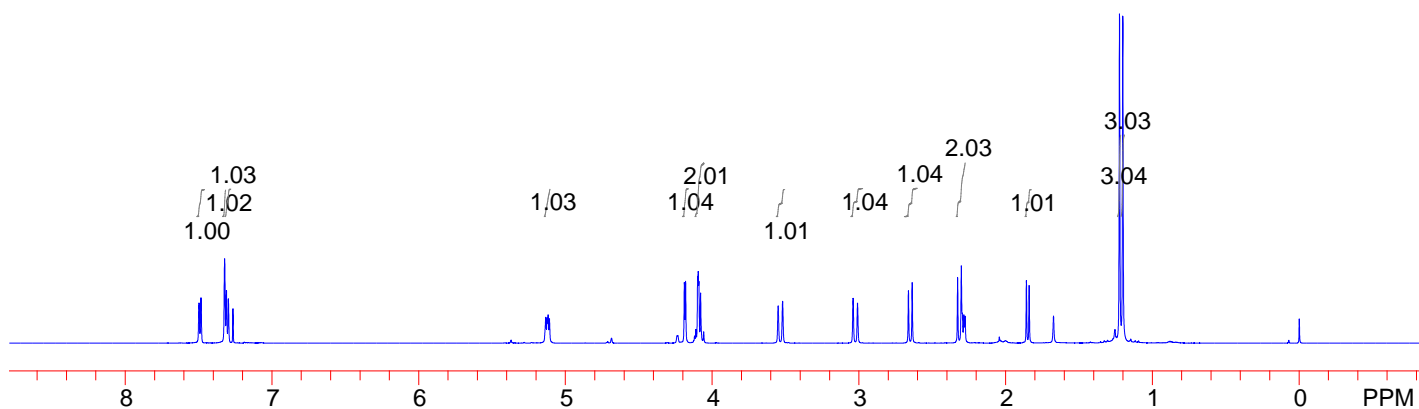

166.955  
141.404  
137.926  
130.190  
128.928  
128.717  
128.498  
128.287  
126.726  
124.925  
124.903  
124.874  
124.852  
124.830  
123.124  
122.672  
122.650  
122.621  
122.599  
121.323  
77.251  
77.040  
76.828  
65.767  
65.358  
64.913  
55.638  
49.163  
38.546  
38.204  
25.195  
21.075

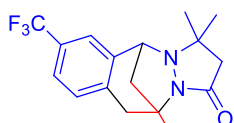

5k

<sup>13</sup>C{<sup>1</sup>H} (150 MHz, CDCl<sub>3</sub>)

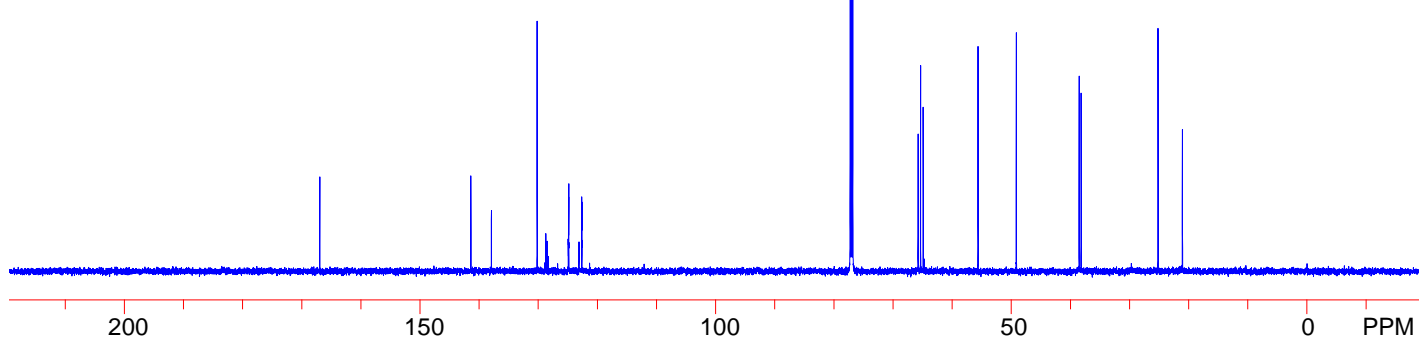

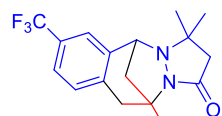

5k

<sup>19</sup>F NMR (565 MHz, CDCl<sub>3</sub>)

62.353

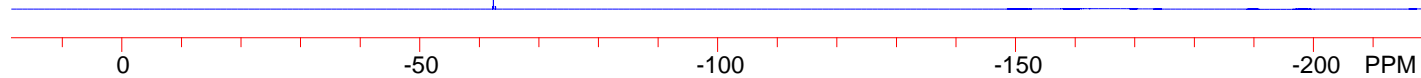

7.293  
7.291  
7.271  
7.213  
7.208  
7.193  
7.188  
7.143  
7.122  
7.102  
7.070  
7.065  
6.996  
6.978  
5.113  
4.146  
4.133  
4.120  
4.102  
4.084  
4.071  
3.467  
3.435  
3.423  
3.389  
2.956  
2.931  
2.911  
2.885  
2.684  
2.647  
2.612  
2.330  
2.313  
2.292  
2.275  
2.258  
2.244  
2.232  
1.844  
1.832  
1.816  
1.804  
1.211  
1.205  
1.192

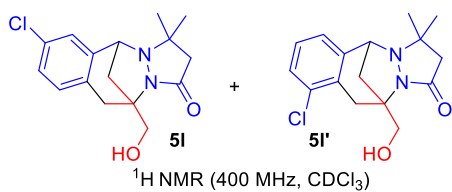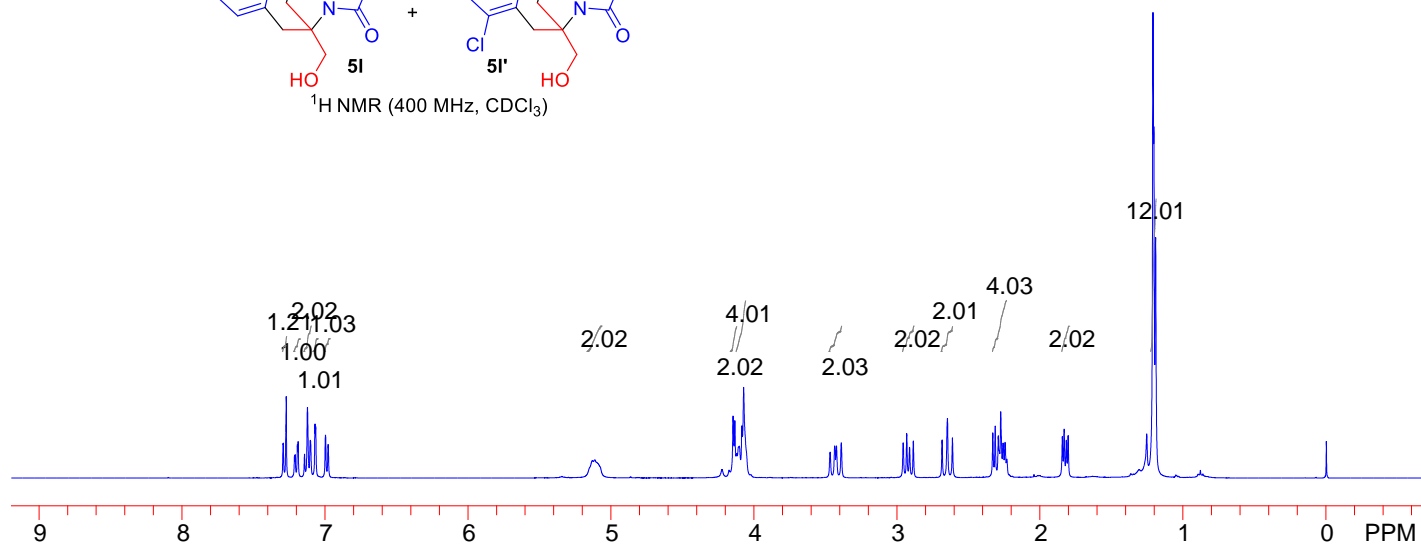

166.875  
166.846  
142.841  
142.258  
135.367  
131.940  
131.852  
131.714  
131.065  
128.841  
128.068  
127.579  
125.931  
124.079  
77.302  
77.091  
76.879  
65.869  
65.665  
65.475  
65.380  
64.943  
64.797  
55.828  
55.587  
49.229  
49.170  
38.276  
37.941  
37.839  
37.744  
25.195  
25.100  
21.206  
20.842

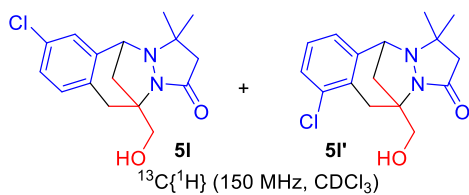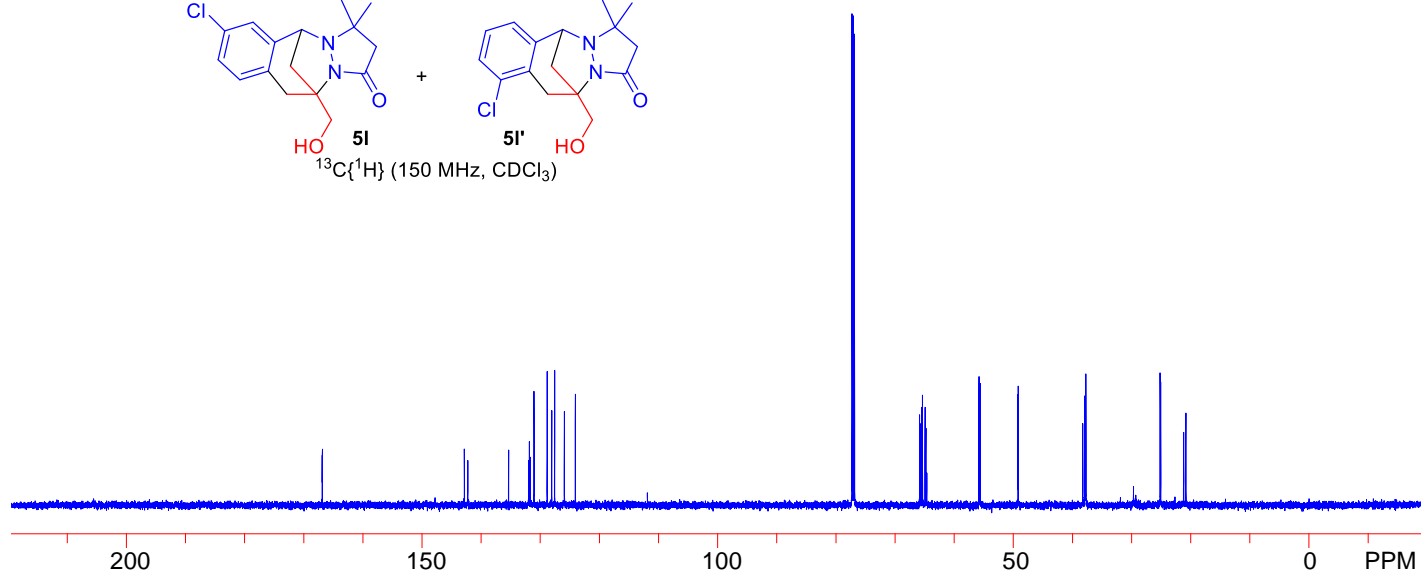

7.268  
7.168  
7.159  
7.155  
7.146  
7.142  
7.133  
6.962  
6.961  
6.947  
6.933  
6.932  
6.886  
6.874  
5.104  
5.095  
5.088  
5.079  
4.163  
4.161  
4.155  
4.152  
4.139  
4.122  
4.118  
4.101  
4.099  
4.090  
4.078  
4.070  
3.421  
3.391  
2.922  
2.891  
2.665  
2.640  
2.321  
2.296  
2.289  
2.287  
2.280  
2.279  
2.270  
2.269  
2.262  
2.260  
1.843  
1.825  
1.217  
1.192

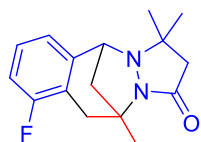

$^1\text{H NMR}$  (600 MHz,  $\text{CDCl}_3$ )

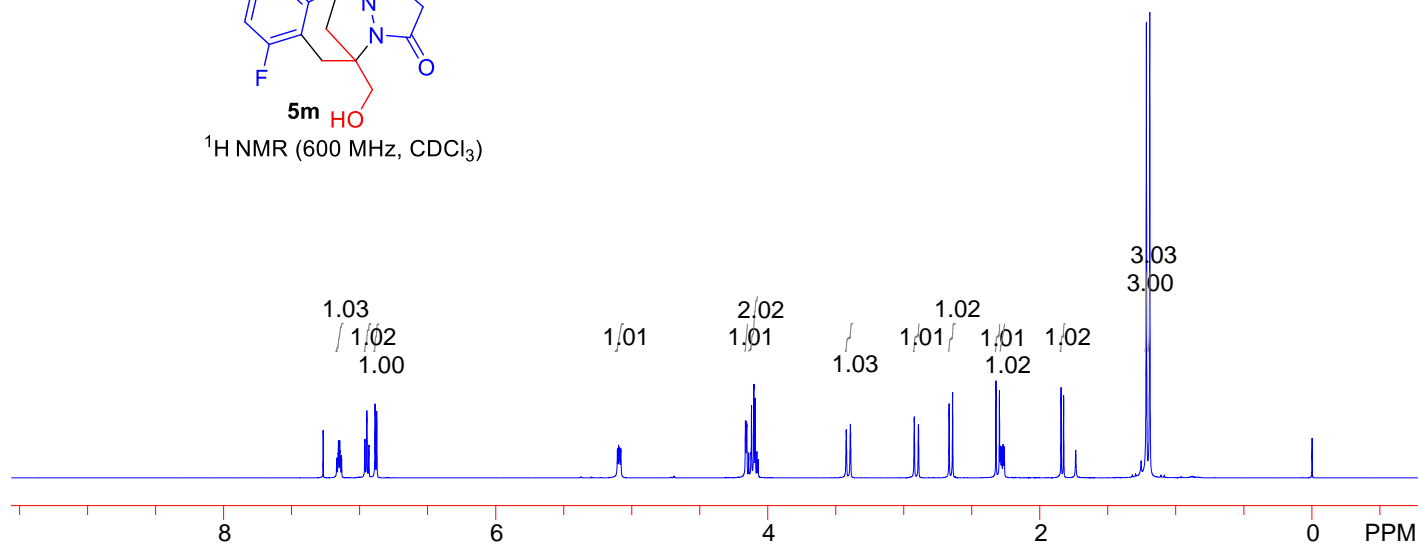

166.875  
162.347  
160.706  
143.162  
143.133  
127.900  
127.849  
121.213  
121.192  
120.842  
120.732  
114.870  
114.731  
77.273  
77.062  
76.850  
65.475  
65.278  
64.804  
55.390  
55.376  
49.258  
38.204  
32.939  
25.056  
21.046

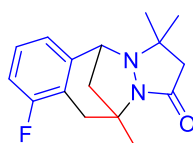

$^{13}\text{C}\{^1\text{H}\}$  (150 MHz,  $\text{CDCl}_3$ )

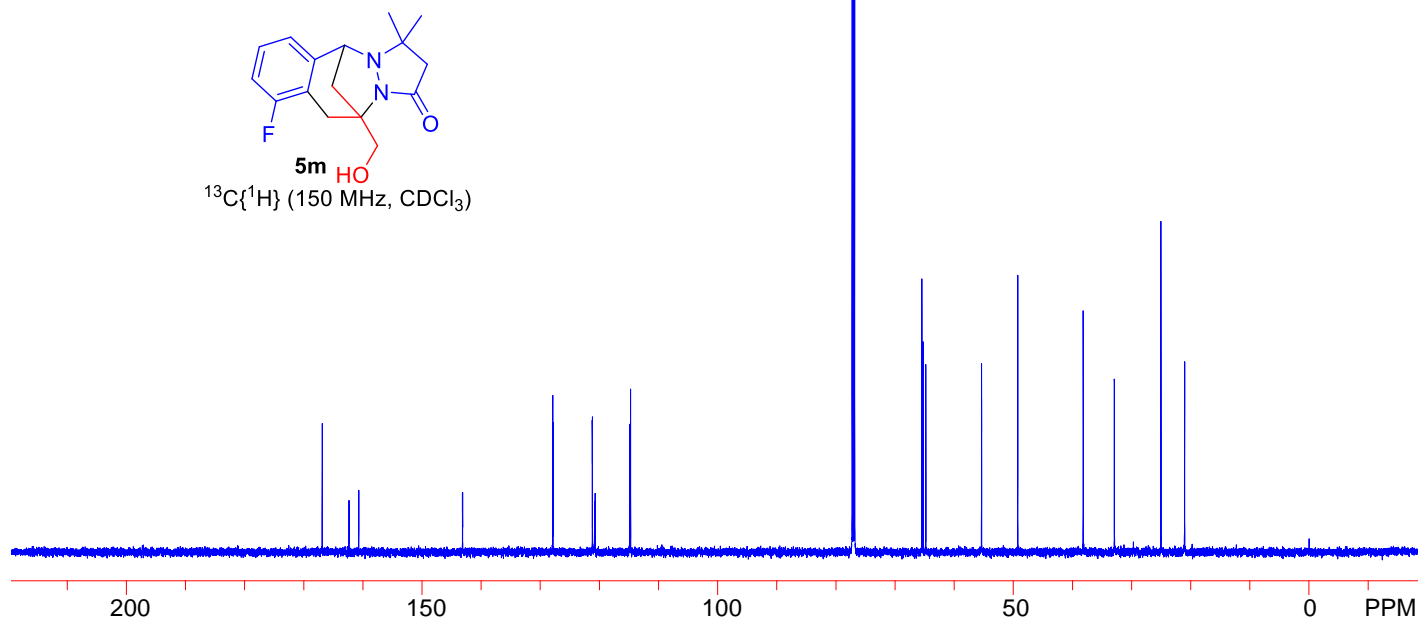

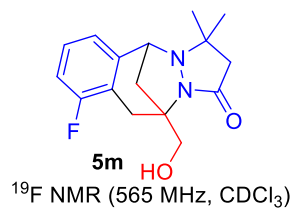

115.651  
115.665  
115.676

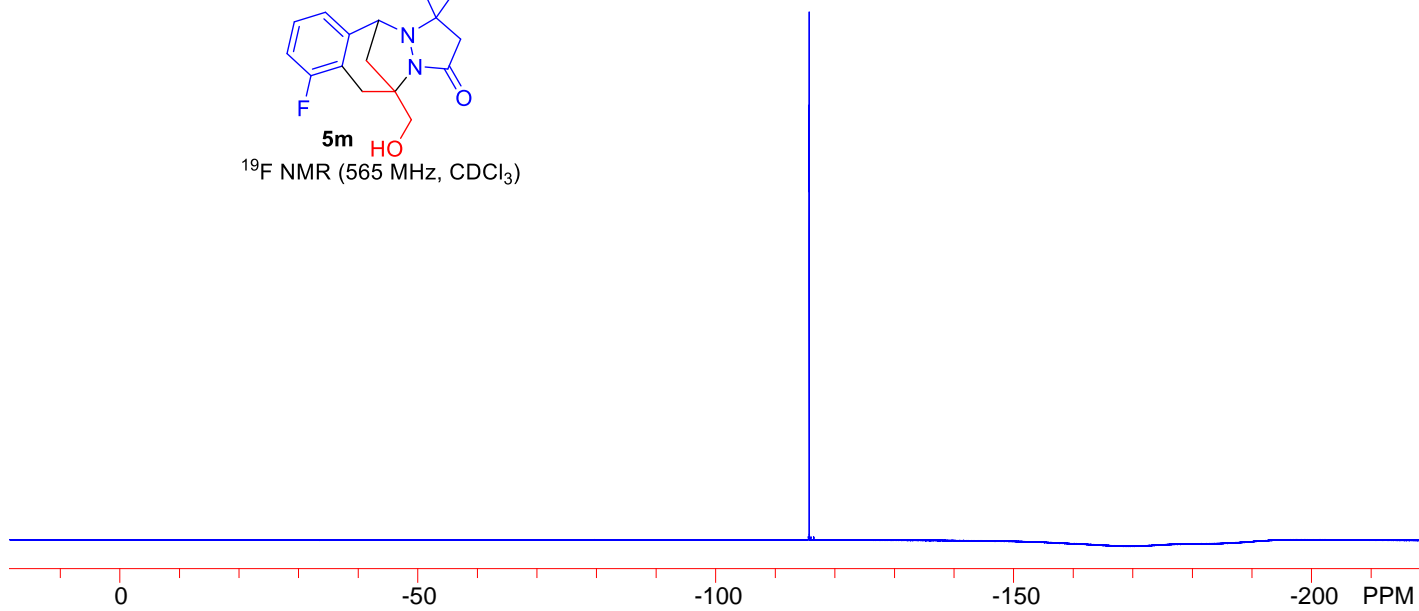

7.270  
7.162  
7.149  
7.135  
6.776  
6.762  
6.704  
6.692

5.131  
5.123  
5.115  
5.107

4.134  
4.117  
4.114  
4.108  
4.100  
4.077  
4.069  
4.056  
4.048

3.791  
3.326  
3.295  
2.821  
2.790  
2.646  
2.621  
2.303  
2.277  
2.259  
2.251  
2.241  
2.233  
1.833  
1.814  
1.209  
1.180

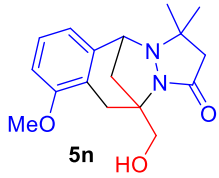

$^1\text{H NMR}$  (600 MHz,  $\text{CDCl}_3$ )

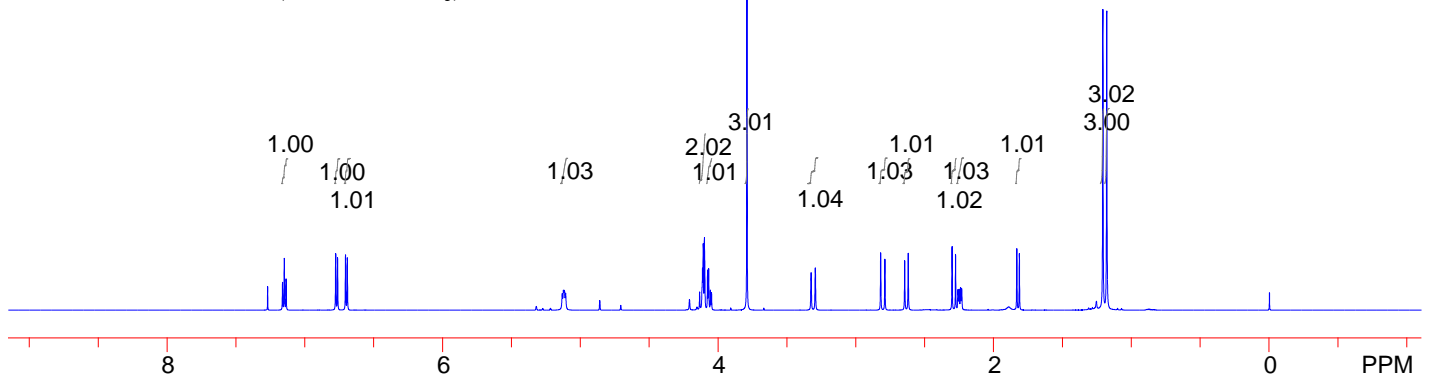

166.758  
157.986  
141.908  
127.339  
121.768  
117.939  
109.619

77.310  
77.098  
76.887  
65.708  
65.650  
64.746  
55.733  
55.193  
49.338  
38.218  
34.106  
24.969  
21.104

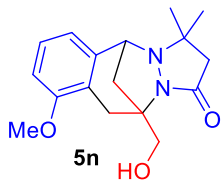

$^{13}\text{C}\{^1\text{H}\}$  (150 MHz,  $\text{CDCl}_3$ )

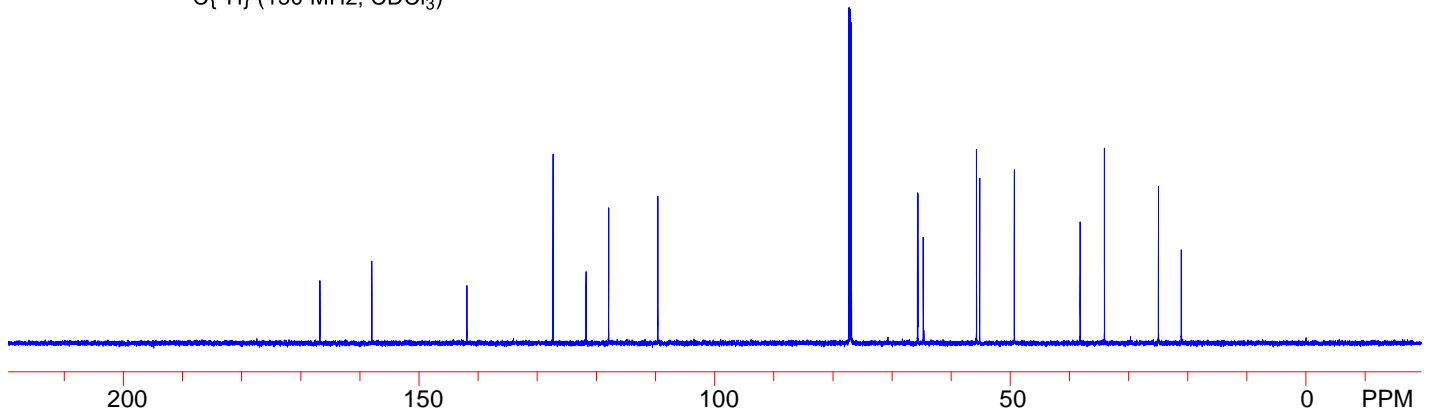



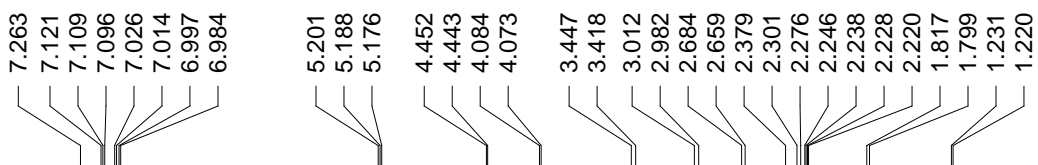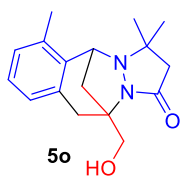

$^1\text{H NMR}$  (600 MHz,  $\text{CDCl}_3$ )

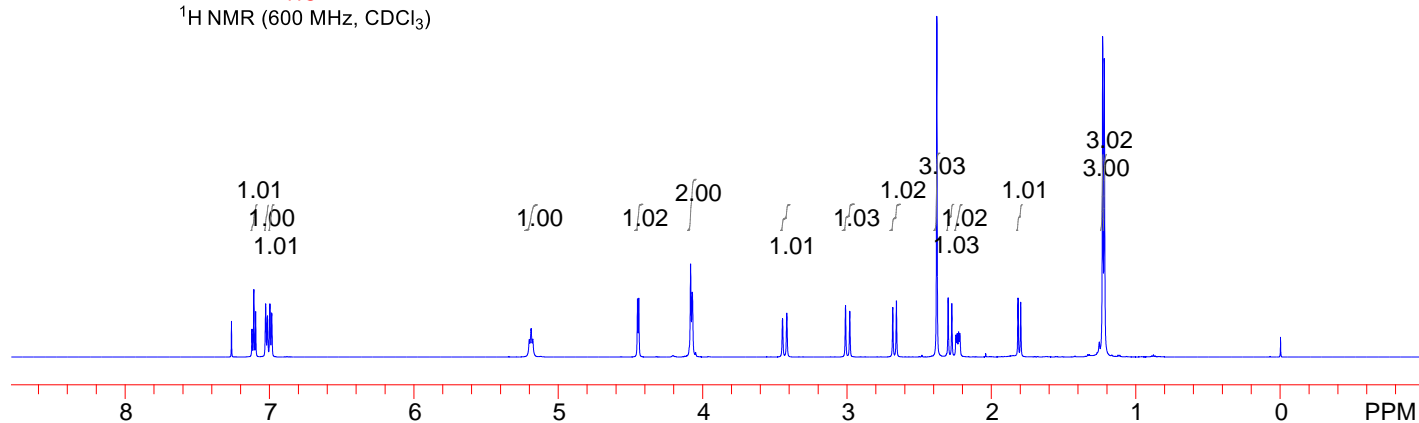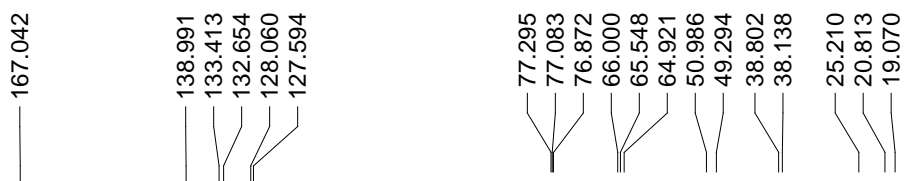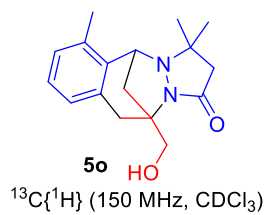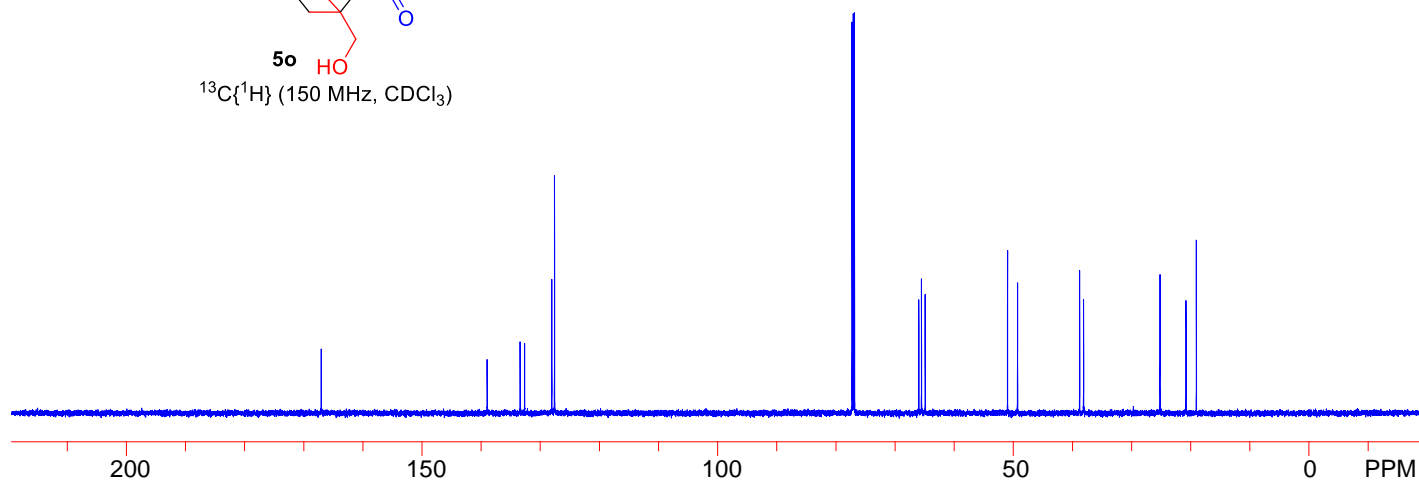

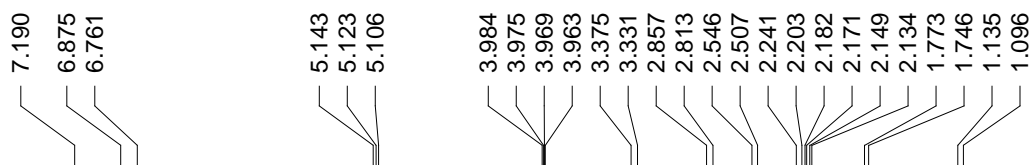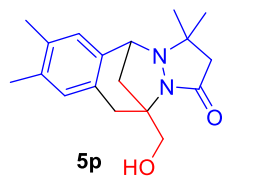

<sup>1</sup>H NMR (400 MHz, CDCl<sub>3</sub>)

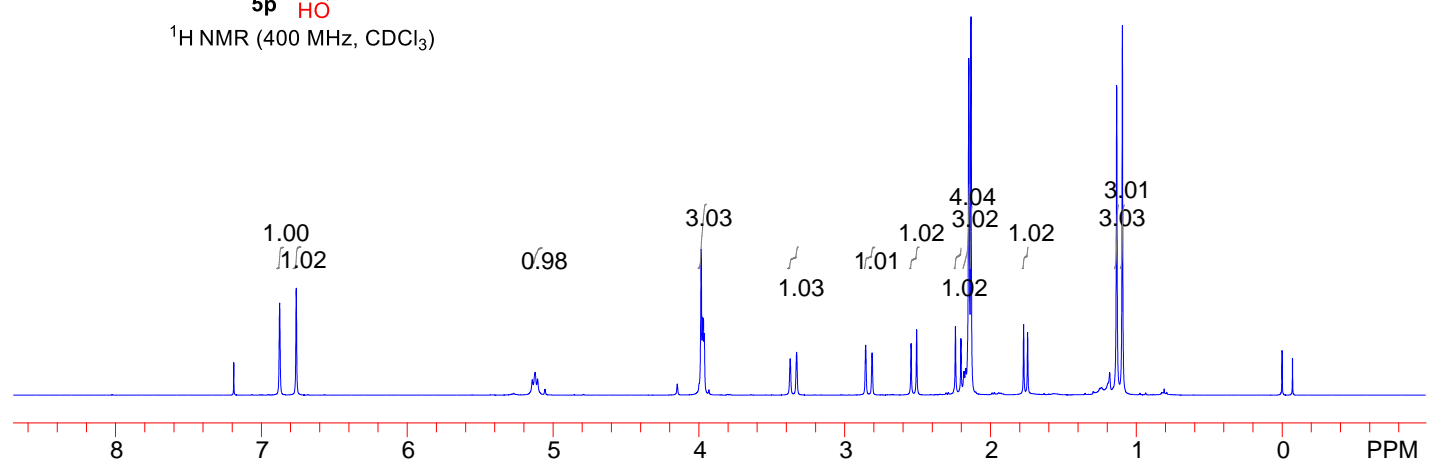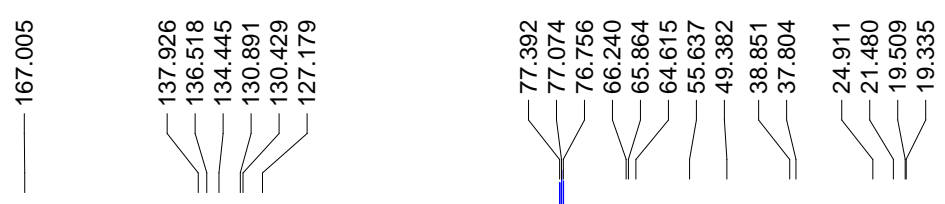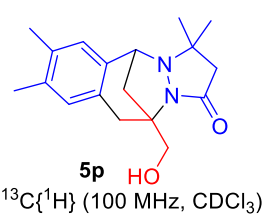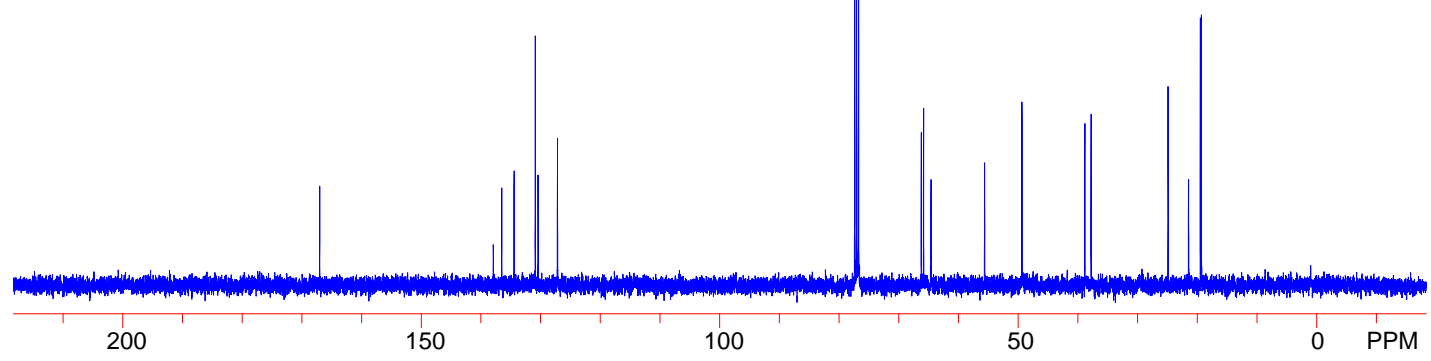

7.268  
6.884  
6.871  
6.833  
6.816

5.174  
5.165  
5.158  
5.149

4.081  
4.073  
4.064  
4.061  
4.055  
4.052  
4.039  
4.035  
4.018

3.450  
3.420  
2.943  
2.913  
2.630  
2.605  
2.323  
2.298  
2.257  
2.255  
2.248  
2.246  
2.230  
1.826  
1.808  
1.208  
1.171

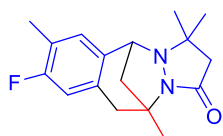

$^1\text{H NMR}$  (600 MHz,  $\text{CDCl}_3$ )

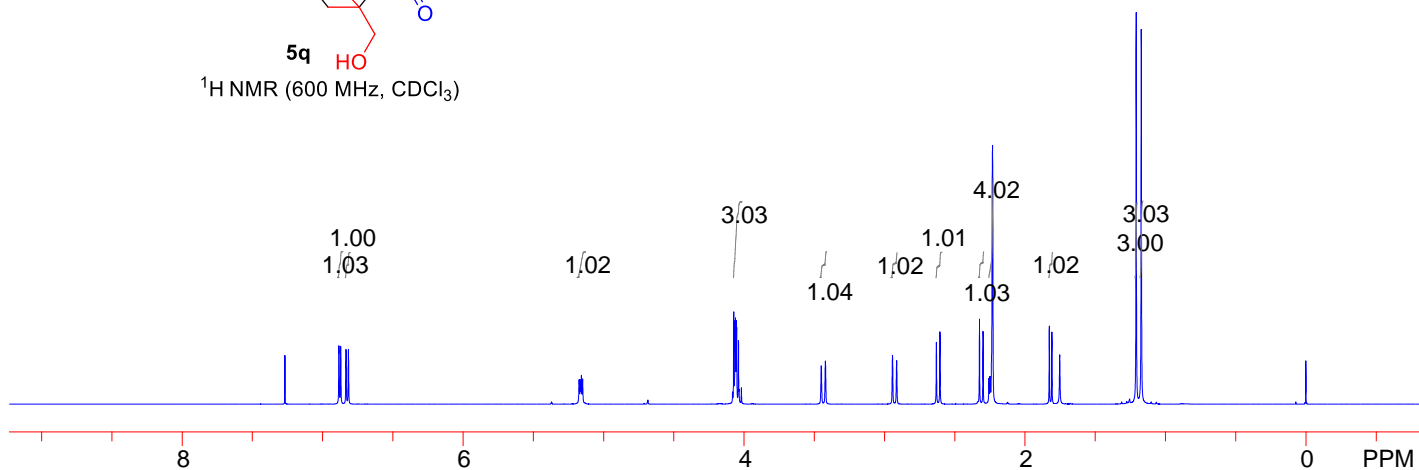

166.970  
161.676  
160.050

136.103  
136.081  
132.705  
132.654  
128.826  
128.790  
122.679  
122.562  
116.109  
115.956

77.273  
77.054  
76.843  
65.759  
65.650  
64.644  
55.274  
49.331  
38.736  
38.123

24.984  
21.381  
14.214  
14.192

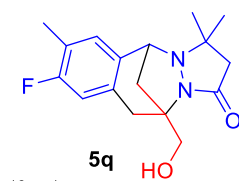

$^{13}\text{C}\{^1\text{H}\}$  (150 MHz,  $\text{CDCl}_3$ )

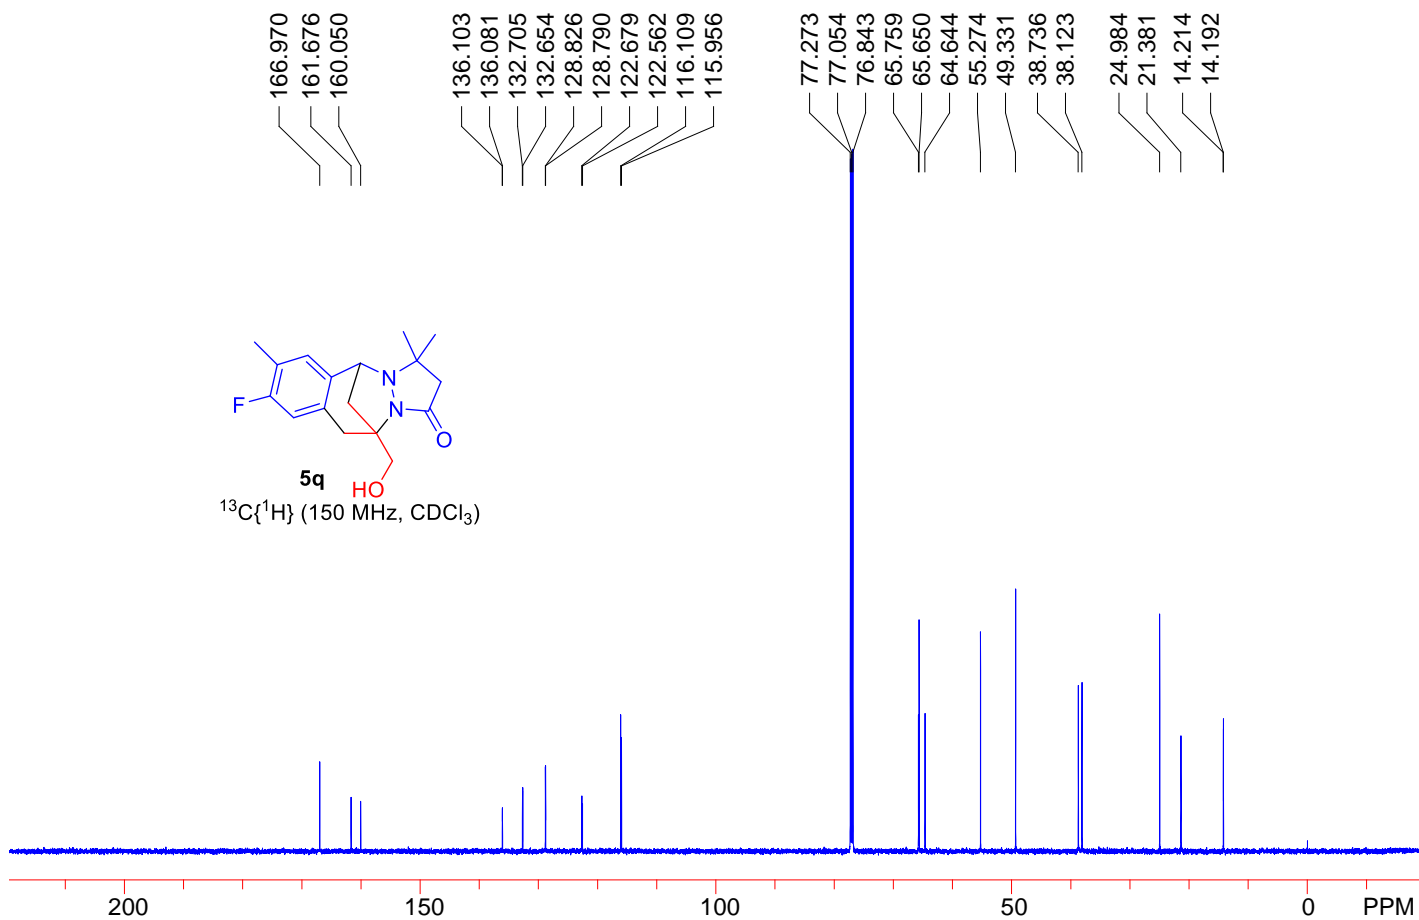

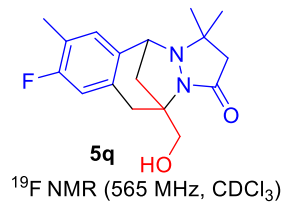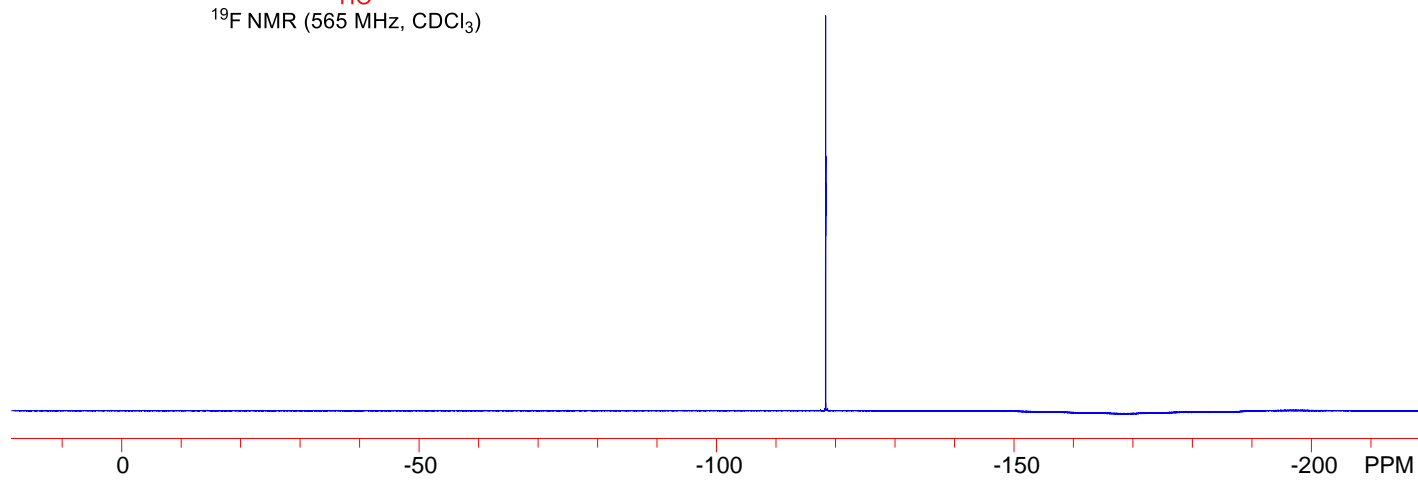

8.034  
8.020  
7.848  
7.835  
7.745  
7.731  
7.576  
7.564  
7.552  
7.483  
7.470  
7.458  
7.295  
7.281  
7.259  
5.300  
5.076  
5.067  
4.167  
4.147  
4.126  
3.636  
3.607  
3.196  
3.166  
2.605  
2.580  
2.425  
2.417  
2.407  
2.398  
2.390  
2.364  
1.967  
1.949  
1.321  
1.076

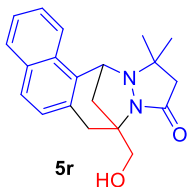

$^1\text{H NMR}$  (600 MHz,  $\text{CDCl}_3$ )

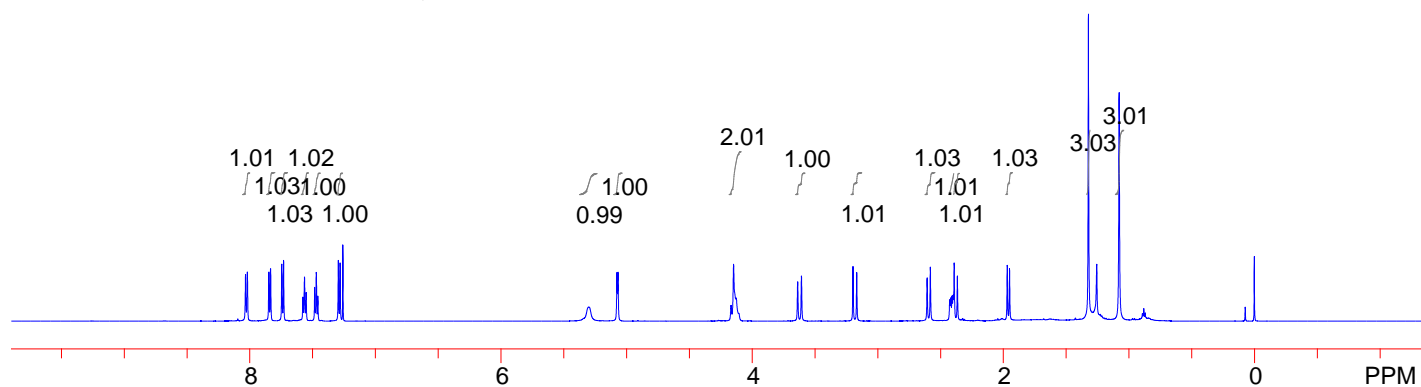

166.765

135.236  
132.385  
131.371  
129.628  
129.030  
128.141  
127.528  
126.690  
125.319  
121.388

77.258  
77.047  
76.836  
65.752  
64.811

49.644  
49.550  
39.553  
38.736

24.706  
21.513

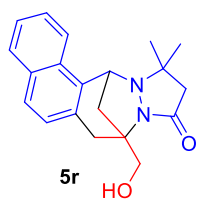

$^{13}\text{C}\{^1\text{H}\}$  (150 MHz,  $\text{CDCl}_3$ )

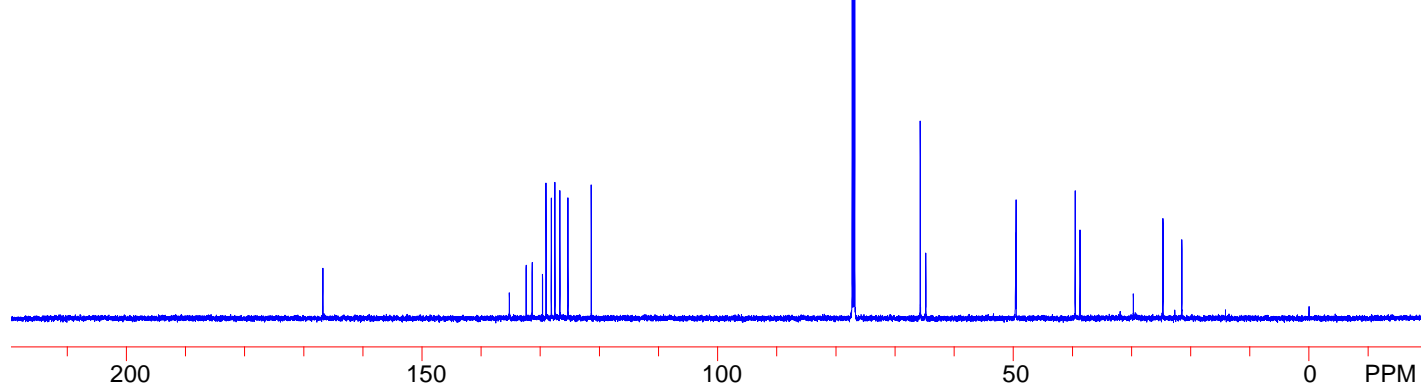

7.267  
7.247  
7.245  
7.233  
7.222  
7.220  
7.176  
7.163  
7.150  
7.093  
7.081

4.085  
4.011  
4.002  
4.847  
3.436  
3.407  
3.302  
3.291  
3.280  
3.270  
3.259  
2.995  
2.965  
2.571  
2.550  
2.545  
2.524  
2.473  
2.462  
2.447  
2.436  
2.188  
2.180  
2.170  
2.161  
1.894  
1.875  
1.331  
1.321

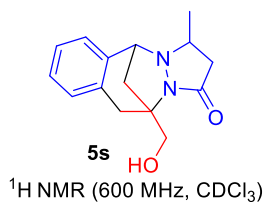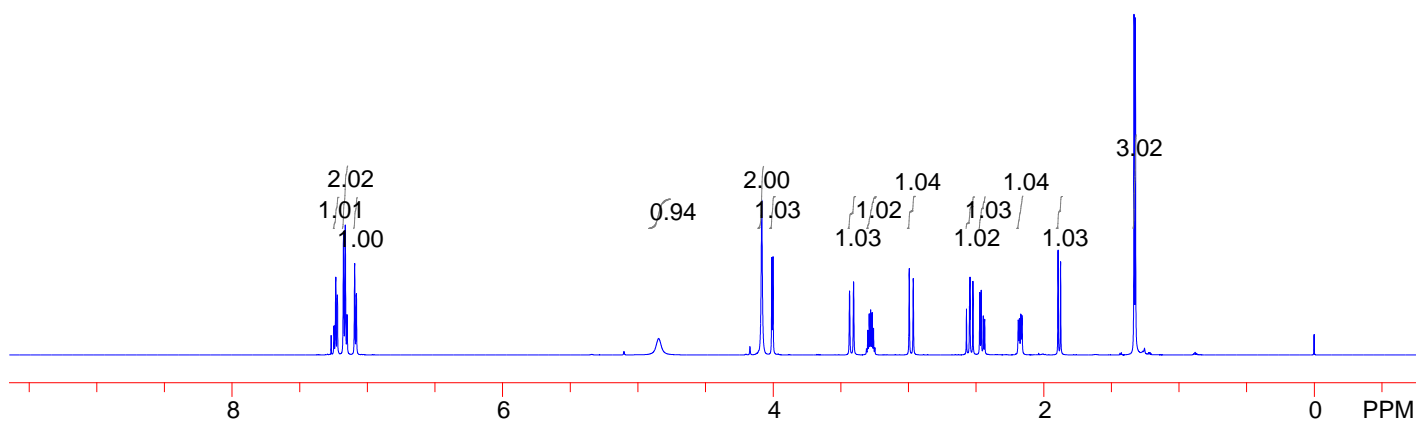

170.885  
140.128  
133.026  
129.665  
128.279  
126.420  
125.661  
77.346  
77.127  
76.916  
68.785  
65.723  
62.522  
59.897  
42.083  
38.306  
35.856  
17.787

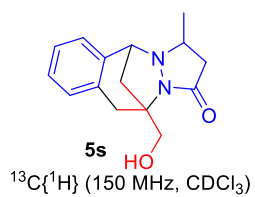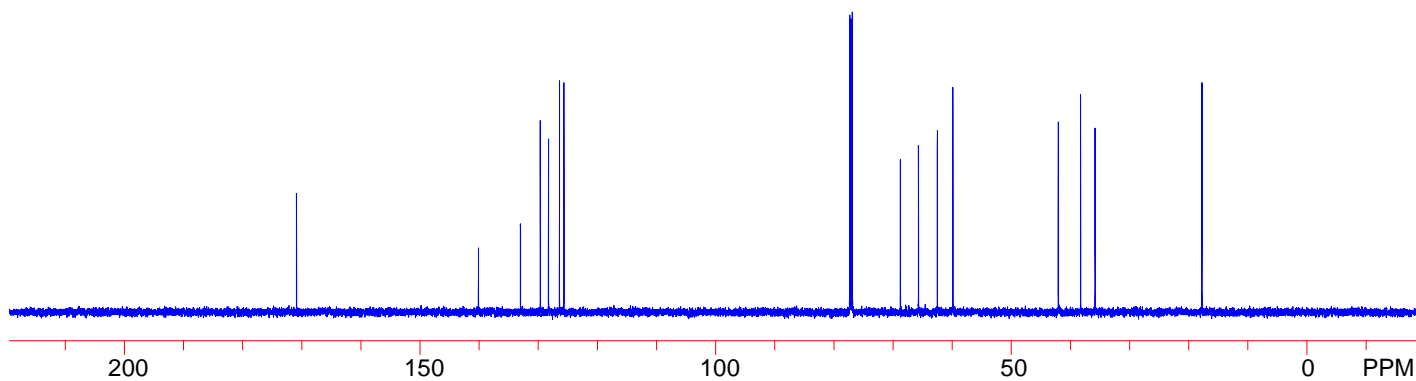

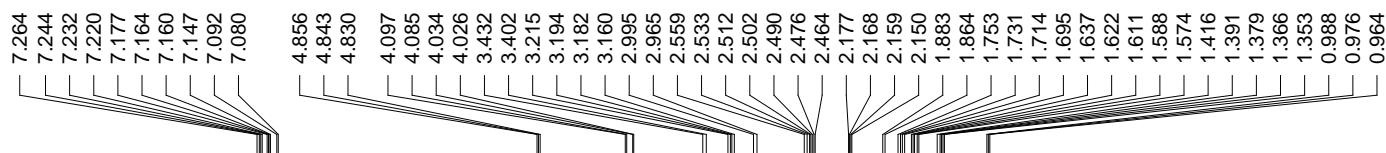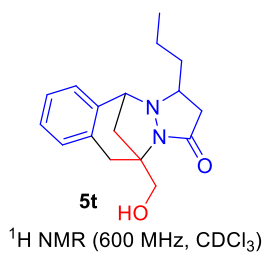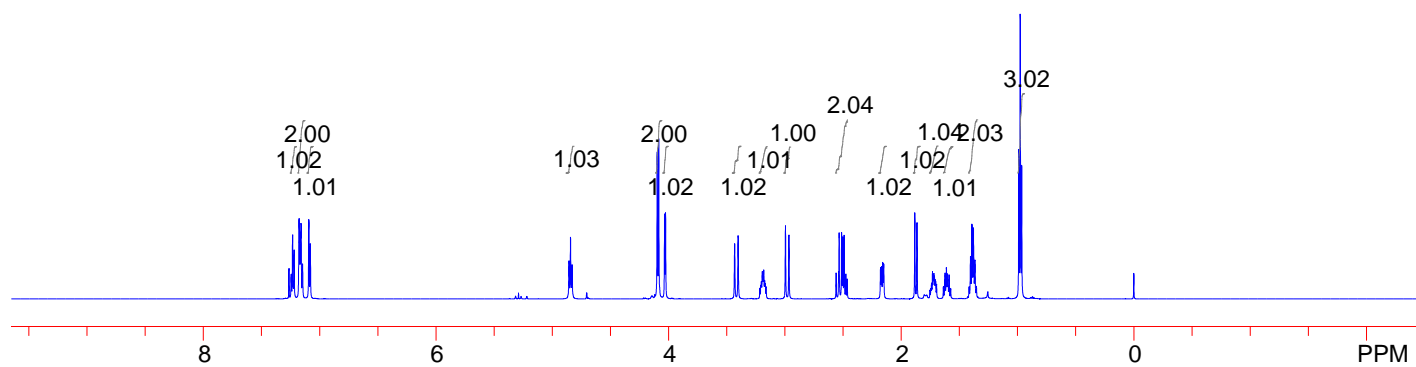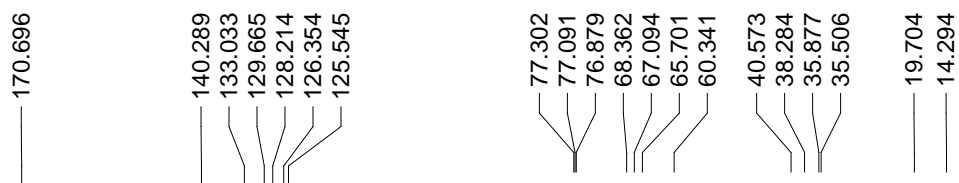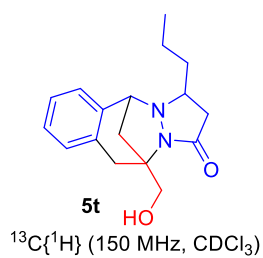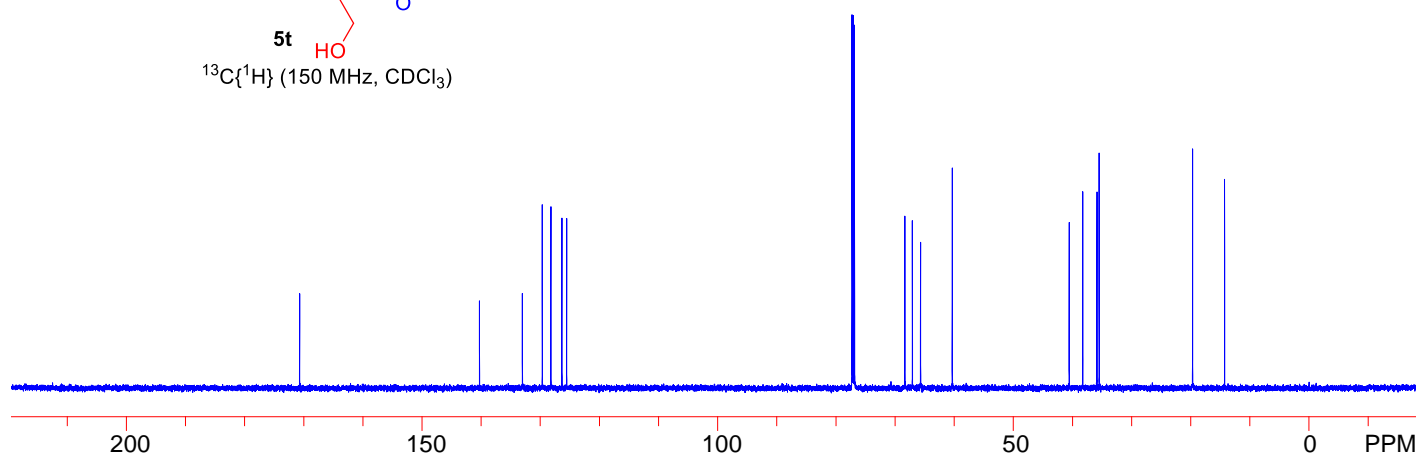

7.265  
7.248  
7.245  
7.233  
7.222  
7.221  
7.181  
7.164  
7.151  
7.097  
7.084  
4.844  
4.835  
4.827  
4.818  
4.135  
4.117  
4.113  
4.097  
4.052  
4.043  
4.031  
4.022  
4.005  
3.997  
3.438  
3.409  
3.000  
2.970  
2.788  
2.778  
2.757  
2.747  
2.517  
2.505  
2.496  
2.485  
2.157  
2.149  
2.138  
2.130  
1.873  
1.854  
1.330  
1.319  
1.128  
1.116

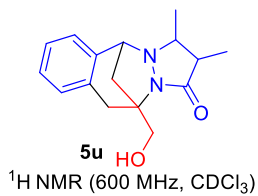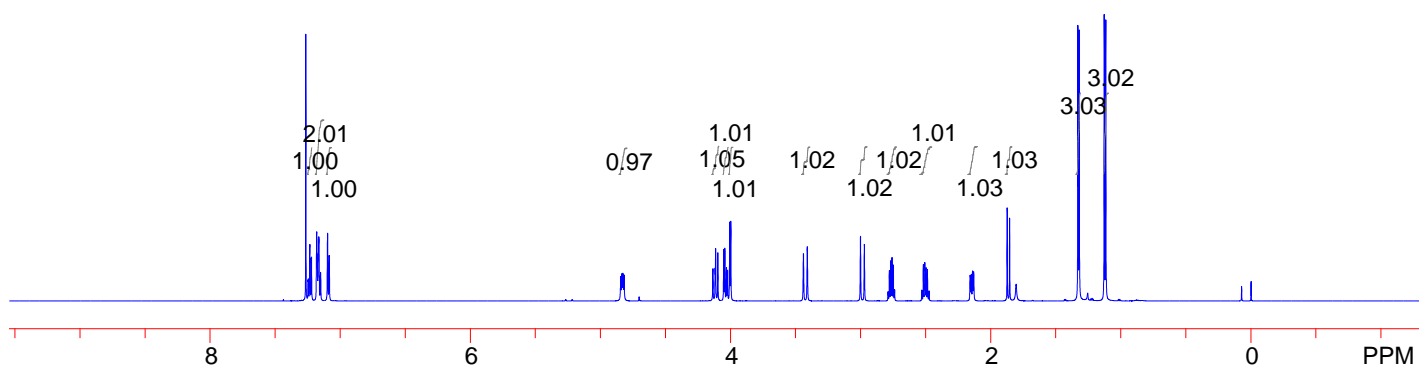

173.313

140.274  
133.070  
129.679  
128.257  
126.405  
125.618

77.302  
77.091  
76.879  
69.434  
68.494  
65.708  
59.714  
46.086  
38.342  
35.557

16.737  
11.341

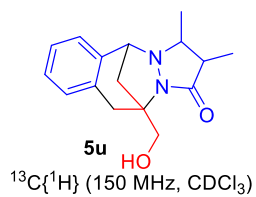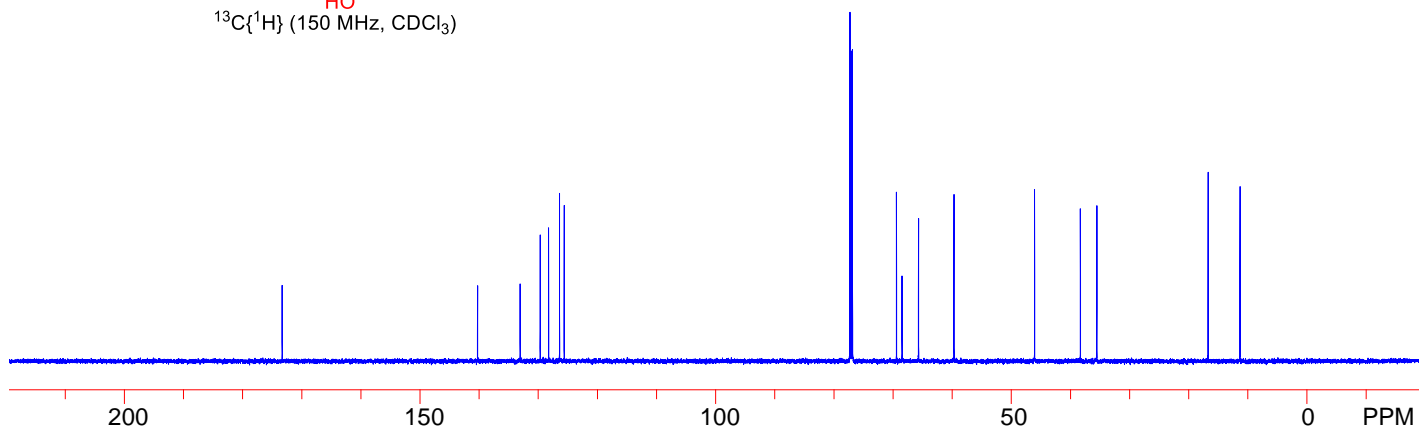



## VI. Copies of NMR spectra of 6-9

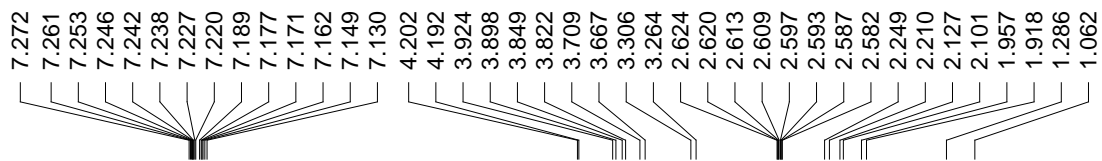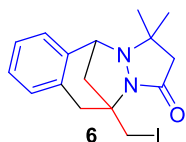

$^1\text{H NMR}$  (400 MHz,  $\text{CDCl}_3$ )

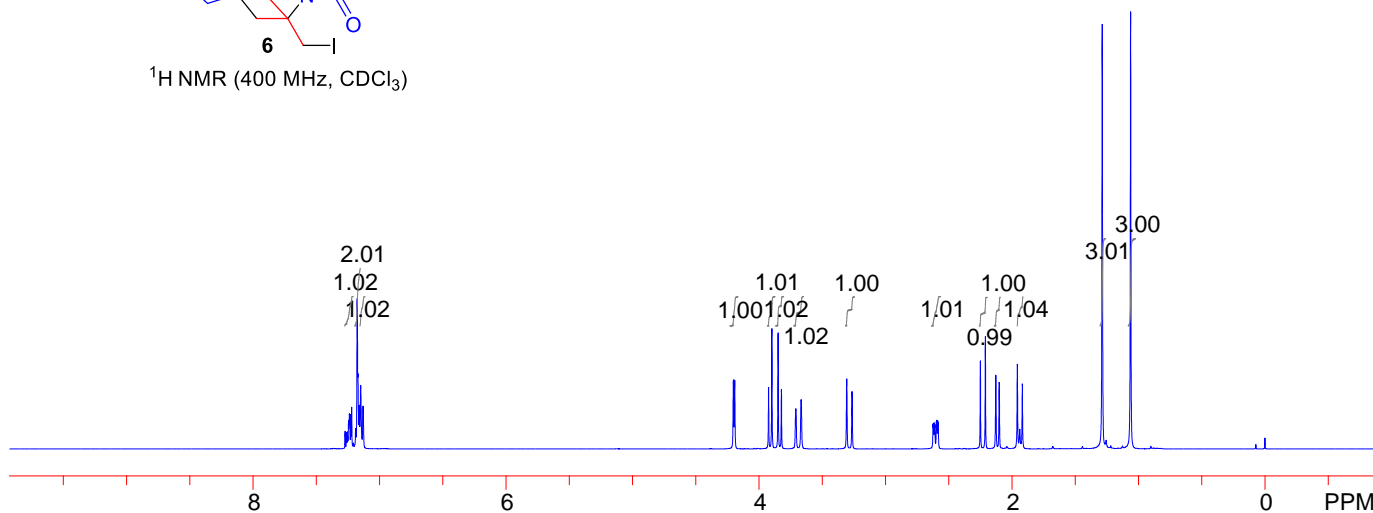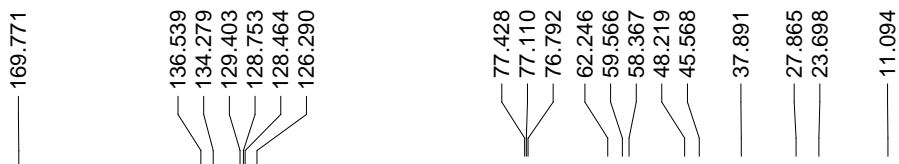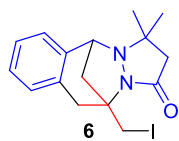

$^{13}\text{C}\{^1\text{H}\}$  (100 MHz,  $\text{CDCl}_3$ )

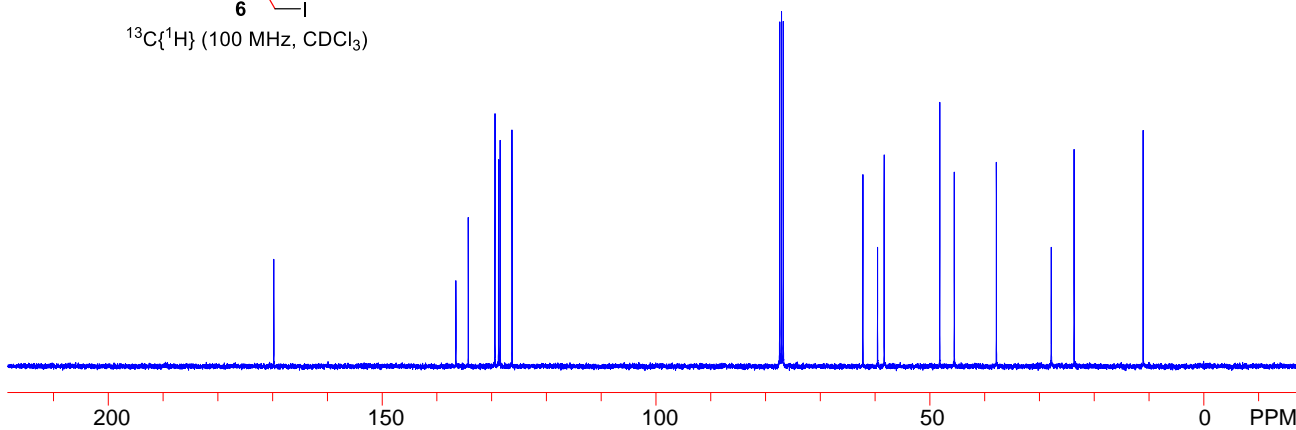

7.839  
7.825  
7.374  
7.361  
7.268  
7.228  
7.225  
7.214  
7.205  
7.202  
7.167  
7.154  
7.143  
7.134  
7.100  
7.087  
4.624  
4.607  
4.525  
4.508  
4.171  
4.164  
3.429  
3.401  
3.039  
3.011  
2.524  
2.518  
2.505  
2.500  
2.457  
2.142  
2.115  
2.076  
2.059  
2.035  
1.204  
1.122

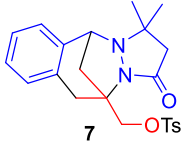

<sup>1</sup>H NMR (600 MHz, CDCl<sub>3</sub>)

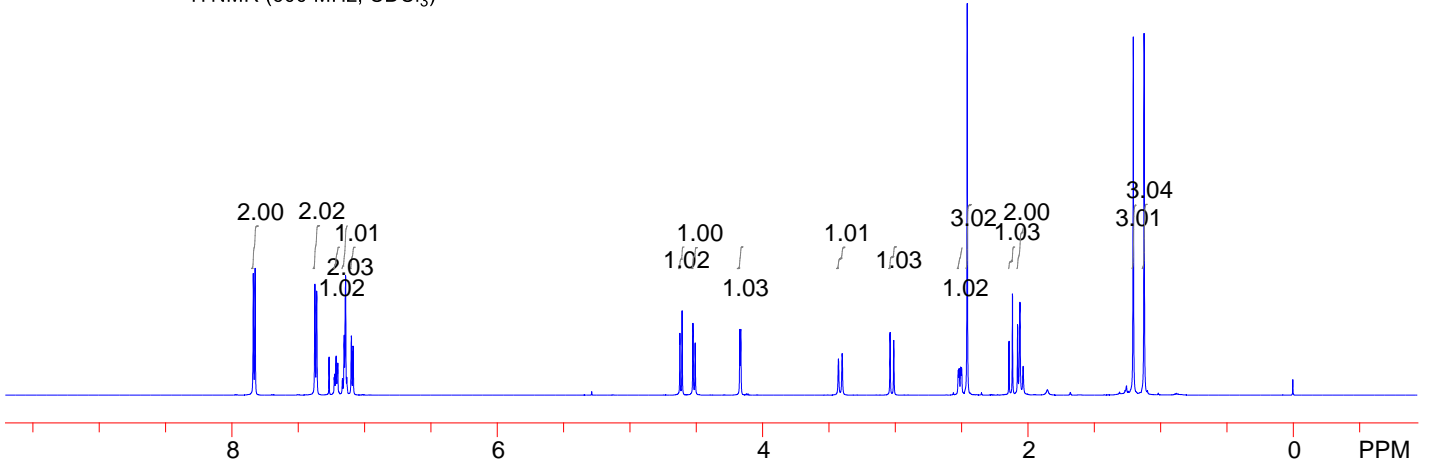

170.134  
145.138  
137.387  
133.245  
132.625  
130.000  
129.643  
128.403  
128.112  
128.075  
126.376  
77.324  
77.113  
76.901  
71.090  
61.997  
60.633  
57.447  
48.135  
40.880  
36.366  
26.187  
24.181  
21.702

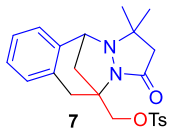

<sup>13</sup>C{<sup>1</sup>H} (150 MHz, CDCl<sub>3</sub>)

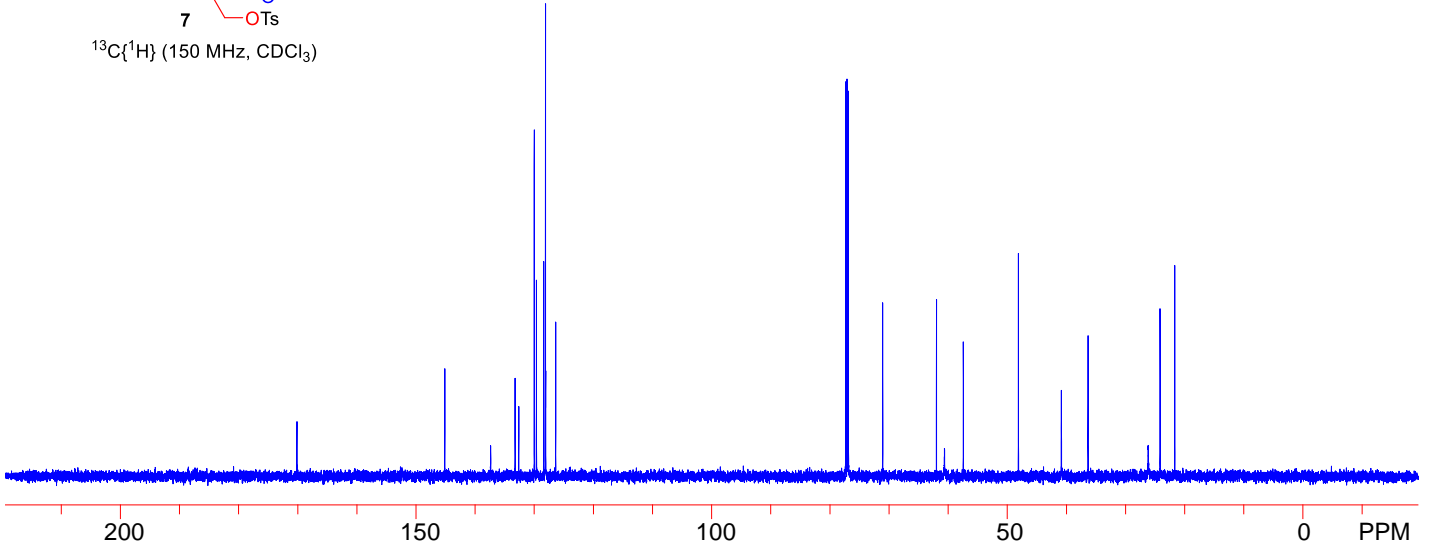

7.586  
7.574  
7.547  
7.534  
7.342  
7.331  
7.318  
7.303  
7.300  
7.256  
7.195  
7.183  
7.171  
7.151  
7.139  
7.127  
7.101  
7.088  
7.062  
7.050  
4.825  
4.806  
4.716  
4.697  
4.033  
4.026  
3.512  
3.484  
3.247  
3.232  
3.219  
3.207  
3.195  
3.179  
3.002  
2.999  
2.991  
2.987  
2.979  
2.974  
2.949  
2.921  
2.484  
2.477  
2.466  
2.459  
2.169  
2.143  
2.111  
1.897  
1.879  
1.211  
1.131

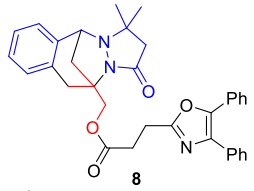

$^1\text{H NMR}$  (600 MHz,  $\text{CDCl}_3$ )

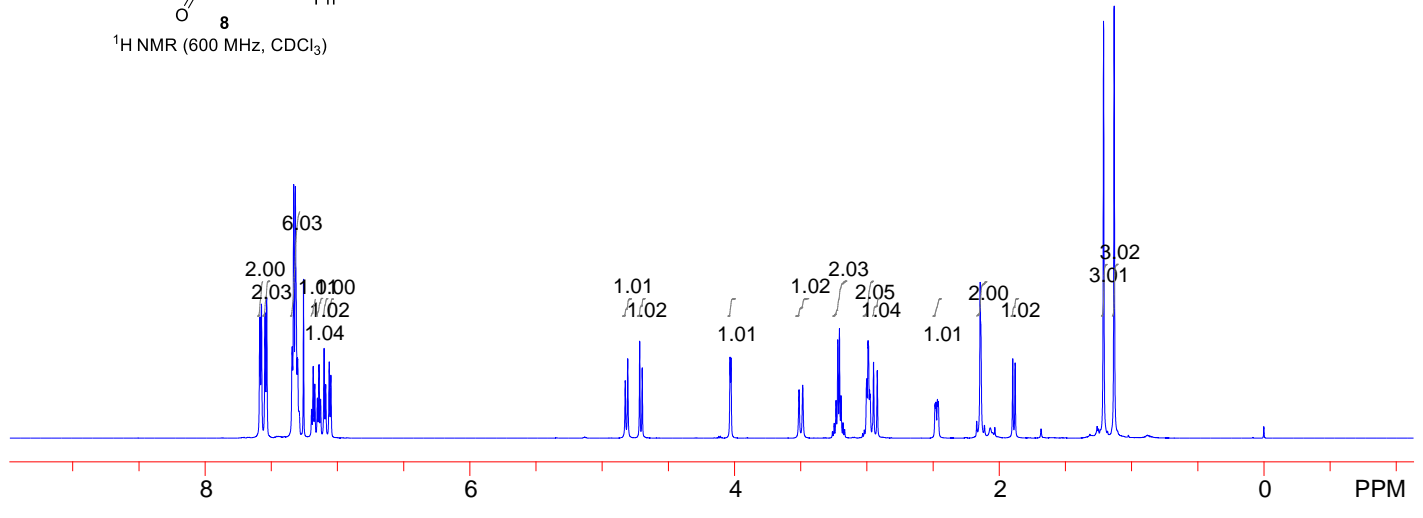

171.483  
169.733  
161.741  
137.999  
135.148  
145.466  
133.435  
132.487  
129.679  
128.950  
128.680  
128.564  
128.491  
128.279  
128.068  
127.937  
127.754  
126.493  
126.267  
77.353  
77.142  
76.930  
65.278  
62.485  
60.845  
57.133  
48.390  
40.267  
36.986  
31.043  
25.625  
24.305  
23.481

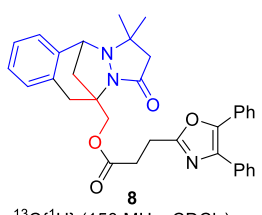

$^{13}\text{C}\{^1\text{H}\}$  (150 MHz,  $\text{CDCl}_3$ )

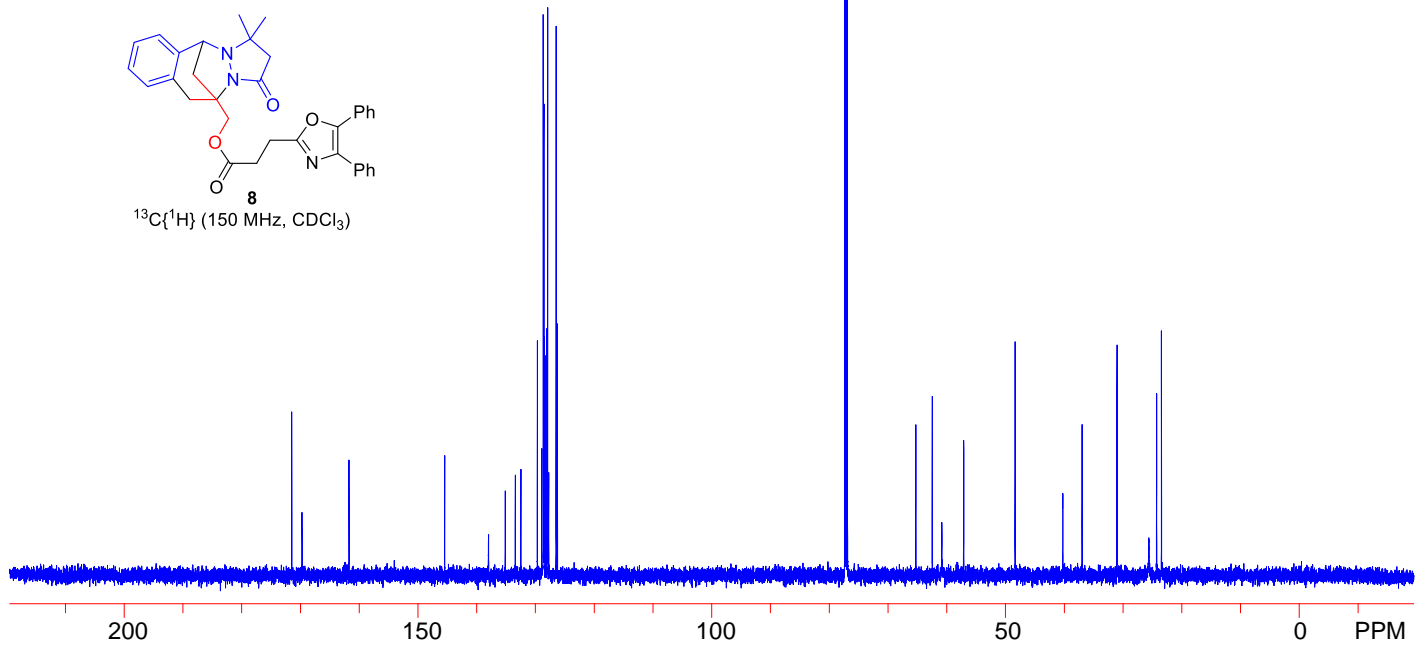

8.656  
8.111  
8.097  
8.005  
7.985  
7.971  
7.917  
7.902  
7.796  
7.782  
7.600  
7.597  
7.541  
7.538  
7.527  
7.524  
7.266  
7.258  
7.251  
7.243  
7.196  
7.186  
7.180  
6.988  
6.974  
5.015  
4.997  
4.982  
4.963  
4.212  
4.205  
3.886  
3.758  
3.730  
3.134  
3.106  
2.659  
2.653  
2.641  
2.635  
2.228  
2.202  
2.181  
2.147  
2.122  
2.103  
1.799  
1.291  
1.204

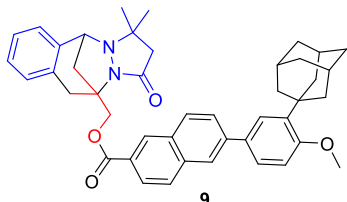

$^1\text{H NMR}$  (600 MHz,  $\text{CDCl}_3$ )

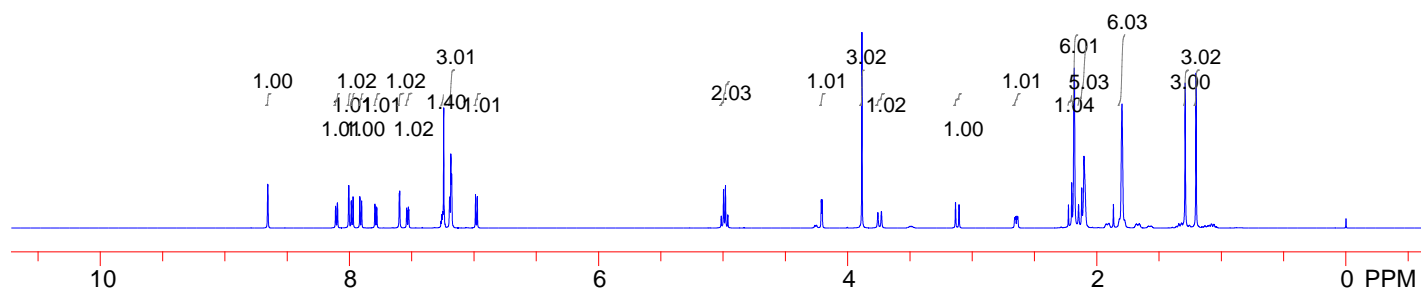

141.528  
139.049  
170.440  
166.393  
158.992  
137.664  
136.111  
133.734  
133.004  
132.538  
131.269  
131.211  
129.811  
128.410  
128.352  
128.126  
126.668  
126.536  
126.369  
125.997  
125.778  
125.683  
124.757  
112.157  
77.302  
77.091  
76.879  
65.861  
62.813  
60.225  
57.571  
55.201  
48.230  
40.916  
40.639  
37.234  
37.154  
36.913  
29.133  
26.493  
24.254

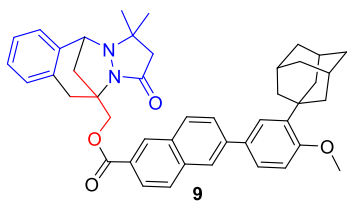

$^{13}\text{C}\{^1\text{H}\}$  (150 MHz,  $\text{CDCl}_3$ )

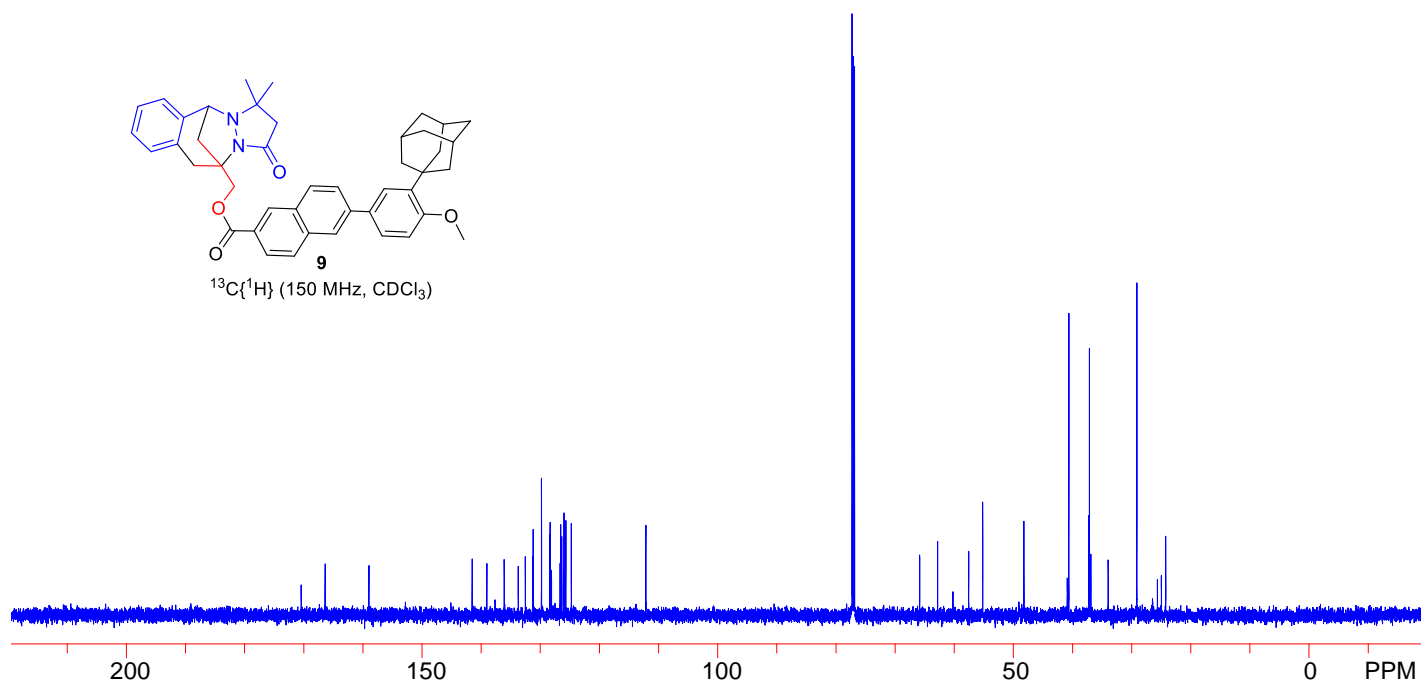

## VII. X-ray crystal structure and data of **3p**

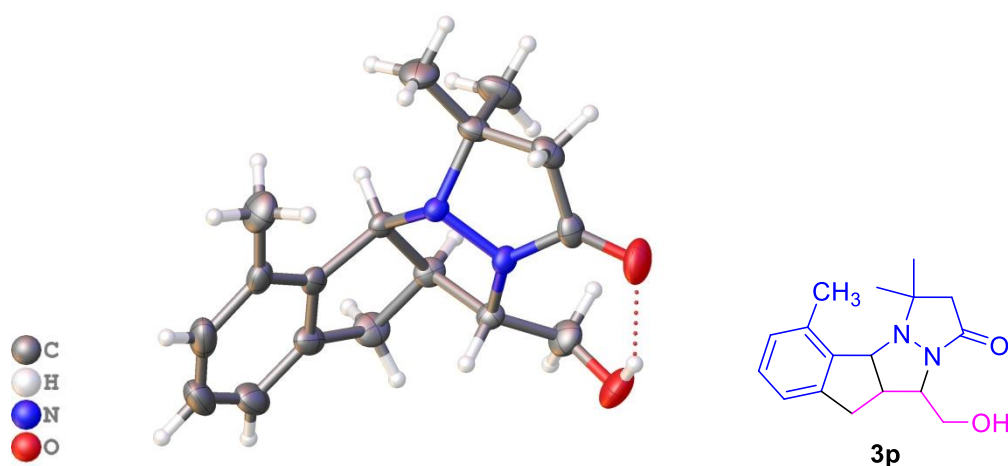

**Figure S1.** X-ray crystal structure of **3p** with 50% ellipsoid probability

**X-ray structure determination.** Single crystals suitable for X-ray diffraction were obtained by slow evaporation of the solvent from a dichloromethane/chloroform (1:1) solution of **3p**. Crystal data collection and refinement parameters of **3p** are summarized in Table S1. Intensity data were collected at 293 K on a SuperNova Dual diffractometer using mirror-monochromated Cu K $\alpha$  radiation,  $\lambda = 1.54184 \text{ \AA}$ . The data were corrected for decay, Lorentz, and polarization effects as well as absorption and beam corrections based on the multi-scan technique. Using Olex2, the structure was solved with the SHELXS structure solution program using Direct Methods and refined with the SHELXL refinement package using Least Squares minimisation. Nonhydrogen atoms were refined with anisotropic displacement parameters. The H-atoms were either located or calculated and subsequently treated with a riding model.

**Table S1.** Crystallographic data and structure refinement results of **3p**

|                   |                                                               |
|-------------------|---------------------------------------------------------------|
| Empirical formula | C <sub>17</sub> H <sub>22</sub> N <sub>2</sub> O <sub>2</sub> |
| Formula weight    | 286.36                                                        |
| Temp, K           | 293 (2)                                                       |
| Crystal system    | monoclinic                                                    |
| Space group       | P2 <sub>1</sub> /c                                            |
| <i>a</i> , Å      | 10.6552(2)                                                    |
| <i>b</i> , Å      | 14.5864(2)                                                    |
| <i>c</i> , Å      | 9.8599(2)                                                     |

|                                           |                |
|-------------------------------------------|----------------|
| $\alpha$ (°)                              | 90             |
| $\beta$ (°)                               | 104.578(2)     |
| $\gamma$ (°)                              | 90             |
| Volume, Å <sup>3</sup>                    | 1483.10(5)     |
| Z                                         | 4              |
| $\rho_{\text{calc}}$ , g cm <sup>-3</sup> | 1.283          |
| $\lambda$ , Å                             | 1.54184        |
| $\mu$ , mm <sup>-1</sup>                  | 0.673          |
| No. of data collected                     | 10291          |
| No. of unique data                        | 2860           |
| $R_{\text{int}}$                          | 0.0372         |
| Goodness-of-fit on $F^2$                  | 1.090          |
| $R_1$ , $wR_2$ ( $I > 2\sigma(I)$ )       | 0.0613, 0.1535 |
| $R_1$ , $wR_2$ (all data)                 | 0.0659, 0.1596 |

## VIII. X-ray crystal structure and data of 5a

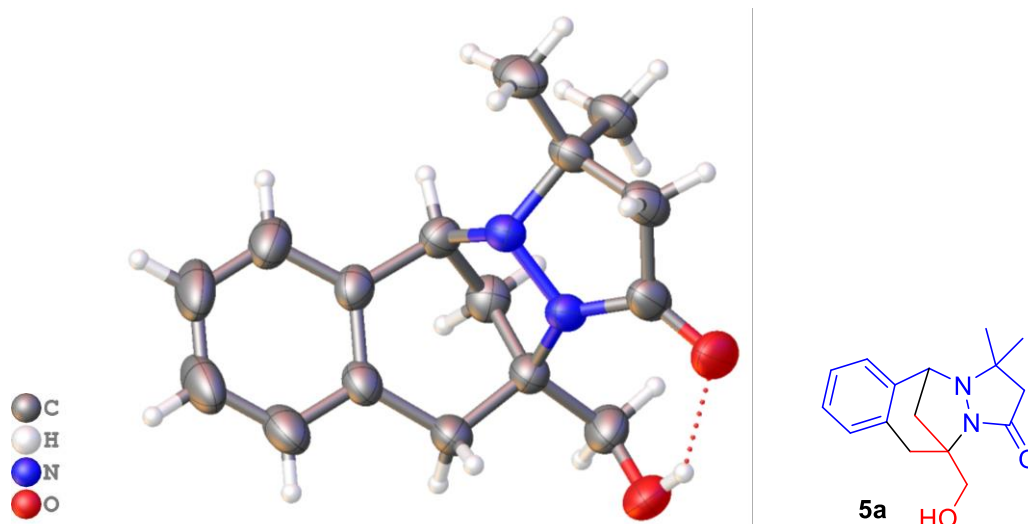

**Figure S2.** X-ray crystal structure of **5a** with 50% ellipsoid probability

**X-ray structure determination.** Single crystals suitable for X-ray diffraction were obtained by slow evaporation of the solvent from a petroleum ether/dichloromethane (1:1) solution of **5a**. Crystal data collection and refinement parameters of **5a** are summarized in Table S2. Intensity data were collected at 293 K on a SuperNova Dual diffractometer using mirror-monochromated Cu K $\alpha$  radiation,  $\lambda = 1.54184 \text{ \AA}$ . The data were corrected for decay, Lorentz, and polarization effects as well as absorption and beam corrections based on the multi-scan technique. Using Olex2, the structure was solved with the SHELXS structure solution program using Direct Methods and refined with the SHELXL refinement package using Least Squares minimisation. Nonhydrogen atoms were refined with anisotropic displacement parameters. The H-atoms were either located or calculated and subsequently treated with a riding model.

**Table S2.** Crystallographic data and structure refinement results of **5a**

|                   |                                                               |
|-------------------|---------------------------------------------------------------|
| Empirical formula | C <sub>16</sub> H <sub>20</sub> N <sub>2</sub> O <sub>2</sub> |
| Formula weight    | 272.34                                                        |
| Temp, K           | 293 (2)                                                       |
| Crystal system    | triclinic                                                     |
| Space group       | P-1                                                           |
| <i>a</i> , Å      | 7.2189(4)                                                     |
| <i>b</i> , Å      | 10.6828(5)                                                    |

|                                           |                |
|-------------------------------------------|----------------|
| $c$ , Å                                   | 10.8857(7)     |
| $\alpha$ (°)                              | 111.682(5)     |
| $\beta$ (°)                               | 107.730(5)     |
| $\gamma$ (°)                              | 94.966(4)      |
| Volume, Å <sup>3</sup>                    | 724.00(8)      |
| $Z$                                       | 2              |
| $\rho_{\text{calc}}$ , g cm <sup>-3</sup> | 1.249          |
| $\lambda$ , Å                             | 1.54184        |
| $\mu$ , mm <sup>-1</sup>                  | 0.665          |
| No. of data collected                     | 4574           |
| No. of unique data                        | 2736           |
| $R_{\text{int}}$                          | 0.0264         |
| Goodness-of-fit on $F^2$                  | 1.079          |
| $R_1$ , $wR_2$ ( $I > 2\sigma(I)$ )       | 0.0750, 0.1975 |
| $R_1$ , $wR_2$ (all data)                 | 0.0801, 0.2050 |



## IX. References

- (1) M. Zhang, F. Wu, H. Wang, J. Wu and W. Chen, Copper-Catalyzed Sequential Azomethine Imine-Alkyne Cycloaddition and Umpolung Thiolation Reactions. *Adv. Synth. Catal.*, 2017, **359**, 2768–2772.
- (2) S. Zhang, Y. Zheng, Z. Zhang, S. Chen, H. Xie, B. Shu, J. Song, Y. Liu, Y. Zeng and L. Zhang, Access to Branched Allylarenes via Rhodium(III)-Catalyzed C–H Allylation of (Hetero)arenes with 2-Methylidenetrimethylene Carbonate, *Org. Lett.*, 2021, **23**, 5719–5723.
- (3) X. Wang, X. Xun, H. Song, Y. Liu and Q. Wang, Palladium Metallaphotoredox-Catalyzed 2-Arylation of Indole Derivatives, *Org. Lett.*, 2022, **24**, 4580–4585.
